# Supplementary material for: Prevalence and impact of chronic dysglycaemia among patients with COVID-19 in Swedish intensive care units: a multicentre, retrospective cohort study
Source: PubMed Central journal article supplement (PMC10510869; doi:10.1136/bmjopen-2022-071330), 2023-09-19
Supplement: bmjopen-2022-071330.draft_revisions.pdf [file bmjopen-2022-071330.draft_revisions.pdf]

# BMJ Open

BMJ Open is committed to open peer review. As part of this commitment we make the peer review history of every article we publish publicly available.

When an article is published we post the peer reviewers' comments and the authors' responses online. We also post the versions of the paper that were used during peer review. These are the versions that the peer review comments apply to.

The versions of the paper that follow are the versions that were submitted during the peer review process. They are not the versions of record or the final published versions. They should not be cited or distributed as the published version of this manuscript.

BMJ Open is an open access journal and the full, final, typeset and author-corrected version of record of the manuscript is available on our site with no access controls, subscription charges or pay-per-view fees (<http://bmjopen.bmj.com>).

If you have any questions on BMJ Open's open peer review process please email [info.bmjopen@bmj.com](mailto:info.bmjopen@bmj.com)

# BMJ Open

## Chronic dysglycemia in critically ill patients with Covid-19 – a retrospective cohort study

|                               |                                                                                                                                                                                                                                                                                                                                                                                                                                                                                                                                                                                                                                                                                                                                                                                                                            |
|-------------------------------|----------------------------------------------------------------------------------------------------------------------------------------------------------------------------------------------------------------------------------------------------------------------------------------------------------------------------------------------------------------------------------------------------------------------------------------------------------------------------------------------------------------------------------------------------------------------------------------------------------------------------------------------------------------------------------------------------------------------------------------------------------------------------------------------------------------------------|
| Journal:                      | <i>BMJ Open</i>                                                                                                                                                                                                                                                                                                                                                                                                                                                                                                                                                                                                                                                                                                                                                                                                            |
| Manuscript ID                 | bmjopen-2022-071330                                                                                                                                                                                                                                                                                                                                                                                                                                                                                                                                                                                                                                                                                                                                                                                                        |
| Article Type:                 | Original research                                                                                                                                                                                                                                                                                                                                                                                                                                                                                                                                                                                                                                                                                                                                                                                                          |
| Date Submitted by the Author: | 23-Dec-2022                                                                                                                                                                                                                                                                                                                                                                                                                                                                                                                                                                                                                                                                                                                                                                                                                |
| Complete List of Authors:     | <p>Balintescu, Anca; Karolinska Institute, Department of Clinical Science and Education, Södersjukhuset<br/> Rysz, Susanne; Karolinska Institute, Department of Perioperative Medicine and Intensive Care<br/> Hertz, Carl; Stockholm South General Hospital Anaesthesia Department ICU<br/> Grip, Jonathan; Karolinska Institute, Department of Perioperative Medicine and Intensive Care<br/> Cronhjort, Maria; Karolinska Institute, Department of Clinical Science and Education Södersjukhuset<br/> Oldner, Anders; Karolinska Institute, Department of Perioperative Medicine and Intensive Care<br/> Svensen, Christer; Karolinska Institute, Department of Clinical Science and Education Södersjukhuset<br/> Mårtensson, Johan; Karolinska Institute, Department of Perioperative Medicine and Intensive Care</p> |
| Keywords:                     | Adult intensive & critical care < ANAESTHETICS, COVID-19, DIABETES & ENDOCRINOLOGY, General diabetes < DIABETES & ENDOCRINOLOGY                                                                                                                                                                                                                                                                                                                                                                                                                                                                                                                                                                                                                                                                                            |
|                               |                                                                                                                                                                                                                                                                                                                                                                                                                                                                                                                                                                                                                                                                                                                                                                                                                            |

SCHOLARONE™  
Manuscripts

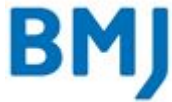

I, the Submitting Author has the right to grant and does grant on behalf of all authors of the Work (as defined in the below author licence), an exclusive licence and/or a non-exclusive licence for contributions from authors who are: i) UK Crown employees; ii) where BMJ has agreed a CC-BY licence shall apply, and/or iii) in accordance with the terms applicable for US Federal Government officers or employees acting as part of their official duties; on a worldwide, perpetual, irrevocable, royalty-free basis to BMJ Publishing Group Ltd ("BMJ") its licensees and where the relevant Journal is co-owned by BMJ to the co-owners of the Journal, to publish the Work in this journal and any other BMJ products and to exploit all rights, as set out in our [licence](#).

The Submitting Author accepts and understands that any supply made under these terms is made by BMJ to the Submitting Author unless you are acting as an employee on behalf of your employer or a postgraduate student of an affiliated institution which is paying any applicable article publishing charge ("APC") for Open Access articles. Where the Submitting Author wishes to make the Work available on an Open Access basis (and intends to pay the relevant APC), the terms of reuse of such Open Access shall be governed by a Creative Commons licence – details of these licences and which [Creative Commons](#) licence will apply to this Work are set out in our licence referred to above.

Other than as permitted in any relevant BMJ Author's Self Archiving Policies, I confirm this Work has not been accepted for publication elsewhere, is not being considered for publication elsewhere and does not duplicate material already published. I confirm all authors consent to publication of this Work and authorise the granting of this licence.

# Chronic dysglycemia in critically ill patients with Covid-19 – a retrospective cohort study

Anca Balintescu, MD<sup>1, 2</sup>; Susanne Rysz, MD<sup>3, 4</sup>; Carl Hertz, MD<sup>2</sup>; Jonathan Grip, MD, PhD<sup>3, 5</sup>; Maria Cronhjort, MD, PhD<sup>1, 2</sup>; Anders Oldner MD, PhD<sup>3, 6</sup>; Christer Svensen MD, PhD<sup>1, 2</sup>; Johan Mårtensson, MD, PhD<sup>3, 6</sup>

<sup>1</sup> Department of Clinical Science and Education Karolinska Institute, Unit of Anesthesiology and Intensive Care, South General Hospital, Sjukhusbacken 10, 11883 Stockholm, Sweden

<sup>2</sup> Department of Anesthesia and Intensive Care, South General Hospital, Sjukhusbacken 10, 11883 Stockholm, Sweden

<sup>3</sup> Department of Perioperative Medicine and Intensive Care, Karolinska University Hospital, Norrbacka S2:05, SE-17176 Stockholm, Sweden

<sup>4</sup> Department of Medicine, Solna, Karolinska Institute, Stockholm, Sweden

<sup>5</sup> Department of Clinical Science, Intervention and Technology, Karolinska Institute, Stockholm, Sweden

<sup>6</sup> Department of Physiology and Pharmacology, Section of Anaesthesia and Intensive Care, Karolinska Institutet, Norrbacka S2:05, SE-17176 Stockholm, Sweden

## Corresponding Author:

Anca Balintescu, ANOPIVA, Södersjukhuset, Sjukhusbacken 10, 11883 Stockholm, Sweden. Phone: +46 (0)722 7023 83. Fax: +46 (0)8-616 22 08. Email: [anca.balintescu@ki.se](mailto:anca.balintescu@ki.se)

Keywords: HbA1c, ICU, Covid-19, prevalence, glycemic control, diabetes

## Abstract

**Objective:** Using glycated hemoglobin A1c (HbA1c) screening, we aimed to determine the prevalence of chronic dysglycemia (prediabetes or diabetes) among patients with Covid-19 admitted to the intensive care unit (ICU). Additionally, we aimed to explore the association between chronic dysglycemia and clinical outcomes related to ICU stay.

**Design:** Multicenter prospective observational study

**Setting:** ICUs in three hospitals in Stockholm, Sweden

**Participants:** Covid-19 patients admitted to the ICU between 5 March and 13 August 2020 with available HbA1c at admission. Chronic dysglycemia was determined based on previous history of diabetes and HbA1c.

**Primary and secondary outcomes measures:** Primary outcome was the actual prevalence of chronic dysglycemia (prediabetes, unknown diabetes, or known diabetes) among Covid-19 patients. Secondary outcome was the association of chronic dysglycemia with 90-day mortality, ICU length of stay, duration of invasive mechanical ventilation (IMV), and renal replacement therapy (RRT) use, accounting for treatment selection bias.

**Results:** A total of 308 patients with available admission HbA1c were included. Chronic dysglycemia prevalence assessment was restricted to 206 patients admitted to three ICUs in which HbA1c was measured on all admitted patients. Chronic dysglycemia was present in 82.0% (95% CI 76.1%-87.0%) of patients, with prediabetes present in 40.2% (95% CI 33.5%-47.3%), unknown diabetes in 20.9% (95% CI 15.5%-27.1%), well-controlled diabetes in 7.8% (95% CI 4.5%-12.3%), and uncontrolled diabetes in 13.1% (95% CI 8.8%-18.5%). All patients with available HbA1c were included for the analysis of the relationship between chronic

dysglycemia and secondary outcomes. We found no independent association between chronic dysglycemia and 90-day mortality, ICU length of stay, duration of IMV or RRT use. Risk estimates remained virtually unchanged after excluding patients with specific treatment limitations.

**Conclusions:** In our cohort of critically ill Covid-19 patients, the prevalence of chronic dysglycemia was 82%. We found no association between chronic dysglycemia and clinical outcomes.

### **Strengths and limitations of this study**

- Presents prevalence of chronic dysglycemia in an ICU population with Covid-19 based on additional quantification of admission HbA1c
- Actual prevalence of chronic dysglycemia calculation in all ICU admitted patients, reducing the risk of ascertainment bias
- Treatment limitations were considered in the analysis of clinical outcomes, thereby reducing the risk of treatment selection bias.
- We lack data on glycemetic control during ICU stay, that might have influenced clinical outcomes

### **Background**

Diabetes has been identified as a frequent comorbidity in patients with Covid-19, with a prevalence ranging from 7.4% to 34.3% among those requiring hospitalization [1-3]. A meta-analysis published in April 2020 found diabetes to be the second most

1  
2  
3 frequent comorbidity in patients with Covid-19 admitted to the intensive care unit  
4  
5 (ICU) [4]. Furthermore, Covid-19 patients with diabetes appear to have a significantly  
6  
7 higher risk of ICU admission and worse prognosis than Covid-19 patients without  
8  
9 diabetes [4-6]. Particularly, a glycated hemoglobin A1c (HbA1c) level above 7% (53  
10  
11 mmol/mol) was identified as risk factor for ICU admission [7].  
12  
13

14  
15 Recent data also indicates that diabetes is associated with worse prognosis among  
16  
17 ICU patients with Covid-19 [8]. However, these studies did not include HbA1c  
18  
19 measurements to identify patients with prediabetes or previously undiagnosed  
20  
21 diabetes. This is an important limitation since both prediabetes and diabetes is  
22  
23 considerably under-diagnosed both in the community [9] and in the ICU [10].  
24  
25

26  
27 Additionally, a history of diabetes diagnosis and HbA1c at ICU admission, measured  
28  
29 in consecutively admitted patients, is important in determining the true prevalence of  
30  
31 chronic dysglycemia in the critically ill Covid-19 population. Finally, information about  
32  
33 limitations of life-sustaining treatment were not considered in previous outcome  
34  
35 analyses. This is unfortunate since the presence of such limitations may introduce  
36  
37 treatment selection bias.  
38  
39

40  
41 We therefore conducted a multicenter observational study using quantification of  
42  
43 HbA1c and information about diabetes history to determine the actual prevalence of  
44  
45 chronic dysglycemia (prediabetes, unknown diabetes, or known diabetes) among  
46  
47 Covid-19 patients admitted to ICU. In addition, we aimed to explore the relationship  
48  
49 of chronic dysglycemia with 90-day mortality, ICU length of stay, duration of invasive  
50  
51 mechanical ventilation (IMV) and severe acute kidney injury requiring renal  
52  
53 replacement therapy (RRT) accounting for treatment selection bias. We hypothesised  
54  
55 that prevalence of chronic dysglycemia in Covid-19 patients admitted to the ICU  
56  
57 exceeds the prevalence of chronic dysglycemia in the non Covid-19 critically ill  
58  
59  
60

1  
2  
3 population. Moreover, we hypothesised that such chronic dysglycemia would be  
4  
5 associated with worse clinical outcomes during ICU stay in patients with Covid-19.  
6  
7  
8  
9

## 10 11 12 **Material and Methods**

13  
14 The study was approved by the Swedish Ethical Review Authority (approval number  
15  
16 2020-01302, amendment 2020-02890) with a waiver of informed consent. The study  
17  
18 was performed in accordance with the Helsinki Declaration and reported in  
19  
20 conformity with the STROBE statement [11]  
21  
22

23  
24 Patient and Public Involvement statement: The study is based on data that was  
25  
26 collected during the ongoing Covid-19 pandemic in a quality register. No intervention  
27  
28 was applied to the individual patient. The public and patients were not involved in the  
29  
30 design of the study. Results are to be disseminated to the public and scientific  
31  
32 community through publication in peer-reviewed journal with open access.  
33  
34  
35  
36  
37

### 38 *Study design*

39  
40 We conducted a multicenter, prospective observational study of adult ( $\geq 18$  years)  
41  
42 patients with a positive polymerase chain reaction (PCR) for severe acute respiratory  
43  
44 syndrome coronavirus 2 (SARS-CoV-2) admitted to ten ICUs in three hospitals in  
45  
46 Stockholm, Sweden between March 5<sup>th</sup> and August 13<sup>th</sup>, 2020 (first wave). We  
47  
48 excluded patients without HbA1c obtained on admission to the ICU, patients in the  
49  
50 third trimester of pregnancy and patients with a primary admission diagnosis other  
51  
52 than Covid-19. In patients with multiple ICU admissions, only the first admission was  
53  
54 considered. All included patients were assessed in the outcome analyses.  
55  
56  
57

58  
59 Assessment of chronic dysglycemia prevalence was restricted to a nested cohort of  
60



1  
2  
3 patients from ICUs in which HbA1c measurement was included in the routine  
4  
5 laboratory panel performed on all consecutive admissions. In the prevalence  
6  
7 analysis, we therefore excluded patients with available HbA1c who were admitted to  
8  
9 ICUs in which HbA1c was measured only at the discretion of the treating clinicians.  
10  
11  
12  
13

#### 14 *Data collection*

15  
16 HbA1c was measured in whole blood at ICU admission using the VARIANT II  
17  
18 TURBO Hemoglobin Testing System analyzer (Bio-Rad Laboratories GmbH) and  
19  
20 was reported in mmol/mol (IFCC calibrated) and in %. HbA1c was measured as part  
21  
22 of routine care in three ICUs and at the discretion of the treating clinician in seven  
23  
24 ICUs. We collected information on demographics, comorbidity, chronic medication,  
25  
26 HbA1c value, mortality and decision regarding limitation of life-sustaining care from  
27  
28 the patients' medical records (Take Care [CompuGroup Medical, Koblenz,  
29  
30 Germany]). International Classification of Disease (ICD) 10 codes were used to  
31  
32 identify comorbidity and previous history of diabetes. Additionally, data regarding  
33  
34 known diabetes diagnosis was extracted manually from the patients' medical records.  
35  
36  
37  
38  
39 Data on body mass index (BMI), Simplified Acute Physiology Score (SAPS) 3, ICU  
40  
41 length of stay, duration of IMV and RRT were collected from the ICU electronic  
42  
43 patient data management system Clinisoft (GE, Barrington, IL).  
44  
45  
46  
47  
48

#### 49 *Prediabetes and Diabetes definitions*

50  
51 Prediabetes and diabetes were diagnosed based on two complementary methods;  
52  
53 level of HbA1c at admission and previous medical history of diabetes, and  
54  
55 categorized into five groups:  
56  
57

58 (1) no diabetes (HbA1c <42 mmol/mol [6.0%] and no history of diabetes)  
59  
60

1  
2  
3 (2) prediabetes (HbA1c 42-47 mmol/mol [6.0-6.4%] and no history of diabetes)

4  
5 (3) unknown diabetes (HbA1c  $\geq$ 48 mmol/mol [6.9 %] and no history of diabetes)

6  
7 (4) controlled diabetes (HbA1c  $<$ 52 mmol/mol [6.9 %] and previous history of  
8  
9 diabetes)

10  
11 (5) uncontrolled diabetes (HbA1c  $\geq$ 52 mmol/mol [6.9 %] and previous history of  
12  
13 diabetes).

14  
15 Cut off values for HbA1c according to the World Health Organization were used [12].

16  
17 Individuals in group (2), (3), (4) and (5) were considered to have chronic dysglycemia  
18  
19 compared to those in group (1) labeled “no chronic dysglycemia”.

## 20 21 22 23 24 25 26 *Outcomes*

27  
28 The primary outcome was the prevalence of chronic dysglycemia. Secondary  
29  
30 outcomes included 90-day mortality, ICU length of stay, duration of IMV, and RRT  
31  
32 use.

## 33 34 35 36 37 *Statistical Analysis*

38  
39 We analyzed data using STATA version 12.1 (Stata Corp., College Station, Texas).  
40  
41 Categorical data is presented as numbers and percentages and compared using the  
42  
43 chi-square test or Fisher's exact test. Continuous data is summarized as median with  
44  
45 interquartile range (IQR) and compared using the Mann-Whitney U test (for two  
46  
47 groups) or the Kruskal Wallis test (for multiple groups). The prevalence of chronic  
48  
49 dysglycemia (primary outcome) was presented as percentages with 95% confidence  
50  
51 intervals (CI). We displayed time to death within 90 days using Kaplan-Meier curves.  
52  
53 Survival curves were compared using a log-rank test. We used multivariable Cox  
54  
55 regression analysis to assess the association between chronic dysglycemia and 90-  
56  
57  
58  
59  
60

day mortality. We used multivariable linear regression analysis to assess the association with ICU length of stay and duration of IMV. Both these outcomes were found to be well approximated by log-normal distributions and were therefore log-transformed before analysis with results presented as geometric means (95% CI). We used multivariable logistic regression analysis to assess the association with RRT use, before and after excluding patients with RRT as a treatment limitation. All regression models were adjusted for the following predetermined confounders: SAPS 3, age and sex. A two-sided P-value <0.05 was considered statistically significant.

## Results

### Patients

A total of 584 patients with positive SARS-CoV-2 test were admitted to the study ICUs during the study period. We excluded 225 patients without available HbA1c, six pregnant patients, 16 readmissions and 29 patients without symptoms associated with Covid-19. Therefore, we included 308 patients with available HbA1c for outcome analysis. Among those 308 patients, 206 consequently admitted patients in which HbA1c was included in the admission routine laboratory panel were used for prevalence calculation (Figure 1). Baseline characteristics and treatment limitations of the entire study population are detailed in Table 1.

**Table 1.** Baseline characteristics and treatment limitations

| Characteristic                                   | Chronic dysglycemia    |             |                  |                     |                       | P <sup>e</sup> |
|--------------------------------------------------|------------------------|-------------|------------------|---------------------|-----------------------|----------------|
|                                                  | No chronic dysglycemia | Prediabetes | Unknown diabetes | Controlled diabetes | Uncontrolled diabetes |                |
| No. (%)                                          | 61 (19.8)              | 114 (37.0)  | 60 (19.4)        | 25 (8.11)           | 48 (15.5)             |                |
| Age, years                                       | 57 (51,63)             | 61 (53, 68) | 60 (52, 68)      | 63 (57, 71)         | 62 (55,69)            | 0.02           |
| Male sex                                         | 48 (78.6)              | 92 (80.7)   | 47 (78.3)        | 21 (84.0)           | 36 (75.0)             | 0.90           |
| Body mass index <sup>a</sup> , kg/m <sup>2</sup> | 27 (25, 32)            | 27 (25, 30) | 28 (25, 31)      | 29 (26, 32)         | 30 (26, 33)           | 0.97           |
| HbA1c, mmol/mol                                  | 39 (36, 40)            | 44 (43, 46) | 51 (49, 57)      | 47 (44, 49)         | 70 (61, 81)           | <0.001         |
| Diabetes treatment                               |                        |             |                  |                     |                       |                |
| Diet only                                        |                        |             |                  | 6 (24.0)            | 2 (4.1)               |                |
| OAD only                                         |                        |             |                  | 17 (68)             | 19 (39.5)             |                |

|                                        |             |             |             |             |             |      |
|----------------------------------------|-------------|-------------|-------------|-------------|-------------|------|
| Insulin only                           |             |             |             | 1 (4.0)     | 12 (25.0)   |      |
| OAD+Insulin                            |             |             |             | 1 (4.0)     | 15 (31.2)   |      |
| Comorbidity                            |             |             |             |             |             |      |
| Hypertension                           | 18 (29.5)   | 40 (35.0)   | 23 (38.3)   | 16 (64.0)   | 34 (70.8)   | 0.02 |
| Heart failure                          | 6 (9.8)     | 5 (4.3)     | 6 (10.0)    | 0 (0.0)     | 3 (6.2)     | 0.24 |
| Previous myocardial infarction         | 2 (3.2)     | 4 (3.5)     | 6 (10.0)    | 0 (0.0)     | 7 (14.5)    | 0.38 |
| Chronic kidney disease                 | 4 (6.5)     | 13 (11.4)   | 7 (11.6)    | 6 (24.0)    | 11 (22.9)   | 0.09 |
| Liver disease                          | 2 (3.2)     | 4 (3.5)     | 1 (1.6)     | 1 (4.0)     | 1 (2.0)     | 1.00 |
| Any malignancy                         | 0 (0.0)     | 8 (7.0)     | 2 (3.3)     | 2 (8.0)     | 4 (8.3)     | 0.04 |
| Astma/COPD                             | 13 (21.3)   | 20 (17.5)   | 14 (23.3)   | 5 (20.0)    | 9 (18.7)    | 0.72 |
| SAPS 3 <sup>b</sup>                    | 53 (48, 60) | 55 (49, 60) | 57 (52, 62) | 59 (52, 63) | 56 (52, 69) | 0.18 |
| Chronic drug use                       |             |             |             |             |             |      |
| Corticosteroids <sup>c</sup>           | 5 (8.20)    | 16 (14.04)  | 8 (13.3)    | 4 (16.0)    | 6 (12.5)    | 0.24 |
| Immunosuppressive therapy <sup>d</sup> | 1 (1.6)     | 8 (7.0)     | 3 (5.0)     | 1 (4.0)     | 1(2.0)      | 0.31 |
| Treatment limitations <sup>f</sup>     |             |             |             |             |             |      |
| Any limitation                         | 14 (22.9)   | 19 (16.6)   | 13 (21.6)   | 8 (32.0)    | 13 (27.0)   | 0.80 |
| No RRT                                 | 5 (8.2)     | 7 (6.1)     | 5 (8.3)     | 5 (20.0)    | 6 (12.5)    | 0.78 |
| No IMV                                 | 6 (9.8)     | 10 (8.7)    | 4 (6.6)     | 4 (16.0)    | 6 (12.5)    | 0.97 |
| No CPR                                 | 9 (14.7)    | 19 (16.6)   | 12 (20.0)   | 8 (32.0)    | 12 (25.0)   | 0.29 |
| No ECMO                                | 7 (11.4)    | 3 (2.6)     | 5 (8.3)     | 3 (12.0)    | 3 (6.2)     | 0.10 |
| Palliative care <sup>g</sup>           | 1 (1.6)     | 18 (16.5)   | 7 (12.2)    | 4 (16.6)    | 5 (10.8)    | 0.03 |

Data are n (%) or median (interquartile range)

HbA1c, glycated hemoglobin A1c; OAD, oral hypoglycemic agent; COPD, Chronic obstructive pulmonary disease; SAPS, Simplified Acute Physiology Score, 2 missing values (306 patients with data); RRT, renal replacement therapy; IMV, invasive mechanical ventilation; CPR, cardiopulmonary resuscitation

<sup>a</sup>Missing data in 15 patients (293 patients with data)

<sup>b</sup>Missing data in 2 patients (306 patients with data)

<sup>c</sup>Systemic or inhaled corticosteroids

<sup>d</sup>Immunosuppressive therapy was defined as: treatment with Metotrexate, Azathioprin, Ciklosporin, Tracolimus, Infliximab

<sup>e</sup>P values for the comparison between no chronic dysglycemia and chronic dysglycemia

<sup>f</sup>Decision taken any time during ICU stay

<sup>g</sup>Decision to go over to palliative care taken during ICU stay

Patients with chronic dysglycemia were older, were more likely to have hypertension, malignancy and/or chronic kidney disease, and had higher SAPS 3 than patients without chronic dysglycemia. Overall, 14 (22.9%) patients in the no chronic dysglycemia group and 53 (21.5%) patients in the chronic dysglycemia group received one or more limitations of life-supporting therapies during their ICU stay. “No Cardiopulmonary resuscitation (CPR)” was the most common treatment limitation. We observed the highest proportion of limitations among patients with known (controlled or uncontrolled) diabetes. Decision to switch to palliative care was made in 1 (1.6%) patient in the no chronic dysglycemia group and 34 (13.8%) patients in the chronic dysglycemia group (P=0.03). Cumulative percentage of treatment limitations relative ICU admission is displayed in Figures S1-S4.

### Primary outcome

In the nested cohort of 206 consecutive patients with available HbA1c, 169 (82.0%; 95% CI 76.1%-87.0%) were diagnosed with chronic dysglycemia. Prediabetes was present in 83 (40.2%, 95% CI 33.5%-47.3%), unknown diabetes in 43 (20.9%, 95% CI 15.5%-27.1%), well-controlled diabetes in 16 (7.8%, 95% CI 4.5%-12.3%), and uncontrolled diabetes in 27 (13.1%, 95% CI 8.8%-18.5%) patients (Figure 2).

### Secondary outcomes

Nine (14.7%) patients in the no chronic dysglycemia group and 62 (25.1%) patients in the chronic dysglycemia group died within 90 days ( $P=0.08$ ) (Table 2, Figure 3 and Figure S5). ICU length of stay and duration of IMV were similar in the two groups. IMV was delivered to 42 (68.8%) patients without chronic dysglycemia and to 187 (75.7%) patients with chronic dysglycemia ( $P=0.27$ ). RRT was delivered to 17 (27.9%) no chronic dysglycemia patients and 42 (17.0%) chronic dysglycemia patients ( $P=0.06$ ) (Table 2 and Table 3).

**Table 2.** Secondary outcomes

| Outcomes                              | Chronic dysglycemia             |                       |                           |                              |                                | P <sup>a</sup> |
|---------------------------------------|---------------------------------|-----------------------|---------------------------|------------------------------|--------------------------------|----------------|
|                                       | No chronic dysglycemia (n = 61) | Prediabetes (n = 114) | Unknown diabetes (n = 60) | Controlled diabetes (n = 25) | Uncontrolled diabetes (n = 48) |                |
| 90-day mortality, n (%)               | 9 (14.7)                        | 28 (24.5)             | 12 (20.0)                 | 7 (28.0)                     | 15 (31.2)                      | 0.08           |
| ICU length of stay, days              | 9 (4, 25)                       | 14 (6, 24)            | 13 (6, 28)                | 8 (5, 21)                    | 11 (7, 22)                     | 0.69           |
| Invasive mechanical ventilation, days | 16 (8, 29)                      | 14 (10, 23)           | 15 (10, 27)               | 15 (6, 21)                   | 14 (9, 22)                     | 0.60           |
| Renal replacement therapy, n (%)      | 17 (27.9)                       | 22 (19.3)             | 11 (18.3)                 | 1 (4.0)                      | 8 (16.6)                       | 0.06           |

Data are n (%) or median (interquartile range)

ICU lengths of stay (4 missing values because of transfer to other hospital)

<sup>a</sup>P values for the comparison between no chronic dysglycemia and chronic dysglycemia

**Table 3.** Multivariable regression analyses showing the association of chronic dysglycemia (versus no chronic dysglycemia) with secondary outcomes

| Outcome measure                                 | No Chronic Dysglycemia | Chronic Dysglycemia | Adjusted Risk Estimate (95% CI) <sup>a</sup> | Statistical test    | P Value |
|-------------------------------------------------|------------------------|---------------------|----------------------------------------------|---------------------|---------|
| 90-day mortality, n (%)                         | 9/61 (14.7)            | 62/247 (25.1)       | 1.61 (0.79 to 3.26)                          | Cox regression      | 0.18    |
| ICU length of stay, days                        |                        |                     |                                              |                     |         |
| All patients                                    | 9 (4, 25)              | 13 (6, 23)          | 1.06 (0.78 to 1.43)                          | Linear regression   | 0.70    |
| ICU survivors <sup>b</sup>                      | 9 (5, 27)              | 14 (7, 24)          | 1.04 (0.76 to 1.43)                          | Linear regression   | 0.75    |
| Invasive mechanical ventilation duration, days  |                        |                     |                                              |                     |         |
| All patients <sup>c</sup>                       | 16 (8, 29)             | 14 (10, 23)         | 0.92 (0.68 to 1.23)                          | Linear regression   | 0.58    |
| ICU survivors <sup>d</sup>                      | 16 (8, 30)             | 15 (10, 23)         | 0.93 (0.70 to 1.23)                          | Linear regression   | 0.61    |
| Renal replacement therapy, n (%)                |                        |                     |                                              |                     |         |
| All patients                                    | 17/61 (27.9)           | 42/247 (17.0)       | 0.52 (0.26 to 1.02)                          | Logistic regression | 0.06    |
| Patients without treatment limitation as no RRT | 17/57 (29.8)           | 42/224 (18.8)       | 0.52 (0.26 to 1.04)                          | Logistic regression | 0.10    |

<sup>a</sup>Multivariable models were adjusted for Simplified Acute Physiology Score (SAPS) 3, age and sex.

<sup>b</sup>ICU length of stay in ICU survivors, 260 observations

<sup>c</sup>Invasive mechanical ventilation duration, 227 observations

<sup>d</sup>Invasive mechanical ventilation duration in ICU survivors, 189 observations

On multivariable regression analysis we observed a trend towards higher mortality (adjusted HR 1.61, 95% CI 0.79-3.26, P=0.18) and lower RRT use (adjusted OR 0.52, 95% CI 0.26-1.02, P=0.06) in patients with chronic dysglycemia (Table 3). The association with RRT use remained virtually unchanged after exclusion of patients with “No RRT” as treatment limitation.

## Discussions

### Key findings

We performed a multicenter observational investigation to determine the prevalence of chronic dysglycemia and its impact on clinical outcomes among Covid-19 patients admitted to ICU. Using available information about the patients’ diabetic status in combination with routine HbA1c assessment, we found that 82% had chronic

1  
2  
3     dysglycemia with two thirds having either prediabetes or undiagnosed diabetes. We  
4  
5     observed a trend towards increased 90-day mortality in patients with chronic  
6  
7     dysglycemia, with the highest mortality (31%) observed among those with  
8  
9     uncontrolled diabetes. Conversely, the proportion of patients receiving RRT was  
10  
11     lower among patients with chronic dysglycemia even when patients without “No RRT”  
12  
13     as treatment limitation were considered separately. We found no association of  
14  
15     chronic dysglycemia with ICU length of stay or duration of IMV.  
16  
17  
18  
19  
20

### 21     *Relationship with previous studies*

22  
23     A global meta-analysis of more than 16000 ICU patients with Covid-19 suggests a  
24  
25     pooled prevalence of known diabetes between 23-31% [13], close to the observed  
26  
27     prevalence in our study (21%). However, few studies have used additional HbA1c  
28  
29     measurements to assess the actual prevalence of chronic dysglycemia, including  
30  
31     prediabetes and undiagnosed diabetes. One such ICU study from Austria found a  
32  
33     prevalence of chronic dysglycemia of 85%, which is in close agreement with our  
34  
35     findings [14]. However, the Austrian study did not assess consecutive patients and  
36  
37     may therefore be prone to selection bias.  
38  
39  
40

41  
42     Our findings indicate that chronic dysglycemia is more common in Covid-19 patients  
43  
44     than in ICU patients with other admission diagnoses. In fact, in a pre-Covid-19 cohort  
45  
46     of general ICU patients we found a corresponding dysglycemia prevalence of 33%  
47  
48     [10]. The relationship between severe SARS-CoV-2 infection and dysglycemia has  
49  
50     different potential explanations. SARS-CoV-2 enters cells in various organs, including  
51  
52     the pancreas, via angiotensin-converting enzyme II (ACE2). As ACE2 is involved in  
53  
54     regulating pancreatic beta-cell function, a link between SARS-CoV-2 infection and  
55  
56     beta-cell dysfunction and diabetes development has been suggested [15].  
57  
58  
59  
60

1  
2  
3 Interestingly, the prevalence of elevated HbA1c below the diabetes diagnostic  
4 threshold (prediabetes) was markedly higher in our Covid-19 cohort than in our  
5 previous pre-Covid-19 cohort (40% vs 9%). It is possible that the duration of Covid-  
6 19 symptoms before ICU admission (typically ten days in the literature [16]) was  
7 sufficient to trigger new onset hyperglycemia with mildly elevated HbA1c.  
8  
9

10  
11 In addition to the above speculations about SARS-CoV-2 as a *cause* of dysglycemia,  
12 there is also evidence suggesting that patients with preexisting dysglycemia are  
13 prone to a more severe course of Covid-19. For example, some studies have shown  
14 that hospitalized SARS-CoV-2 positive with prediabetes, unknown diabetes, and  
15 known poorly controlled diabetes are at increased risk of SARS-CoV-2 associated  
16 respiratory failure requiring intensive care [17]. A higher burden of comorbidities,  
17 hyperglycemia *per se*, and chronic low-grade inflammation in diabetes may explain  
18 this observation[18].  
19  
20  
21  
22  
23  
24  
25  
26  
27  
28  
29  
30  
31

32  
33 Whether chronic dysglycemia is associated with worse outcomes among Covid-19  
34 patients admitted to ICU remains uncertain. A multicenter study from France  
35 including 410 ICU patients with Covid-19, found no association between the severity  
36 of dysglycemia and tracheal intubation and/or death within 7 days of admission in  
37 patients with diabetes than in those without diabetes [19]. This is in accordance with  
38 the findings of our study. In contrast, others found higher mortality in the subgroup of  
39 mechanically ventilated patients with diabetes [14].  
40  
41  
42  
43  
44  
45  
46  
47  
48

49 We previously demonstrated an independent association between chronic  
50 dysglycemia and need for RRT in critically ill non-Covid-19 patients [10]. This  
51 association was, however, not found in the present study. In fact, we observed a  
52 higher proportion of patients requiring RRT among our patients without chronic  
53 dysglycemia. Exclusion of patients “not for RRT”, did not substantially alter this  
54  
55  
56  
57  
58  
59  
60



1  
2  
3 finding. Importantly, limitations in life-sustaining care were more common in the  
4  
5 known diabetes groups (well controlled and uncontrolled diabetes) than in all other  
6  
7 groups. We cannot exclude the possibility that patients with severe acute or chronic  
8  
9 kidney injury did not reach the ICU because of treatment limitation decisions made at  
10  
11 hospital arrival or on the medical ward. This might have influenced the number of  
12  
13 patients with kidney injury reaching the ICU, affecting predominantly patients with  
14  
15 chronic dysglycemia, as they are usually older and have multiple comorbidities.  
16  
17  
18  
19  
20

### 21 *Strengths and limitations*

22  
23 Our study has several strengths. It is the first to assess the prevalence of chronic  
24  
25 dysglycemia in an ICU population with Covid-19 based on additional quantification of  
26  
27 admission HbA1c. This approach reduced bias due to events that would have  
28  
29 influenced HbA1c values obtained before ICU admission. Additionally, we restricted  
30  
31 the prevalence assessment to a cohort of patients who were admitted to ICUs where  
32  
33 HbA1c was part of the routine laboratory panel, thereby reducing the risk of  
34  
35 ascertainment bias. Furthermore, we considered treatment limitations in our analysis  
36  
37 of clinical outcomes, thereby reducing the risk of treatment selection bias. Finally, we  
38  
39 included patients admitted to ten ICUs in three University hospitals, thus providing a  
40  
41 degree of external validity for applying our findings to similar settings.  
42  
43  
44  
45

46 Our study has limitations. We lack data on conditions and treatment that might have  
47  
48 influenced admission HbA1c, such as haemoglobinopathies and blood transfusion  
49  
50 before ICU admission. In addition, we lack information about glycemic control during  
51  
52 intensive care, which might have modified clinical outcomes.  
53  
54  
55  
56  
57

### 58 **Conclusion**

1  
2  
3 In our multicenter cohort of Covid-19 patients admitted to the ICU, HbA1c screening  
4 diagnosed chronic dysglycemia in four out of five patients with the majority having  
5  
6 diagnosed chronic dysglycemia in four out of five patients with the majority having  
7  
8 either prediabetes or previously undiagnosed diabetes. Chronic dysglycemia was not  
9  
10 significantly associated with mortality, ICU length of stay, duration of invasive  
11  
12 mechanical ventilation or renal replacement therapy use. These findings indicate that  
13  
14 chronic dysglycemia may be a risk factor for severe Covid-19. However, Covid-19  
15  
16 prognosis in the ICU does not appear to be modified by chronic dysglycemia.  
17  
18  
19  
20

## 21 **Acknowledgments**

22  
23 **Author Contributions:** Anca Balintescu, Johan Mårtensson, Maria Cronhjort,  
24  
25 Christer Svensen, Anders Oldner, Jonathan Grip: Conceptualization, Methodology,  
26  
27 Software, reviewing and Editing  
28

29  
30 Anca Balintescu, Susanne Rysz, Carl Hertz: Data curation

31  
32 Anca Balintescu, Johan Mårtensson: Writing- Original draft preparation.

33  
34  
35 **Funding** A.B. and J.M. were supported by Region Stockholm (clinical research  
36  
37 appointment and ALF project grants), grant number 580282.  
38

39  
40 A non-peer-reviewed version of this article has been a part of a publicly defended  
41  
42 PhD thesis ISBN 978-91-8016-719-2 and was submitted to Karolinska Institute Open  
43  
44 Archive, available at <https://openarchive.ki.se/xmlui/handle/10616/48203> on 19  
45  
46 [September 2022](#).  
47  
48

49  
50 **Competing interest:** The authors have no competing interest relevant to this work.

51  
52 **Data availability:** The data that support the findings of this study are available from  
53  
54 the corresponding author upon reasonable request.  
55

56  
57  
58 **Ethics Approval Statement:** The study was approved by the Swedish Ethical  
59  
60 Review Authority (approval number 2020-01302).

## References

- [1] Yang J, Zheng Y, Gou X, Pu K, Chen Z, Guo Q, et al. Prevalence of comorbidities and its effects in patients infected with SARS-CoV-2: a systematic review and meta-analysis. *International Journal of Infectious Diseases* 2020;94:91-5. doi:10.1016/j.ijid.2020.03.017
- [2] Liu Y, Lu R, Wang J, Cheng Q, Zhang R, Zhang S, et al. Diabetes, even newly defined by HbA1c testing, is associated with an increased risk of in-hospital death in adults with COVID-19. *BMC Endocrine Disorders* 2021;21(1):1-10. doi:10.1186/s12902-021-00717-6
- [3] Guan W-j, Liang W-h, Zhao Y, Liang H-r, Chen Z-s, Li Y-m, et al. Comorbidity and its impact on 1590 patients with COVID-19 in China: a nationwide analysis. *European Respiratory Journal* 2020;55(5):2000547. doi:10.1183/13993003.00547-2020
- [4] Roncon L, Zuin M, Rigatelli G, Zuliani G. Diabetic patients with COVID-19 infection are at higher risk of ICU admission and poor short-term outcome. *J Clin Virol* 2020;127:104354. doi:10.1016/j.jcv.2020.104354
- [5] Zhou F, Yu T, Du R, Fan G, Liu Y, Liu Z, et al. Clinical course and risk factors for mortality of adult inpatients with COVID-19 in Wuhan, China: a retrospective cohort study. *The Lancet* 2020;395. doi:10.1016/S0140-6736(20)30566-3
- [6] Guo W, Li M, Dong Y, Zhou H, Zhang Z, Tian C, et al. Diabetes is a risk factor for the progression and prognosis of COVID-19. *Diabetes/metabolism research and reviews* 2020:e3319 doi: 10.1002/dmrr.3319.
- [7] Lei M, Lin K, Pi Y, Huang X, Fan L, Huang J, et al. Clinical Features and Risk Factors of ICU Admission for COVID-19 Patients with Diabetes. *Journal of Diabetes Research* 2020:5237840. doi:10.1155/2020/5237840
- [8] Grasselli G, Greco M, Zanella A, Albano G, Antonelli M, Bellani G, et al. Risk Factors Associated With Mortality Among Patients With COVID-19 in Intensive Care Units in Lombardy, Italy. *JAMA internal medicine* 2020;180(10):1345-55. doi:10.1001/jamainternmed.2020.3539
- [9] Beagley J, Guariguata L, Weil C, Motala AA. Global estimates of undiagnosed diabetes in adults. *Diabetes Research and Clinical Practice* 2014;103(2):150-60. doi:10.1016/j.diabres.2013.11.001
- [10] Balintescu A, Palmgren I, Lipcsey M, Oldner A, Larsson A, Cronhjort M, et al. Prevalence and impact of chronic dysglycemia in intensive care unit patients-A retrospective cohort study. *Acta Anaesthesiol Scand* 2021;65(1):82-91. doi:10.1111/aas.13695
- [11] Erik von Elm DGA, Matthias Egger, Stuart J. Pocock, Peter C. Gøtzsche, and Jan P. Vandembroucke. The Strengthening the Reporting of Observational Studies in Epidemiology (STROBE) Statement: Guidelines for Reporting Observational Studies. *Annals of Internal Medicine* 2007;147(8):573-7. doi:10.7326/0003-4819-147-8-200710160-00010 %m 17938396
- [12] Organisation WH. Use of Glycated Haemoglobin (HbA1c) in the Diagnosis of Diabetes Mellitus, [https://www.who.int/publications/i/item/use-of-glycated-haemoglobin-\(-hba1c\)-in-diagnosis-of-diabetes-mellitus](https://www.who.int/publications/i/item/use-of-glycated-haemoglobin-(-hba1c)-in-diagnosis-of-diabetes-mellitus); [accessed 07 February 2022].
- [13] Tan E, Song J, Deane AM, Plummer MP. Global Impact of Coronavirus Disease 2019 Infection Requiring Admission to the ICU: A Systematic Review and Meta-analysis. *Chest* 2021;159(2):524-36. doi:10.1016/j.chest.2020.10.014
- [14] Klein SJ, Mayerhöfer T, Fries D, Preuß Hernández C, Joannidis M, Collaborators, et al. Elevated HbA1c remains a predominant finding in severe COVID-19 and may be associated with increased mortality in patients requiring mechanical ventilation. *Critical Care* 2021;25(1):1-4. doi:10.1186/s13054-021-03730-2

- 1  
2  
3 [15] Memon B, Abdelalim EM. ACE2 function in the pancreatic islet: Implications for  
4 relationship between SARS-CoV-2 and diabetes. *Acta Physiologica* 2021;233(4):1-13.  
5 doi:10.1111/apha.13733  
6  
7 [16] Larsson E, Brattstrom O, Agvald-Ohman C, Grip J, Jalde FC, Stralin K, et al.  
8 Characteristics and outcomes of patients with COVID-19 admitted to ICU in a tertiary  
9 hospital in Stockholm, Sweden. *Acta anaesthesiologica Scandinavica* 2021;65(1):76-  
10 81. doi:10.1111/aas.13694  
11  
12 [17] Rysz S, Jonsson Fagerlund M, Rimes-Stigare C, Larsson E, Campoccia Jalde F,  
13 Mårtensson J. Chronic dysglycemia and risk of SARS-CoV-2 associated respiratory  
14 failure in hospitalized patients. *Acta anaesthesiologica Scandinavica* 2022;66(1):48-  
15 55. doi:10.1136/bjsports-2021-104080.;  
16  
17 [18] Landstra CP, de Koning EJP. COVID-19 and Diabetes: Understanding the  
18 Interrelationship and Risks for a Severe Course. *Frontiers in endocrinology*  
19 2021;12:649525. doi:10.3389/fendo.2021.649525  
20  
21 [19] Cariou B, Hadjadj S, Wargny M, Pichelin M, Al-Salameh A, Allix I, et al. Phenotypic  
22 characteristics and prognosis of inpatients with COVID-19 and diabetes: the  
23 CORONADO study. *Diabetologia* 2020;63(8):1500-15. doi:10.1007/s00125-020-  
24 05180-x  
25  
26  
27  
28  
29  
30  
31  
32  
33  
34  
35  
36  
37  
38  
39  
40  
41  
42  
43  
44  
45  
46  
47  
48  
49  
50  
51  
52  
53  
54  
55  
56  
57  
58  
59  
60

1  
2  
3 **Figure legends**

4 **Figure 1.** Flow chart of study population

5  
6 **Figure 2.** Prevalence of prediabetes, unknown diabetes and known diabetes among 206  
7 consecutive ICU patients with Covid-19

8  
9 **Figure 3.** Probability of survival in no chronic dysglycemia patients and in patients with  
10 chronic dysglycemi  
11  
12  
13  
14  
15  
16  
17  
18  
19  
20  
21  
22  
23  
24  
25  
26  
27  
28  
29  
30  
31  
32  
33  
34  
35  
36  
37  
38  
39  
40  
41  
42  
43  
44  
45  
46  
47  
48  
49  
50  
51  
52  
53  
54  
55  
56  
57  
58  
59  
60

For peer review only

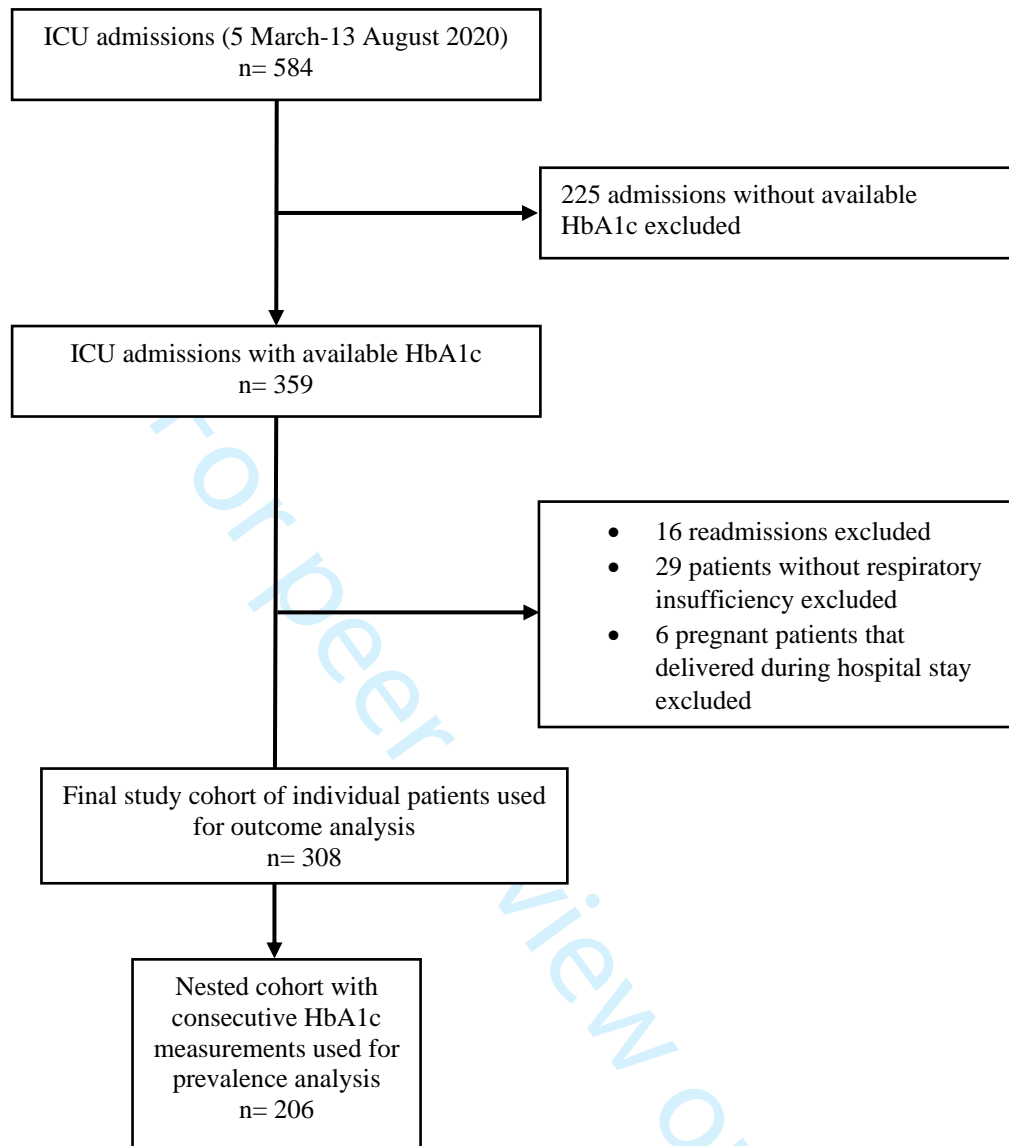

1  
2  
3  
4  
5  
6  
7  
8  
9  
10  
11  
12  
13  
14  
15  
16  
17  
18  
19  
20  
21  
22  
23  
24  
25  
26  
27  
28  
29  
30  
31  
32  
33  
34  
35  
36  
37  
38  
39  
40  
41  
42  
43  
44  
45  
46  
47  
48  
49  
50  
51  
52  
53  
54  
55  
56  
57  
58  
59  
60

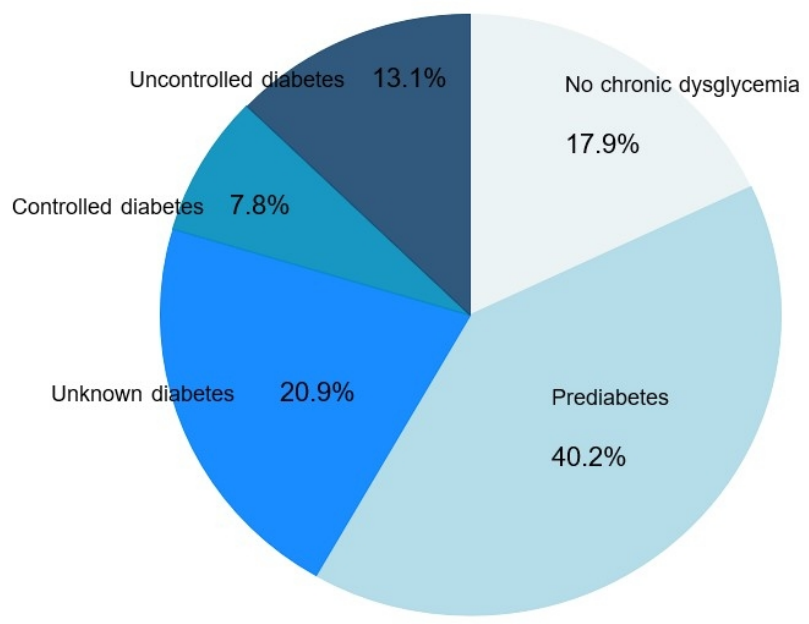

Figure 2. Prevalence of prediabetes, unknown diabetes and known diabetes among 206 consecutive ICU patients with Covid-19

144x102mm (144 x 144 DPI)

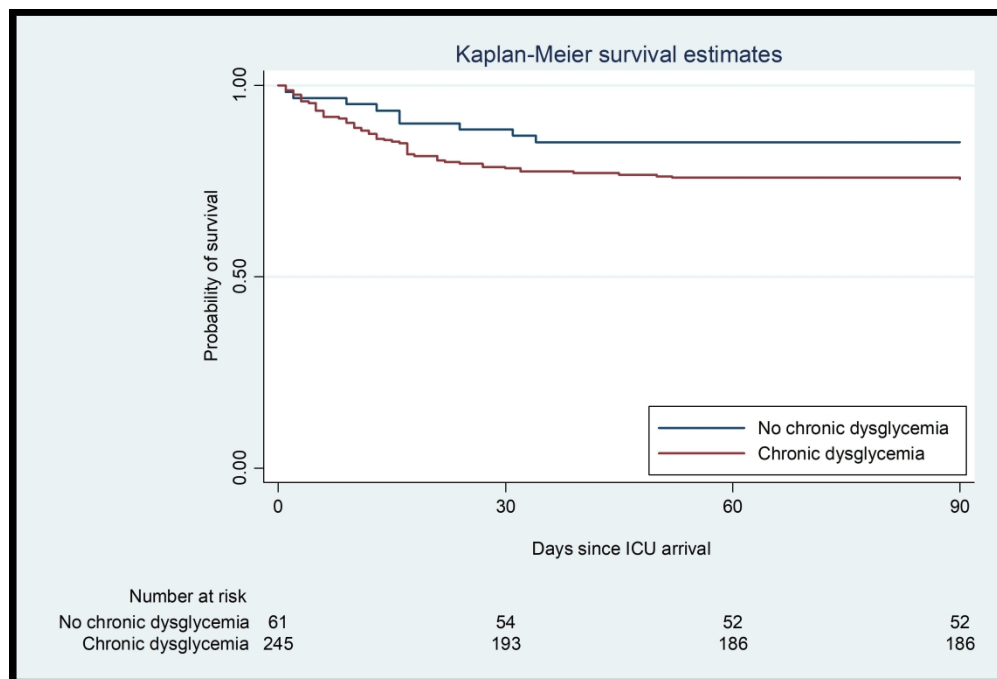

Figure 3. Probability of survival in no chronic dysglycemia patients and in patients with chronic dysglycemi

770x521mm (144 x 144 DPI)



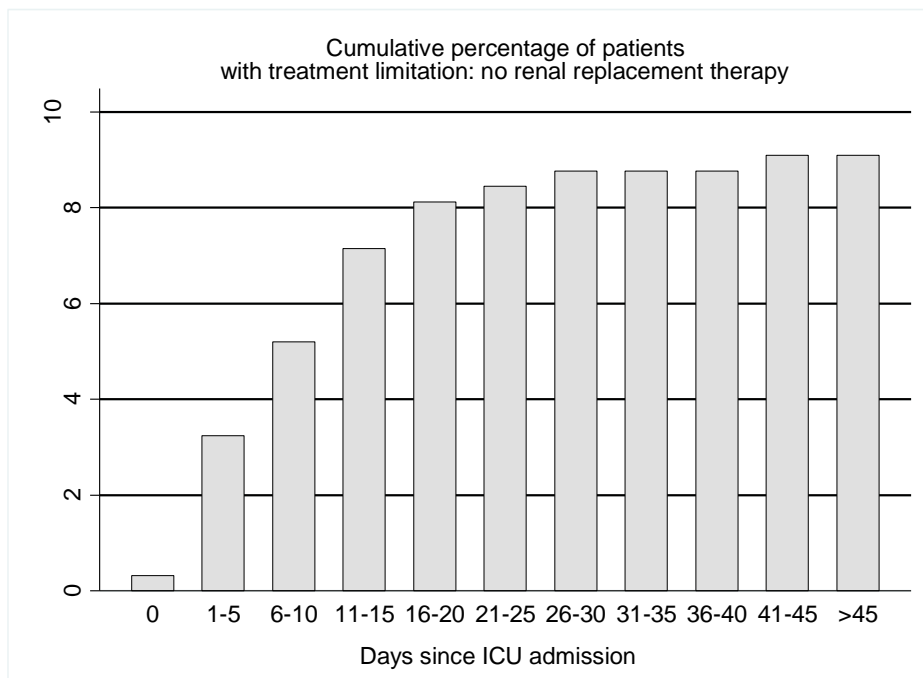

**Figure S1.** Cumulative percentage of patients with a treatment limitation: no renal replacement therapy. Day 0 (zero) denotes the day of admission to the intensive care unit.

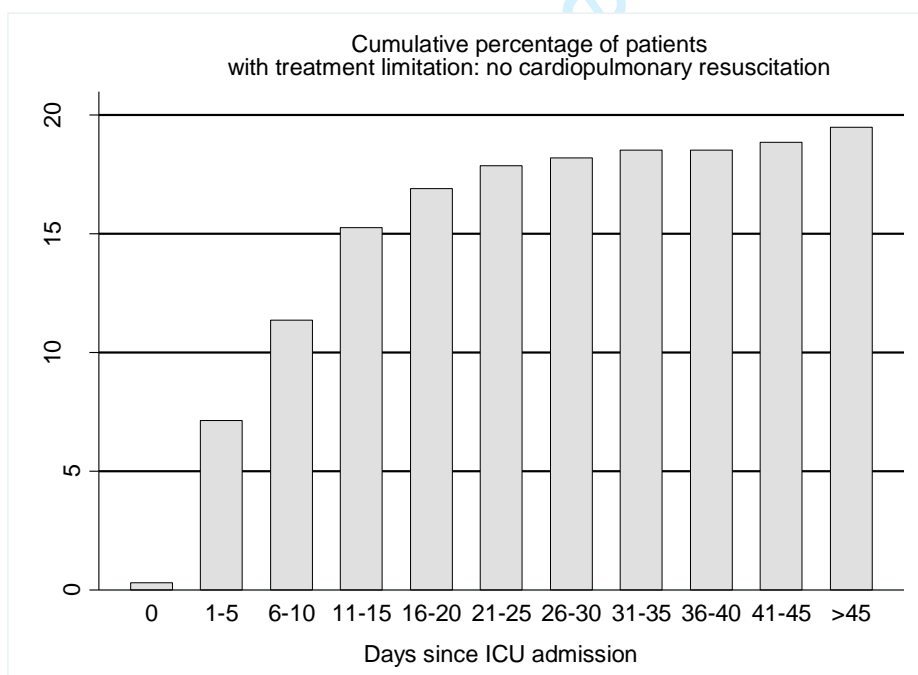

**Figure S2.** Cumulative percentage of patients with a treatment limitation: no cardiopulmonary resuscitation. Day 0 (zero) denotes the day of admission to the intensive care unit.

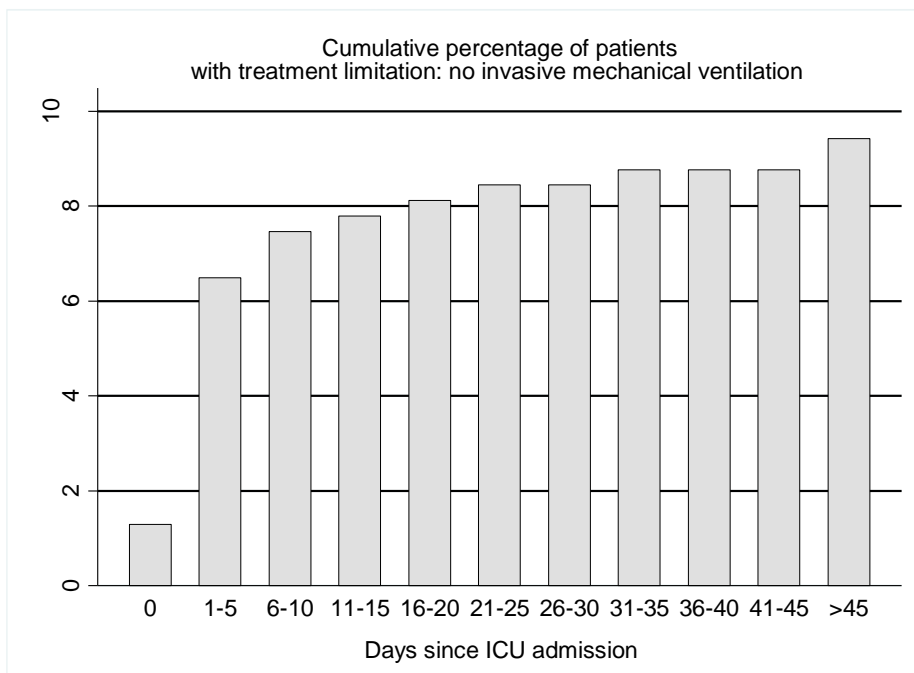

**Figure S3.** Cumulative percentage of patients with a treatment limitation: no invasive mechanical ventilation. Day 0 (zero) denotes the day of admission to the intensive care unit.

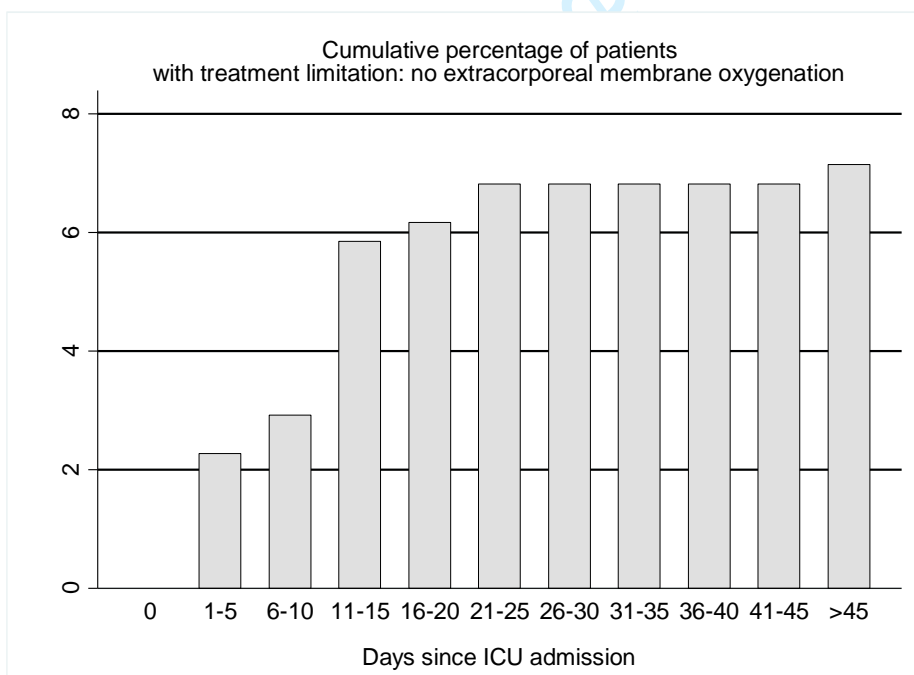

**Figure S4.** Cumulative percentage of patients with a treatment limitation: no extracorporeal membrane oxygenation. Day 0 (zero) denotes the day of admission to the intensive care unit.

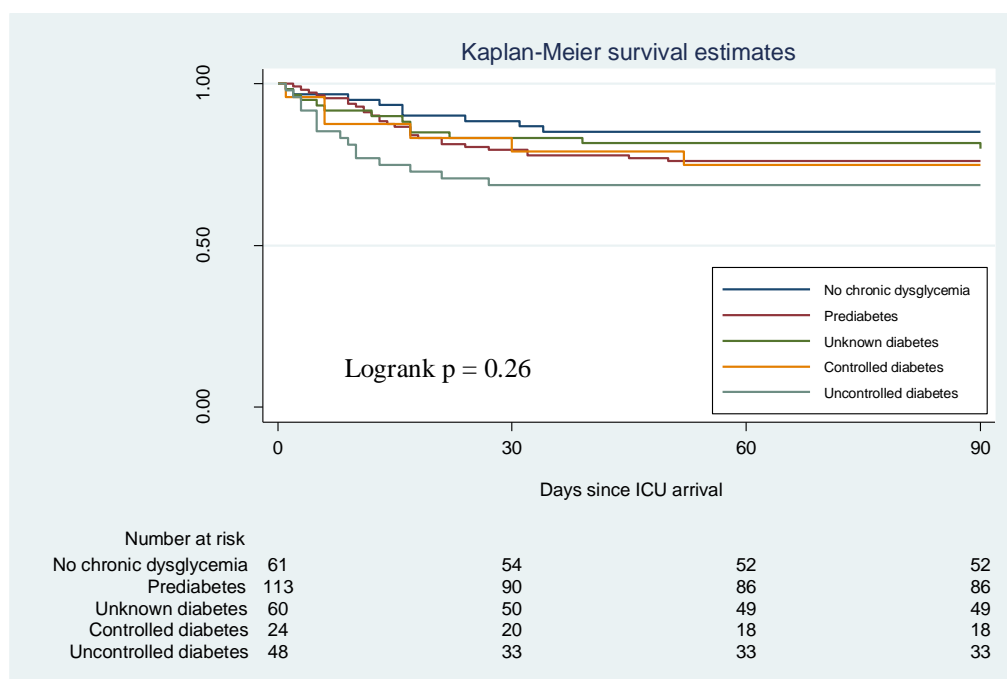

Figure S5. Probability of survival in the study groups

STROBE Statement—Checklist of items that should be included in reports of *cohort studies*

Page references for document: **Chronic dysglycemia in critically ill patients with Covid-19 – a retrospective cohort study**

|                              | Item No | Recommendation                                                                                                                                                                                                                                                                                                         | Page No                                  |
|------------------------------|---------|------------------------------------------------------------------------------------------------------------------------------------------------------------------------------------------------------------------------------------------------------------------------------------------------------------------------|------------------------------------------|
| <b>Title and abstract</b>    | 1       | (a) Indicate the study's design with a commonly used term in the title or the abstract<br>(b) Provide in the abstract an informative and balanced summary of what was done and what was found                                                                                                                          | 1<br>2-3                                 |
| <b>Introduction</b>          |         |                                                                                                                                                                                                                                                                                                                        |                                          |
| Background/rationale         | 2       | Explain the scientific background and rationale for the investigation being reported                                                                                                                                                                                                                                   | 3-4                                      |
| Objectives                   | 3       | State specific objectives, including any prespecified hypotheses                                                                                                                                                                                                                                                       | 4                                        |
| <b>Methods<sup>4</sup></b>   |         |                                                                                                                                                                                                                                                                                                                        |                                          |
| Study design                 | 4       | Present key elements of study design early in the paper                                                                                                                                                                                                                                                                | 4, 5                                     |
| Setting                      | 5       | Describe the setting, locations, and relevant dates, including periods of recruitment, exposure, follow-up, and data collection                                                                                                                                                                                        | 5-6                                      |
| Participants                 | 6       | (a) Give the eligibility criteria, and the sources and methods of selection of participants. Describe methods of follow-up<br>(b) For matched studies, give matching criteria and number of exposed and unexposed                                                                                                      | 5-7<br>NA                                |
| Variables                    | 7       | Clearly define all outcomes, exposures, predictors, potential confounders, and effect modifiers. Give diagnostic criteria, if applicable                                                                                                                                                                               | 7-8                                      |
| Data sources/<br>measurement | 8*      | For each variable of interest, give sources of data and details of methods of assessment (measurement). Describe comparability of assessment methods if there is more than one group                                                                                                                                   | 5-7                                      |
| Bias                         | 9       | Describe any efforts to address potential sources of bias                                                                                                                                                                                                                                                              | 5                                        |
| Study size                   | 10      | Explain how the study size was arrived at                                                                                                                                                                                                                                                                              | 5-6,<br>Figure 1                         |
| Quantitative variables       | 11      | Explain how quantitative variables were handled in the analyses. If applicable, describe which groupings were chosen and why                                                                                                                                                                                           | 6-8                                      |
| Statistical methods          | 12      | (a) Describe all statistical methods, including those used to control for confounding<br>(b) Describe any methods used to examine subgroups and interactions<br>(c) Explain how missing data were addressed<br>(d) If applicable, explain how loss to follow-up was addressed<br>(e) Describe any sensitivity analyses | 7<br>7<br>8<br>NA<br>NA                  |
| <b>Results</b>               |         |                                                                                                                                                                                                                                                                                                                        |                                          |
| Participants                 | 13*     | (a) Report numbers of individuals at each stage of study—eg numbers potentially eligible, examined for eligibility, confirmed eligible, included in the study, completing follow-up, and analysed<br>(b) Give reasons for non-participation at each stage<br>(c) Consider use of a flow diagram                        | 8-9,<br>Figure 1<br>Figure 1<br>Figure 1 |

|    |                  |     |                                                                                                                                          |       |
|----|------------------|-----|------------------------------------------------------------------------------------------------------------------------------------------|-------|
| 1  | Descriptive data | 14* | (a) Give characteristics of study participants (eg demographic, clinical, social) and information on exposures and potential confounders | 8-9   |
| 2  |                  |     |                                                                                                                                          | Table |
| 3  |                  |     |                                                                                                                                          | 1     |
| 4  |                  |     | (b) Indicate number of participants with missing data for each variable of interest                                                      | Table |
| 5  |                  |     |                                                                                                                                          | 1     |
| 6  |                  |     | (c) Summarise follow-up time (eg, average and total amount)                                                                              | NA    |
| 7  |                  |     |                                                                                                                                          |       |
| 8  | Outcome data     | 15* | Report numbers of outcome events or summary measures over time                                                                           | 10-11 |
| 9  |                  |     |                                                                                                                                          | Table |
| 10 |                  |     |                                                                                                                                          | 2-3   |

For peer review only

11  
12  
13  
14  
15  
16  
17  
18  
19  
20  
21  
22  
23  
24  
25  
26  
27  
28  
29  
30  
31  
32  
33  
34  
35  
36  
37  
38  
39  
40  
41  
42  
43  
44  
45  
46  
47  
48  
49  
50  
51  
52  
53  
54  
55  
56  
57  
58  
59  
60

|                                      |                          |    |                                                                                                                                                                                                                                                                                                                                                                                                               |                                  |
|--------------------------------------|--------------------------|----|---------------------------------------------------------------------------------------------------------------------------------------------------------------------------------------------------------------------------------------------------------------------------------------------------------------------------------------------------------------------------------------------------------------|----------------------------------|
| 1<br>2<br>3<br>4<br>5<br>6<br>7<br>8 | Main results             | 16 | (a) Give unadjusted estimates and, if applicable, confounder-adjusted estimates and their precision (eg, 95% confidence interval). Make clear which confounders were adjusted for and why they were included<br>(b) Report category boundaries when continuous variables were categorized<br>(c) If relevant, consider translating estimates of relative risk into absolute risk for a meaningful time period | 10-11<br>Table<br>3              |
| 9<br>10<br>11<br>12                  | Other analyses           | 17 | Report other analyses done—eg analyses of subgroups and interactions, and sensitivity analyses                                                                                                                                                                                                                                                                                                                | 11<br>Figure<br>2,3,S1-<br>4, S5 |
| 13                                   | <b>Discussion</b>        |    |                                                                                                                                                                                                                                                                                                                                                                                                               |                                  |
| 14                                   | Key results              | 18 | Summarise key results with reference to study objectives                                                                                                                                                                                                                                                                                                                                                      | 11                               |
| 15<br>16<br>17                       | Limitations              | 19 | Discuss limitations of the study, taking into account sources of potential bias or imprecision. Discuss both direction and magnitude of any potential bias                                                                                                                                                                                                                                                    | 14                               |
| 18<br>19<br>20<br>21                 | Interpretation           | 20 | Give a cautious overall interpretation of results considering objectives, limitations, multiplicity of analyses, results from similar studies, and other relevant evidence                                                                                                                                                                                                                                    | 15                               |
| 22                                   | Generalisability         | 21 | Discuss the generalisability (external validity) of the study results                                                                                                                                                                                                                                                                                                                                         | 13-14                            |
| 23                                   | <b>Other information</b> |    |                                                                                                                                                                                                                                                                                                                                                                                                               |                                  |
| 24<br>25<br>26                       | Funding                  | 22 | Give the source of funding and the role of the funders for the present study and, if applicable, for the original study on which the present article is based                                                                                                                                                                                                                                                 | 15                               |

\*Give information separately for exposed and unexposed groups.

**Note:** An Explanation and Elaboration article discusses each checklist item and gives methodological background and published examples of transparent reporting. The STROBE checklist is best used in conjunction with this article (freely available on the Web sites of PLoS Medicine at <http://www.plosmedicine.org/>, Annals of Internal Medicine at <http://www.annals.org/>, and Epidemiology at <http://www.epidem.com/>). Information on the STROBE Initiative is available at <http://www.strobe-statement.org>.

# BMJ Open

## Prevalence and impact of chronic dysglycemia among patients with Covid-19 in Swedish intensive care units: a multicenter, retrospective cohort study

|                                 |                                                                                                                                                                                                                                                                                                                                                                                                                                                                                                                                                                                                                                                                                                                                                                                                       |
|---------------------------------|-------------------------------------------------------------------------------------------------------------------------------------------------------------------------------------------------------------------------------------------------------------------------------------------------------------------------------------------------------------------------------------------------------------------------------------------------------------------------------------------------------------------------------------------------------------------------------------------------------------------------------------------------------------------------------------------------------------------------------------------------------------------------------------------------------|
| Journal:                        | <i>BMJ Open</i>                                                                                                                                                                                                                                                                                                                                                                                                                                                                                                                                                                                                                                                                                                                                                                                       |
| Manuscript ID                   | bmjopen-2022-071330.R1                                                                                                                                                                                                                                                                                                                                                                                                                                                                                                                                                                                                                                                                                                                                                                                |
| Article Type:                   | Original research                                                                                                                                                                                                                                                                                                                                                                                                                                                                                                                                                                                                                                                                                                                                                                                     |
| Date Submitted by the Author:   | 09-May-2023                                                                                                                                                                                                                                                                                                                                                                                                                                                                                                                                                                                                                                                                                                                                                                                           |
| Complete List of Authors:       | Balintescu, Anca; Karolinska Institute, Department of Clinical Science and Education, Södersjukhuset<br>Rysz, Susanne; Karolinska Institute, Department of Perioperative Medicine and Intensive Care<br>Hertz, Carl; Stockholm South General Hospital Anaesthesia Department ICU<br>Grip, Jonathan; Karolinska Institute, Department of Perioperative Medicine and Intensive Care<br>Cronhjort, Maria; Karolinska Institute, Department of Clinical Science and Education Södersjukhuset<br>Oldner, Anders; Karolinska Institute, Department of Perioperative Medicine and Intensive Care<br>Svensen, Christer; Karolinska Institute, Department of Clinical Science and Education Södersjukhuset<br>Mårtensson, Johan; Karolinska Institute, Department of Perioperative Medicine and Intensive Care |
| <b>Primary Subject Heading</b>: | Intensive care                                                                                                                                                                                                                                                                                                                                                                                                                                                                                                                                                                                                                                                                                                                                                                                        |
| Secondary Subject Heading:      | Diabetes and endocrinology                                                                                                                                                                                                                                                                                                                                                                                                                                                                                                                                                                                                                                                                                                                                                                            |
| Keywords:                       | Adult intensive & critical care < INTENSIVE & CRITICAL CARE, COVID-19, DIABETES & ENDOCRINOLOGY, General diabetes < DIABETES & ENDOCRINOLOGY                                                                                                                                                                                                                                                                                                                                                                                                                                                                                                                                                                                                                                                          |
|                                 |                                                                                                                                                                                                                                                                                                                                                                                                                                                                                                                                                                                                                                                                                                                                                                                                       |

SCHOLARONE™  
Manuscripts



I, the Submitting Author has the right to grant and does grant on behalf of all authors of the Work (as defined in the below author licence), an exclusive licence and/or a non-exclusive licence for contributions from authors who are: i) UK Crown employees; ii) where BMJ has agreed a CC-BY licence shall apply, and/or iii) in accordance with the terms applicable for US Federal Government officers or employees acting as part of their official duties; on a worldwide, perpetual, irrevocable, royalty-free basis to BMJ Publishing Group Ltd ("BMJ") its licensees and where the relevant Journal is co-owned by BMJ to the co-owners of the Journal, to publish the Work in this journal and any other BMJ products and to exploit all rights, as set out in our [licence](#).

The Submitting Author accepts and understands that any supply made under these terms is made by BMJ to the Submitting Author unless you are acting as an employee on behalf of your employer or a postgraduate student of an affiliated institution which is paying any applicable article publishing charge ("APC") for Open Access articles. Where the Submitting Author wishes to make the Work available on an Open Access basis (and intends to pay the relevant APC), the terms of reuse of such Open Access shall be governed by a Creative Commons licence – details of these licences and which [Creative Commons](#) licence will apply to this Work are set out in our licence referred to above.

Other than as permitted in any relevant BMJ Author's Self Archiving Policies, I confirm this Work has not been accepted for publication elsewhere, is not being considered for publication elsewhere and does not duplicate material already published. I confirm all authors consent to publication of this Work and authorise the granting of this licence.



# Prevalence and impact of chronic dysglycemia among patients with Covid-19 in Swedish intensive care units: a multicenter, retrospective cohort study

Anca Balintescu, MD, PhD<sup>1, 2</sup>; Susanne Rysz, MD<sup>3, 4</sup>; Carl Hertz, MD<sup>2</sup>; Jonathan Grip, MD, PhD<sup>3, 5</sup>; Maria Cronhjort, MD, PhD<sup>1, 2</sup>; Anders Oldner MD, PhD<sup>3, 6</sup>; Christer Svensen MD, PhD<sup>1, 2</sup>; Johan Mårtensson, MD, PhD<sup>3, 6</sup>

<sup>1</sup> Department of Clinical Science and Education Karolinska Institute, Unit of Anesthesiology and Intensive Care, South General Hospital, Sjukhusbacken 10, 11883 Stockholm, Sweden

<sup>2</sup> Department of Anesthesia and Intensive Care, South General Hospital, Sjukhusbacken 10, 11883 Stockholm, Sweden

<sup>3</sup> Department of Perioperative Medicine and Intensive Care, Karolinska University Hospital, Norrbacka S2:05, SE-17176 Stockholm, Sweden

<sup>4</sup> Department of Medicine, Solna, Karolinska Institute, Stockholm, Sweden

<sup>5</sup> Department of Clinical Science, Intervention and Technology, Karolinska Institute, Stockholm, Sweden

<sup>6</sup> Department of Physiology and Pharmacology, Section of Anaesthesia and Intensive Care, Karolinska Institutet, Norrbacka S2:05, SE-17176 Stockholm, Sweden

## Corresponding Author:

Anca Balintescu, ANOPIVA, South General Hospital, Sjukhusbacken 10, 11883 Stockholm, Sweden. Phone: +46 (0)722 7023 83. Fax: +46 (0)8-616 22 08. Email: [anca.balintescu@ki.se](mailto:anca.balintescu@ki.se)

Keywords: HbA1c, ICU, Covid-19, prevalence, glycemic control, diabetes

## Abstract

**Objective:** Using glycated hemoglobin A1c (HbA1c) screening, we aimed to determine the prevalence of chronic dysglycemia among patients with Covid-19 admitted to the intensive care unit (ICU). Additionally, we aimed to explore the association between chronic dysglycemia and clinical outcomes related to ICU stay.

**Design:** Multicenter retrospective observational study

**Setting:** ICUs in three hospitals in Stockholm, Sweden

**Participants:** Covid-19 patients admitted to the ICU between 5 March and 13 August 2020 with available HbA1c at admission. Chronic dysglycemia was determined based on previous diabetes history and HbA1c.

**Primary and secondary outcomes:** Primary outcome was the actual prevalence of chronic dysglycemia (prediabetes, unknown diabetes, or known diabetes) among Covid-19 patients. Secondary outcome was the association of chronic dysglycemia with 90-day mortality, ICU length of stay, duration of invasive mechanical ventilation (IMV), and renal replacement therapy (RRT), accounting for treatment selection bias.

**Results:** A total of 308 patients with available admission HbA1c were included. Chronic dysglycemia prevalence assessment was restricted to 206 patients admitted ICUs in which HbA1c was measured on all admitted patients. Chronic dysglycemia was present in 82.0% (95% CI 76.1%-87.0%) of patients, with prediabetes present in 40.2% (95% CI 33.5%-47.3%), unknown diabetes in 20.9% (95% CI 15.5%-27.1%), well-controlled diabetes in 7.8% (95% CI 4.5%-12.3%), and uncontrolled diabetes in 13.1% (95% CI 8.8%-18.5%). All patients with available HbA1c were included for the analysis of the relationship between chronic dysglycemia and secondary outcomes.

1  
2  
3 We found no independent association between chronic dysglycemia and 90-day  
4 mortality, ICU length of stay, or duration of IMV. After excluding patients with specific  
5 treatment limitations, no association between chronic dysglycemia and RRT use was  
6 observed.  
7  
8  
9  
10

11  
12 **Conclusions:** In our cohort of critically ill Covid-19 patients, the prevalence of chronic  
13 dysglycemia was 82%. We found no robust associations between chronic dysglycemia  
14 and clinical outcomes when accounting for treatment limitations.  
15  
16  
17  
18  
19  
20  
21  
22  
23

### 24 **Strengths and limitations of this study**

- 25 • Presents prevalence of chronic dysglycemia in an ICU population with Covid-  
26 19 based on additional quantification of admission HbA1c
- 27  
28 • Actual prevalence of chronic dysglycemia calculation in all ICU admitted  
29 patients, reducing the risk of ascertainment bias
- 30  
31 • Treatment limitations were considered in the analysis of clinical outcomes,  
32 thereby reducing the risk of treatment selection bias.
- 33  
34 • We lack data on glycemetic control during ICU stay, that might have influenced  
35 clinical outcomes  
36  
37  
38  
39  
40  
41  
42  
43  
44  
45  
46  
47  
48  
49

### 50 **Background**

51 Diabetes has been identified as a frequent comorbidity in patients with Covid-19, with  
52 a prevalence ranging from 7.4% to 34.3% among those requiring hospitalization [1-  
53 3]. A meta-analysis published in April 2020 found diabetes to be the second most  
54 frequent comorbidity in patients with Covid-19 admitted to the intensive care unit  
55  
56  
57  
58  
59  
60

1  
2  
3 (ICU) [4]. Furthermore, Covid-19 patients with diabetes appear to have a significantly  
4  
5 higher risk of ICU admission and worse prognosis than Covid-19 patients without  
6  
7 diabetes [4-6]. Particularly, a glycated hemoglobin A1c (HbA1c) level above 7% (53  
8  
9 mmol/mol) was identified as risk factor for ICU admission [7].

10  
11  
12 Recent data also indicates that diabetes is associated with worse prognosis among  
13  
14 ICU patients with Covid-19 [8]. However, these studies did not include HbA1c  
15  
16 measurements to identify patients with prediabetes or previously undiagnosed  
17  
18 diabetes. This is an important limitation since both prediabetes and diabetes is  
19  
20 considerably under-diagnosed both in the community [9] and in the ICU [10].

21  
22 Additionally, a history of diabetes diagnosis and HbA1c at ICU admission, measured  
23  
24 in consecutively admitted patients, is important in determining the true prevalence of  
25  
26 chronic dysglycemia in the critically ill Covid-19 population. Finally, information about  
27  
28 limitations of life-sustaining treatment were not considered in previous outcome  
29  
30 analyses. This is unfortunate since the presence of such limitations may introduce  
31  
32 treatment selection bias.

33  
34  
35 We therefore conducted a multicenter observational study using quantification of  
36  
37 HbA1c and information about diabetes history to determine the actual prevalence of  
38  
39 chronic dysglycemia (prediabetes, unknown diabetes, or known diabetes) among  
40  
41 Covid-19 patients admitted to ICU. In addition, we aimed to explore the relationship  
42  
43 of chronic dysglycemia with 90-day mortality, ICU length of stay, duration of invasive  
44  
45 mechanical ventilation (IMV) and severe acute kidney injury requiring renal  
46  
47 replacement therapy (RRT) accounting for treatment selection bias. We hypothesised  
48  
49 that prevalence of chronic dysglycemia in Covid-19 patients admitted to the ICU  
50  
51 exceeds the prevalence of chronic dysglycemia in the non Covid-19 critically ill  
52  
53  
54  
55  
56  
57  
58  
59  
60

1  
2  
3 population. Moreover, we hypothesised that such chronic dysglycemia would be  
4  
5 associated with worse clinical outcomes during ICU stay in patients with Covid-19.  
6  
7  
8  
9

## 10 11 12 **Material and Methods**

13  
14 The study was approved by the Swedish Ethical Review Authority (approval number  
15  
16 2020-01302, amendment 2020-02890) with a waiver of informed consent. The study  
17  
18 was performed in accordance with the Helsinki Declaration and reported in  
19  
20 conformity with the STROBE statement [11]  
21  
22

23  
24 Patient and Public Involvement statement: The study is based on data that was  
25  
26 collected during the ongoing Covid-19 pandemic in a quality register. No intervention  
27  
28 was applied to the individual patient. The public and patients were not involved in the  
29  
30 design of the study. Results are to be disseminated to the public and scientific  
31  
32 community through publication in peer-reviewed journal with open access.  
33  
34  
35  
36

### 37 *Study design*

38  
39 We conducted a multicenter, retrospective observational study of adult ( $\geq 18$  years)  
40  
41 patients with a positive polymerase chain reaction (PCR) for severe acute respiratory  
42  
43 syndrome coronavirus 2 (SARS-CoV-2) admitted to ten ICUs in three hospitals in  
44  
45 Stockholm, Sweden between March 5<sup>th</sup> and August 13<sup>th</sup>, 2020 (first wave). We  
46  
47 excluded patients without HbA1c obtained on admission to the ICU, patients in the  
48  
49 third trimester of pregnancy and patients with a primary admission diagnosis other  
50  
51 than Covid-19. In patients with multiple ICU admissions, only the first admission was  
52  
53 considered. All included patients were assessed in the outcome analyses.  
54  
55  
56

57  
58 Assessment of chronic dysglycemia prevalence was restricted to a nested cohort of  
59  
60

1  
2  
3 patients from ICUs in which HbA1c measurement was included in the routine  
4  
5 laboratory panel performed on all consecutive admissions. In the prevalence  
6  
7 analysis, we therefore excluded patients with available HbA1c who were admitted to  
8  
9 ICUs in which HbA1c was measured only at the discretion of the treating clinicians.  
10  
11  
12  
13

#### 14 *Data collection*

15  
16 HbA1c was measured in whole blood at ICU admission using the VARIANT II  
17  
18 TURBO Hemoglobin Testing System analyzer (Bio-Rad Laboratories GmbH) and  
19  
20 was reported in mmol/mol (IFCC calibrated) and in %. HbA1c was measured as part  
21  
22 of routine care in three ICUs and at the discretion of the treating clinician in seven  
23  
24 ICUs. We collected information on demographics, comorbidity, chronic medication,  
25  
26 HbA1c value, mortality and decision regarding limitation of life-sustaining care from  
27  
28 the patients' medical records (Take Care [CompuGroup Medical, Koblenz,  
29  
30 Germany]). International Classification of Disease (ICD) 10 codes were used to  
31  
32 identify comorbidity and previous history of diabetes. Additionally, data regarding  
33  
34 known diabetes diagnosis was extracted manually from the patients' medical records.  
35  
36  
37  
38  
39 Data on body mass index (BMI), Simplified Acute Physiology Score (SAPS) 3, ICU  
40  
41 length of stay, duration of IMV and RRT were collected from the ICU electronic  
42  
43 patient data management system Clinisoft (GE, Barrington, IL).  
44  
45  
46  
47  
48

#### 49 *Prediabetes and Diabetes definitions*

50  
51 Prediabetes and diabetes were diagnosed based on two complementary methods;  
52  
53 level of HbA1c at admission and previous medical history of diabetes, and  
54  
55 categorized into five groups:  
56  
57

58 (1) no diabetes (HbA1c <42 mmol/mol [6.0%] and no history of diabetes)  
59  
60

1  
2  
3 (2) prediabetes (HbA1c 42-47 mmol/mol [6.0-6.4%] and no history of diabetes)

4  
5 (3) unknown diabetes (HbA1c  $\geq$ 48 mmol/mol [6.5 %] and no history of diabetes)

6  
7 (4) controlled diabetes (HbA1c  $<$ 52 mmol/mol [6.9 %] and previous history of  
8  
9 diabetes)

10  
11 (5) uncontrolled diabetes (HbA1c  $\geq$ 52 mmol/mol [6.9 %] and previous history of  
12  
13 diabetes).

14  
15 Cut off values for HbA1c according to the World Health Organization were used [12].

16  
17 Individuals in group (2), (3), (4) and (5) were considered to have chronic dysglycemia  
18  
19 compared to those in group (1) labeled “no chronic dysglycemia”.

## 20 21 22 23 24 25 26 *Outcomes*

27  
28 The primary outcome was the prevalence of chronic dysglycemia. Secondary  
29  
30 outcomes included 90-day mortality, ICU length of stay, duration of IMV, and RRT  
31  
32 use.

## 33 34 35 36 37 *Statistical Analysis*

38  
39 We analyzed data using STATA version 12.1 (Stata Corp., College Station, Texas).  
40  
41 Categorical data is presented as numbers and percentages and compared using the  
42  
43 Fisher's exact test. Continuous data is summarized as median with interquartile  
44  
45 range (IQR) and compared using the Mann-Whitney U test. The prevalence of  
46  
47 chronic dysglycemia (primary outcome) was presented as percentages with 95%  
48  
49 confidence intervals (CI). We displayed time to death within 90 days using Kaplan-  
50  
51 Meier curves. Survival curves were compared using a log-rank test. We used  
52  
53 multivariable Cox regression analysis to assess the association between chronic  
54  
55 dysglycemia and 90-day mortality. We used multivariable linear regression analysis  
56  
57  
58  
59  
60

1  
2  
3 to assess the association with ICU length of stay and duration of IMV. Both these  
4  
5 outcomes were found to be well approximated by log-normal distributions and were  
6  
7 therefore log-transformed before analysis with results presented as geometric means  
8  
9 (95% CI). We used multivariable logistic regression analysis to assess the  
10  
11 association with RRT use, before and after excluding patients with RRT as a  
12  
13 treatment limitation. All regression analyses were conducted using the following  
14  
15 models: adjusted for SAPS 3, age and sex, and adjusted for SAPS 3, age, sex,  
16  
17 hypertension, any malignancy, any treatment limitation on admission and chronic  
18  
19 corticosteroid use. A post-hoc exploratory comparison between subgroups was done  
20  
21 for 90 day mortality and RRT use. A two-sided P-value <0.05 was considered  
22  
23 statistically significant.  
24  
25  
26  
27  
28  
29

## 30 **Results**

### 31 *Patients*

32  
33 A total of 584 patients with positive SARS-CoV-2 test were admitted to the study  
34  
35 ICUs during the study period. We excluded 225 patients without available HbA1c, six  
36  
37 pregnant patients, 16 readmissions and 29 patients without symptoms associated  
38  
39 with Covid-19. Therefore, we included 308 patients with available HbA1c for outcome  
40  
41 analysis. Among those 308 patients, 206 consequently admitted patients in which  
42  
43 HbA1c was included in the admission routine laboratory panel were used for  
44  
45 prevalence calculation (Figure 1). Baseline characteristics and treatment limitations  
46  
47 of the entire study population are detailed in Table 1.  
48  
49  
50  
51  
52  
53  
54  
55  
56  
57  
58  
59  
60



**Table 1.** Baseline characteristics and treatment limitations

| Characteristic                                   | Chronic dysglycemia    |             |                  |                     |                       | P <sup>e</sup> |
|--------------------------------------------------|------------------------|-------------|------------------|---------------------|-----------------------|----------------|
|                                                  | No chronic dysglycemia | Prediabetes | Unknown diabetes | Controlled diabetes | Uncontrolled diabetes |                |
| No. (%)                                          | 61 (19.8)              | 114 (37.0)  | 60 (19.4)        | 25 (8.11)           | 48 (15.5)             |                |
| Age, years                                       | 57 (51,63)             | 61 (53, 68) | 60 (52, 68)      | 63 (57, 71)         | 62 (55,69)            | 0.03           |
| Male sex                                         | 48 (78.6)              | 92 (80.7)   | 47 (78.3)        | 21 (84.0)           | 36 (75.0)             | 1.00           |
| Body mass index <sup>a</sup> , kg/m <sup>2</sup> | 27 (25, 32)            | 27 (25, 30) | 28 (25, 31)      | 29 (26, 32)         | 30 (26, 33)           | 0.97           |
| HbA1c, mmol/mol                                  | 39 (36, 40)            | 44 (43, 46) | 51 (49, 57)      | 47 (44, 49)         | 70 (61, 81)           | <0.001         |
| Diabetes treatment                               |                        |             |                  |                     |                       |                |
| Diet only                                        |                        |             |                  | 6 (24.0)            | 2 (4.1)               |                |
| OAD only                                         |                        |             |                  | 17 (68)             | 19 (39.5)             |                |
| Insulin only                                     |                        |             |                  | 1 (4.0)             | 12 (25.0)             |                |
| OAD+Insulin                                      |                        |             |                  | 1 (4.0)             | 15 (31.2)             |                |
| Comorbidity                                      |                        |             |                  |                     |                       |                |
| Hypertension                                     | 18 (29.5)              | 40 (35.0)   | 23 (38.3)        | 16 (64.0)           | 34 (70.8)             | 0.02           |
| Heart failure                                    | 6 (9.8)                | 5 (4.3)     | 6 (10.0)         | 0 (0.0)             | 3 (6.2)               | 0.24           |
| Previous myocardial infarction                   | 2 (3.2)                | 4 (3.5)     | 6 (10.0)         | 0 (0.0)             | 7 (14.5)              | 0.38           |
| Chronic kidney disease                           | 4 (6.5)                | 13 (11.4)   | 7 (11.6)         | 6 (24.0)            | 11 (22.9)             | 0.09           |
| Liver disease                                    | 2 (3.2)                | 4 (3.5)     | 1 (1.6)          | 1 (4.0)             | 1 (2.0)               | 1.00           |
| Any malignancy                                   | 0 (0.0)                | 8 (7.0)     | 2 (3.3)          | 2 (8.0)             | 4 (8.3)               | 0.04           |
| Asthma/COPD                                      | 13 (21.3)              | 20 (17.5)   | 14 (23.3)        | 5 (20.0)            | 9 (18.7)              | 0.72           |
| SAPS 3 <sup>b</sup>                              | 53 (48, 60)            | 55 (49, 60) | 57 (52, 62)      | 59 (52, 63)         | 56 (52, 69)           | 0.18           |
| Chronic drug use                                 |                        |             |                  |                     |                       |                |
| Corticosteroids <sup>c</sup>                     | 5 (8.20)               | 16 (14.04)  | 8 (13.3)         | 4 (16.0)            | 6 (12.5)              | 0.24           |
| Immunosuppressive therapy <sup>d</sup>           | 1 (1.6)                | 8 (7.0)     | 3 (5.0)          | 1 (4.0)             | 1(2.0)                | 0.31           |
| Treatment limitations <sup>f</sup>               |                        |             |                  |                     |                       |                |
| Any limitation                                   | 14 (22.9)              | 19 (16.6)   | 13 (21.6)        | 8 (32.0)            | 13 (27.0)             | 0.86           |
| No RRT                                           | 5 (8.2)                | 7 (6.1)     | 5 (8.3)          | 5 (20.0)            | 6 (12.5)              | 1.00           |
| No IMV                                           | 6 (9.8)                | 10 (8.7)    | 4 (6.6)          | 4 (16.0)            | 6 (12.5)              | 1.00           |
| No CPR                                           | 9 (14.7)               | 19 (16.6)   | 12 (20.0)        | 8 (32.0)            | 12 (25.0)             | 0.36           |
| No ECMO                                          | 7 (11.4)               | 3 (2.6)     | 5 (8.3)          | 3 (12.0)            | 3 (6.2)               | 0.15           |
| Palliative care <sup>g</sup>                     | 1 (1.6)                | 18 (16.5)   | 7 (12.2)         | 4 (16.6)            | 5 (10.8)              | 0.006          |

Data are n (%) or median (interquartile range)

HbA1c, glycated hemoglobin A1c; OAD, oral hypoglycemic agent; COPD, Chronic obstructive pulmonary disease; SAPS, Simplified Acute Physiology Score, 2 missing values (306 patients with data); RRT, renal replacement therapy; IMV, invasive mechanical ventilation; CPR, cardiopulmonary resuscitation

<sup>a</sup>Missing data in 15 patients (293 patients with data)

<sup>b</sup>Missing data in 2 patients (306 patients with data)

<sup>c</sup>Systemic or inhaled corticosteroids

<sup>d</sup>Immunosuppressive therapy was defined as: treatment with Metotrexate, Azathioprine, Cyclosporin, Tacrolimus, Infliximab

<sup>e</sup>P values for the comparison between no chronic dysglycemia and chronic dysglycemia, Mann-Whitney U test was used for comparison of continuous data and Fischer's exact test for comparison of categorical data

<sup>f</sup>Decision taken any time during ICU stay

<sup>g</sup>Decision to go over to palliative care taken during ICU stay

Patients with chronic dysglycemia were older, were more likely to have hypertension, malignancy and/or chronic kidney disease, and had higher SAPS 3 than patients without chronic dysglycemia. Overall, 14 (22.9%) patients in the no chronic dysglycemia group and 53 (21.5%) patients in the chronic dysglycemia group

1  
2  
3 received one or more limitations of life-supporting therapies during their ICU stay.  
4  
5 “No Cardiopulmonary resuscitation (CPR)” was the most common treatment  
6  
7 limitation. We observed the highest proportion of limitations among patients with  
8  
9 known (controlled or uncontrolled) diabetes. Decision to switch to palliative care was  
10  
11 made in 1 (1.6%) patient in the no chronic dysglycemia group and 34 (13.8%)  
12  
13 patients in the chronic dysglycemia group (P=0.006). Cumulative percentage of  
14  
15 treatment limitations relative ICU admission is displayed in Figures S1-S4.  
16  
17  
18  
19  
20

### 21 *Primary outcome*

22  
23 In the nested cohort of 206 consecutive patients with available HbA1c, 169 (82.0%;  
24  
25 95% CI 76.1%-87.0%) were diagnosed with chronic dysglycemia. Prediabetes was  
26  
27 present in 83 (40.2%, 95% CI 33.5%-47.3%), unknown diabetes in 43 (20.9%, 95%  
28  
29 CI 15.5%-27.1%), well-controlled diabetes in 16 (7.8%, 95% CI 4.5%-12.3%), and  
30  
31 uncontrolled diabetes in 27 (13.1%, 95% CI 8.8%-18.5%) patients (Figure 2).  
32  
33  
34  
35  
36  
37

### 38 *Secondary outcomes*

39  
40 Nine (14.7%) patients in the no chronic dysglycemia group and 62 (25.1%) patients  
41  
42 in the chronic dysglycemia group died within 90 days (P=0.09) (Table 2, Figure 3 and  
43  
44 Figure S5). ICU length of stay and duration of IMV were similar in the two groups.  
45  
46 IMV was delivered to 42 (68.8%) patients without chronic dysglycemia and to 187  
47  
48 (75.7%) patients with chronic dysglycemia (P=0.32). RRT was delivered to 17  
49  
50 (27.9%) no chronic dysglycemia patients and 42 (17.0%) chronic dysglycemia  
51  
52 patients (P=0.06) (Table 2 and Table 3).  
53  
54  
55  
56  
57  
58  
59  
60

**Table 2.** Secondary outcomes

| Outcomes                              | Chronic dysglycemia             |                       |                           |                              |                                | P <sup>a</sup> |
|---------------------------------------|---------------------------------|-----------------------|---------------------------|------------------------------|--------------------------------|----------------|
|                                       | No chronic dysglycemia (n = 61) | Prediabetes (n = 114) | Unknown diabetes (n = 60) | Controlled diabetes (n = 25) | Uncontrolled diabetes (n = 48) |                |
| 90-day mortality, n (%)               | 9 (14.7)                        | 28 (24.5)             | 12 (20.0)                 | 7 (28.0)                     | 15 (31.2)                      | 0.09           |
| ICU length of stay, days              | 9 (4, 25)                       | 14 (6, 24)            | 13 (6, 28)                | 8 (5, 21)                    | 11 (7, 22)                     | 0.69           |
| Invasive mechanical ventilation, days | 16 (8, 29)                      | 14 (10, 23)           | 15 (10, 27)               | 15 (6, 21)                   | 14 (9, 22)                     | 0.60           |
| Renal replacement therapy, n (%)      | 17 (27.9)                       | 22 (19.3)             | 11 (18.3)                 | 1 (4.0)                      | 8 (16.6)                       | 0.06           |

Data are n (%) or median (interquartile range)

ICU lengths of stay (4 missing values because of transfer to other hospital)

<sup>a</sup>P values for the comparison between no chronic dysglycemia and chronic dysglycemia, Mann-Whitney U test was used for comparison of continuous data and Fischer's exact test for comparison of categorical data.

**Table 3.** Multivariable regression analyses showing the association of chronic dysglycemia (versus no chronic dysglycemia) with secondary outcomes

| Outcome measure                                       | No Chronic Dysglycemia | Chronic Dysglycemia | Adjusted Risk Estimate (95% CI) <sup>a</sup> | P <sup>a</sup> | Adjusted Risk Estimate (95% CI) <sup>b</sup> | P <sup>b</sup> | Statistical test    |
|-------------------------------------------------------|------------------------|---------------------|----------------------------------------------|----------------|----------------------------------------------|----------------|---------------------|
| <b>90-day mortality n (%)</b>                         | 9/61 (14.7)            | 62/247 (25.1)       | 1.61 (0.79 to 3.26)                          | 0.18           | 1.54 (0.74 to 3.19)                          | 0.24           | Cox regression      |
| <b>ICU length of stay, days</b>                       |                        |                     |                                              |                |                                              |                |                     |
| All patients                                          | 9 (4, 25)              | 13 (6, 23)          | 1.06 (0.78 to 1.43)                          | 0.70           | 1.05 (0.77 to 1.44)                          | 0.71           | Linear regression   |
| ICU survivors <sup>c</sup>                            | 9 (5, 27)              | 14 (7, 24)          | 1.04 (0.76 to 1.43)                          | 0.75           | 1.05 (0.76 to 1.44)                          | 0.75           | Linear regression   |
| <b>Invasive mechanical ventilation duration, days</b> |                        |                     |                                              |                |                                              |                |                     |
| All patients <sup>d</sup>                             | 16 (8, 29)             | 14 (10, 23)         | 0.92 (0.68 to 1.23)                          | 0.58           | 0.93 (0.69 to 1.24)                          | 0.63           | Linear regression   |
| ICU survivors <sup>e</sup>                            | 16 (8, 30)             | 15 (10, 23)         | 0.93 (0.70 to 1.23)                          | 0.61           | 0.92 (0.70 to 1.22)                          | 0.59           | Linear regression   |
| <b>Renal replacement therapy, n (%)</b>               |                        |                     |                                              |                |                                              |                |                     |
| All patients                                          | 17/61 (27.9)           | 42/247 (17.0)       | 0.52 (0.26 to 1.02)                          | 0.06           | 0.49 (0.24 to 0.99)                          | 0.04           | Logistic regression |
| Patients without treatment limitation as no RRT       | 17/57 (29.8)           | 42/224 (18.8)       | 0.52 (0.26 to 1.04)                          | 0.10           | 0.52 (0.25 to 1.07)                          | 0.08           | Logistic regression |

<sup>a</sup>Multivariable models were adjusted for Simplified Acute Physiology Score (SAPS) 3, age and sex.

<sup>b</sup>Multivariable models were adjusted for Simplified Acute Physiology Score (SAPS) 3, age, sex, hypertension, any malignancy, any treatment limitation on admission and chronic corticosteroid use

<sup>c</sup>ICU length of stay in ICU survivors, 260 observations

<sup>d</sup>Invasive mechanical ventilation duration, 227 observations

<sup>e</sup>Invasive mechanical ventilation duration in ICU survivors, 189 observations

1  
2  
3  
4  
5 On multivariable regression analysis we observed a numerically higher mortality  
6 (adjusted HR 1.54, 95% CI 0.74-3.19, P=0.24) and significantly lower RRT use  
7 (adjusted OR 0.49, 95% CI 0.24-0.99, P=0.04) in patients with chronic dysglycemia  
8 (Table 3). No association with RRT was observed after exclusion of patients with “No  
9 RRT” as treatment limitation. In the post-hoc exploratory comparison between  
10 subgroups, RRT use was higher in the no diabetes group compared to the controlled  
11 diabetes group, as well as in the uncontrolled diabetes compared to controlled  
12 diabetes group (Table S1). Individuals with uncontrolled diabetes had the lowest  
13 probability of survival followed by individuals with controlled diabetes and  
14 prediabetes. The highest probability of survival was observed among patients with no  
15 chronic dysglycemia and prediabetes, respectively (Figure S5). However, we  
16 observed no statistically significant differences in mortality in the post-hoc  
17 comparison of subgroups (Table S1).  
18  
19  
20  
21  
22  
23  
24  
25  
26  
27  
28  
29  
30  
31  
32  
33  
34  
35  
36  
37  
38  
39

## 40 **Discussions**

### 41 *Key findings*

42 We performed a multicenter observational investigation to determine the prevalence  
43 of chronic dysglycemia and its impact on clinical outcomes among Covid-19 patients  
44 admitted to ICU. Using available information about the patients’ diabetic status in  
45 combination with routine HbA1c assessment, we found that 82% had chronic  
46 dysglycemia with two thirds having either prediabetes or undiagnosed diabetes. We  
47 observed numerically higher 90-day mortality in patients with chronic dysglycemia,  
48 with the highest mortality (31%) observed among those with uncontrolled diabetes.  
49  
50  
51  
52  
53  
54  
55  
56  
57  
58  
59  
60

1  
2  
3 Conversely, the proportion of patients receiving RRT was lower among patients with  
4 chronic dysglycemia even when patients without “No RRT” as treatment limitation  
5 were considered separately. We found no association of chronic dysglycemia with  
6 ICU length of stay or duration of IMV.  
7  
8  
9  
10  
11  
12  
13

#### 14 *Relationship with previous studies*

15  
16 A global meta-analysis of more than 16000 ICU patients with Covid-19 suggests a  
17 pooled prevalence of known diabetes between 23-31% [13], close to the observed  
18 prevalence in our study (21%). However, few studies have used additional HbA1c  
19 measurements to assess the actual prevalence of chronic dysglycemia, including  
20 prediabetes and undiagnosed diabetes. One such ICU study from Austria found a  
21 prevalence of chronic dysglycemia of 85%, which is in close agreement with our  
22 findings [14]. However, the Austrian study did not assess consecutive patients and  
23 may therefore be prone to selection bias.  
24  
25  
26  
27  
28  
29  
30  
31  
32  
33  
34

35 Our findings indicate that chronic dysglycemia is more common in Covid-19 patients  
36 than in ICU patients with other admission diagnoses. In fact, in a pre-Covid-19 cohort  
37 of general ICU patients we found a corresponding dysglycemia prevalence of 33%  
38 [10]. The relationship between severe SARS-CoV-2 infection and dysglycemia has  
39 different potential explanations. SARS-CoV-2 enters cells in various organs, including  
40 the pancreas, via angiotensin-converting enzyme II (ACE2). As ACE2 is involved in  
41 regulating pancreatic beta-cell function, a link between SARS-CoV-2 infection and  
42 beta-cell dysfunction and diabetes development has been suggested [15].  
43  
44  
45  
46  
47  
48  
49  
50  
51  
52

53 Interestingly, the prevalence of elevated HbA1c below the diabetes diagnostic  
54 threshold (prediabetes) was markedly higher in our Covid-19 cohort than in our  
55 previous pre-Covid-19 cohort (40% vs 9%). It is possible that the duration of Covid-  
56  
57  
58  
59  
60

1  
2  
3 19 symptoms before ICU admission (typically ten days in the literature [16]) was  
4  
5 sufficient to trigger new onset hyperglycemia with mildly elevated HbA1c.  
6

7  
8 In addition to the above speculations about SARS-CoV-2 as a *cause* of dysglycemia,  
9  
10 there is also evidence suggesting that patients with preexisting dysglycemia are  
11  
12 prone to a more severe course of Covid-19. For example, some studies have shown  
13  
14 that hospitalized SARS-CoV-2 positive with prediabetes, unknown diabetes, and  
15  
16 known poorly controlled diabetes are at increased risk of SARS-CoV-2 associated  
17  
18 respiratory failure requiring intensive care [17]. A higher burden of comorbidities,  
19  
20 hyperglycemia *per se*, and chronic low-grade inflammation in diabetes may explain  
21  
22 this observation [18].  
23  
24

25  
26 Wang et al identifies fasting glucose as an independent predictor for 28-day mortality  
27  
28 in hospitalized individuals with Covid-19 and previously unknown diabetes. However,  
29  
30 HbA1c was not assessed and interference from stress hyperglycemia might have led  
31  
32 to the different results compared to our study [19].  
33  
34

35  
36 Others [20], identified an increased risk of death in individuals with diabetes and  
37  
38 increasing levels of HbA1c above 48 mmol/mol and known diabetes in a large cohort  
39  
40 of hospitalized patients, but not in critically ill individuals.  
41

42  
43 Whether chronic dysglycemia is associated with worse outcomes among Covid-19  
44  
45 patients admitted to ICU remains uncertain. Dennis et al [21] found increased  
46  
47 mortality risk at 30 days (HR 1.23 [95% CI 1.14, 1.32]) compared to patients with no  
48  
49 diabetes in patients admitted to the high Dependency Unit or ICU, but did not take  
50  
51 HbA1c into consideration. A multicenter study from France including 410 ICU  
52  
53 patients with Covid-19, found no association between the severity of dysglycemia  
54  
55 and tracheal intubation and/or death within 7 days of admission in patients with  
56  
57 diabetes than in those without diabetes [22]. This is in accordance with the findings of  
58  
59  
60

1  
2  
3 our study. In contrast, others found higher mortality in the subgroup of mechanically  
4 ventilated patients with diabetes [14].  
5  
6

7 We previously demonstrated an independent association between chronic  
8 dysglycemia and need for RRT in critically ill non-Covid-19 patients [10]. This  
9 association was, however, not found in the present study. In fact, we observed a  
10 higher proportion of patients requiring RRT among our patients without chronic  
11 dysglycemia and an inverse association between chronic dysglycemia and RRT use.  
12  
13 Only one individual in the controlled diabetes subgroup received RRT during ICU  
14 stay. We believe this surprising finding may be due to treatment limitations. In fact,  
15 after exclusion of patients with treatment limitation “not for RRT”, we observed no  
16 statistically significant association between chronic dysglycemia and RRT use.  
17  
18 Limitations in life-sustaining care were more common in the known diabetes groups  
19 (well controlled and uncontrolled diabetes) than in all other groups. We cannot  
20 exclude the possibility that patients with severe acute or chronic kidney injury did not  
21 reach the ICU because of treatment limitation decisions made at hospital arrival or on  
22 the medical ward. This might have influenced the number of patients with kidney  
23 injury reaching the ICU, affecting predominantly patients with chronic dysglycemia,  
24 as they are usually older and have multiple comorbidities.  
25  
26  
27  
28  
29  
30  
31  
32  
33  
34  
35  
36  
37  
38  
39  
40  
41  
42  
43  
44  
45  
46

#### 47 *Strengths and limitations*

48  
49 Our study has several strengths. It is the first to assess the prevalence of chronic  
50 dysglycemia in an ICU population with Covid-19 based on additional quantification of  
51 admission HbA1c. This approach reduced bias due to events that would have  
52 influenced HbA1c values obtained before ICU admission. We restricted the  
53 prevalence assessment to a cohort of patients who were admitted to ICUs where  
54  
55  
56  
57  
58  
59  
60

1  
2  
3 HbA1c was part of the routine laboratory panel, thereby reducing the risk of  
4  
5 ascertainment bias. Additionally, by measuring HbA1c in all patients admitted to the  
6  
7 ICU we identified 169 (82%) individuals with chronic dysglycemia and 86 (41.7%)  
8  
9 with diabetes. If HbA1c would not have been measured routinely at ICU admission,  
10  
11 we would only have identified 43 (20.9%) individuals with diabetes. Furthermore, we  
12  
13 considered treatment limitations in our analysis of clinical outcomes, thereby  
14  
15 reducing the risk of treatment selection bias. Finally, we included patients admitted to  
16  
17 ten ICUs in three University hospitals, thus providing a degree of external validity for  
18  
19 applying our findings to similar settings.  
20  
21  
22

23  
24 Our study has limitations. We lack data on conditions and treatment that might have  
25  
26 influenced admission HbA1c, such as haemoglobinopathies and blood transfusion  
27  
28 before ICU admission. Since interviews with patients or relatives were not performed,  
29  
30 a degree of misclassification due to non-documented dysglycemia diagnoses cannot  
31  
32 be ruled out. However, such interviews would have been logistically difficult during  
33  
34 the ongoing pandemic. We used an HbA1c cutoff of 42-47 mmol/mol (6.0-6.4%) to  
35  
36 classify prediabetes. If we instead had used the cutoff suggested by the American  
37  
38 Diabetes Association (39-47 mmol/mol [5.7-6.4%]), our prevalence of chronic  
39  
40 dysglycemia would have increased from 82.0% to 91.3%. This approach did not,  
41  
42 however, alter the association with the secondary outcomes (data not shown). In  
43  
44 addition, we lack information about glycemic control during intensive care, which  
45  
46 might have modified clinical outcomes.  
47  
48  
49

50  
51 The observational nature of the study does not imply causation. Generalizability of  
52  
53 our results is limited to populations with similar health care systems and similar legal  
54  
55 frame-works for decisions on treatment limitations. Finally, the limited sample size  
56  
57  
58  
59  
60



1  
2  
3 may limit the conclusion regarding secondary outcomes that can be drawn from the  
4  
5 data.  
6  
7  
8  
9

## 10 **Conclusion**

11  
12 In our multicenter cohort of Covid-19 patients admitted to the ICU, HbA1c screening  
13  
14 diagnosed chronic dysglycemia in four out of five patients with the majority having  
15  
16 either prediabetes or previously undiagnosed diabetes. Chronic dysglycemia was not  
17  
18 significantly associated with mortality, ICU length of stay, duration of invasive  
19  
20 mechanical ventilation or renal replacement therapy use after considering treatment  
21  
22 limitations. These findings indicate that chronic dysglycemia may be a risk factor for  
23  
24 severe Covid-19. However, Covid-19 prognosis in the ICU does not appear to be  
25  
26 modified by chronic dysglycemia.  
27  
28  
29  
30  
31  
32  
33  
34

## 35 **Author Contributions:**

36  
37 AB, SR, MC, JG, AO, CS and JM contributed to the concept and design of the study.  
38  
39

40  
41 AB, SR, CH and JM collected data.  
42

43  
44 AB, SR, CH, JG, MC, CS, AO and JM contributed to the analysis and interpretation of  
45  
46 data.  
47

48  
49 AB and JM drafted the manuscript.  
50

51  
52 All authors critically reviewed and approved the final manuscript.  
53

54  
55 AB accepts full responsibility for the work and the conduct of the study, had access to  
56  
57 the data, and controlled the decision to publish.  
58  
59  
60

**Funding** AB and JM were supported by Region Stockholm (clinical research appointment and ALF project grants), grant number 580282.

A non-peer-reviewed version of this article has been a part of a publicly defended PhD thesis ISBN 978-91-8016-719-2 and was submitted to Karolinska Institute Open Archive, available at <https://openarchive.ki.se/xmlui/handle/10616/48203> on 19 September 2022.

**Competing interest:** The authors have no competing interest relevant to this work.

**Data availability:** The data that support the findings of this study are available from the corresponding author upon reasonable request.

**Ethics Approval Statement:** The study was approved by the Swedish Ethical Review Authority (approval number 2020-01302).

## References

- [1] Yang J, Zheng Y, Gou X, Pu K, Chen Z, Guo Q, et al. Prevalence of comorbidities and its effects in patients infected with SARS-CoV-2: a systematic review and meta-analysis. *International Journal of Infectious Diseases* 2020;94:91-5. doi:10.1016/j.ijid.2020.03.017
- [2] Liu Y, Lu R, Wang J, Cheng Q, Zhang R, Zhang S, et al. Diabetes, even newly defined by HbA1c testing, is associated with an increased risk of in-hospital death in adults with COVID-19. *BMC Endocrine Disorders* 2021;21(1):1-10. doi:10.1186/s12902-021-00717-6
- [3] Guan W-j, Liang W-h, Zhao Y, Liang H-r, Chen Z-s, Li Y-m, et al. Comorbidity and its impact on 1590 patients with COVID-19 in China: a nationwide analysis. *European Respiratory Journal* 2020;55(5):2000547. doi:10.1183/13993003.00547-2020
- [4] Roncon L, Zuin M, Rigatelli G, Zuliani G. Diabetic patients with COVID-19 infection are at higher risk of ICU admission and poor short-term outcome. *J Clin Virol* 2020;127:104354. doi:10.1016/j.jcv.2020.104354
- [5] Zhou F, Yu T, Du R, Fan G, Liu Y, Liu Z, et al. Clinical course and risk factors for mortality of adult inpatients with COVID-19 in Wuhan, China: a retrospective cohort study. *The Lancet* 2020;395. doi:10.1016/S0140-6736(20)30566-3
- [6] Guo W, Li M, Dong Y, Zhou H, Zhang Z, Tian C, et al. Diabetes is a risk factor for the progression and prognosis of COVID-19. *Diabetes/metabolism research and reviews* 2020:e3319.

- 1  
2  
3 [7] Lei M, Lin K, Pi Y, Huang X, Fan L, Huang J, et al. Clinical Features and Risk  
4 Factors of ICU Admission for COVID-19 Patients with Diabetes. *Journal of Diabetes*  
5 *Research* 2020;2020:5237840. doi:10.1155/2020/5237840  
6  
7 [8] Grasselli G, Greco M, Zanella A, Albano G, Antonelli M, Bellani G, et al. Risk  
8 Factors Associated With Mortality Among Patients With COVID-19 in Intensive Care  
9 Units in Lombardy, Italy. *JAMA internal medicine* 2020;180(10):1345-55.  
10 doi:10.1001/jamainternmed.2020.3539  
11 [9] Beagley J, Guariguata L, Weil C, Motala AA. Global estimates of undiagnosed  
12 diabetes in adults. *Diabetes Research and Clinical Practice* 2014;103(2):150-60.  
13 doi:https://doi.org/10.1016/j.diabres.2013.11.001  
14 [10] Balintescu A, Palmgren I, Lipcsey M, Oldner A, Larsson A, Cronhjort M, et al.  
15 Prevalence and impact of chronic dysglycemia in intensive care unit patients-A  
16 retrospective cohort study. *Acta Anaesthesiol Scand* 2021;65(1):82-91.  
17 doi:10.1111/aas.13695  
18 [11] Erik von Elm DGA, Matthias Egger, Stuart J. Pocock, Peter C. Gøtzsche, and Jan P.  
19 Vandembroucke. The Strengthening the Reporting of Observational Studies in  
20 Epidemiology (STROBE) Statement: Guidelines for Reporting Observational Studies.  
21 *Annals of Internal Medicine* 2007;147(8):573-7. doi:10.7326/0003-4819-147-8-  
22 200710160-00010 %m 17938396  
23 [12] Organisation WH. World Health Organisation. Use of Glycated Haemoglobin  
24 (HbA1c) in the Diagnosis of Diabetes Mellitus,  
25 [https://www.who.int/publications/i/item/use-of-glycated-haemoglobin-\(-hba1c\)-in-](https://www.who.int/publications/i/item/use-of-glycated-haemoglobin-(-hba1c)-in-diagnosis-of-diabetes-mellitus)  
26 [diagnosis-of-diabetes-mellitus](https://www.who.int/publications/i/item/use-of-glycated-haemoglobin-(-hba1c)-in-diagnosis-of-diabetes-mellitus); [accessed 07 Fenruary 2022].  
27  
28 [13] Tan E, Song J, Deane AM, Plummer MP. Global Impact of Coronavirus Disease 2019  
29 Infection Requiring Admission to the ICU: A Systematic Review and Meta-analysis.  
30 *Chest* 2021;159(2):524-36. doi:https://doi.org/10.1016/j.chest.2020.10.014  
31  
32 [14] Klein SJ, Mayerhöfer T, Fries D, Preuß Hernández C, Joannidis M, Collaborators, et  
33 al. Elevated HbA1c remains a predominant finding in severe COVID-19 and may be  
34 associated with increased mortality in patients requiring mechanical ventilation.  
35 *Critical Care* 2021;25(1):1-4. doi:10.1186/s13054-021-03730-2  
36  
37 [15] Memon B, Abdelalim EM. ACE2 function in the pancreatic islet: Implications for  
38 relationship between SARS-CoV-2 and diabetes. *Acta Physiologica* 2021;233(4):1-13.  
39 doi:10.1111/apha.13733  
40  
41 [16] Larsson E, Brattstrom O, Agvald-Ohman C, Grip J, Jalde FC, Stralin K, et al.  
42 Characteristics and outcomes of patients with COVID-19 admitted to ICU in a tertiary  
43 hospital in Stockholm, Sweden. *Acta anaesthesiologica Scandinavica* 2021;65(1):76-  
44 81. doi:10.1111/aas.13694  
45  
46 [17] Rysz S, Jonsson Fagerlund M, Rimes-Stigare C, Larsson E, Campoccia Jalde F,  
47 Mårtensson J. Chronic dysglycemia and risk of SARS-CoV-2 associated respiratory  
48 failure in hospitalized patients. *Acta anaesthesiologica Scandinavica* 2022;66(1):48-  
49 55. doi:10.1136/bjsports-2021-104080.  
50  
51 [18] Landstra CP, de Koning EJP. COVID-19 and Diabetes: Understanding the  
52 Interrelationship and Risks for a Severe Course. *Frontiers in endocrinology*  
53 2021;12:649525. doi:10.3389/fendo.2021.649525  
54  
55 [19] Wang S, Ma P, Zhang S, Song S, Wang Z, Ma Y, et al. Fasting blood glucose at  
56 admission is an independent predictor for 28-day mortality in patients with COVID-19  
57 without previous diagnosis of diabetes: a multi-centre retrospective study.  
58 *Diabetologia* 2020;63(10):2102-11. doi:10.1007/s00125-020-05209-1  
59  
60 [20] Holman N, Knighton P, Kar P, O'Keefe J, Curley M, Weaver A, et al. Risk factors for  
COVID-19-related mortality in people with type 1 and type 2 diabetes in England: a

- 1  
2  
3 population-based cohort study. *The lancet Diabetes & endocrinology* 2020;8(10):823-  
4 33. doi:10.1016/S2213-8587(20)30271-0  
5 [21] Dennis JM, Mateen BA, Sonabend R, Thomas NJ, Patel KA, Hattersley AT, et al.  
6 Type 2 Diabetes and COVID-19-Related Mortality in the Critical Care Setting: A  
7 National Cohort Study in England, March-July 2020. *Diabetes Care* 2021;44(1):50-7.  
8 doi:10.2337/dc20-1444  
9 [22] Cariou B, Hadjadj S, Wargny M, Pichelin M, Al-Salameh A, Allix I, et al. Phenotypic  
10 characteristics and prognosis of inpatients with COVID-19 and diabetes: the  
11 CORONADO study. *Diabetologia* 2020;63(8):1500-15. doi:10.1007/s00125-020-  
12 05180-x  
13  
14  
15

## 16 Figure legends

17 **Figure 1.** Flow chart of study population

18 **Figure 2.** Prevalence of prediabetes, unknown diabetes and known diabetes among 206  
19 consecutive ICU patients with Covid-19

20 **Figure 3.** Probability of survival in no chronic dysglycemia patients and in patients with  
21 chronic dysglycemia  
22  
23  
24  
25  
26  
27  
28  
29  
30  
31  
32  
33  
34  
35  
36  
37  
38  
39  
40  
41  
42  
43  
44  
45  
46  
47  
48  
49  
50  
51  
52  
53  
54  
55  
56  
57  
58  
59  
60

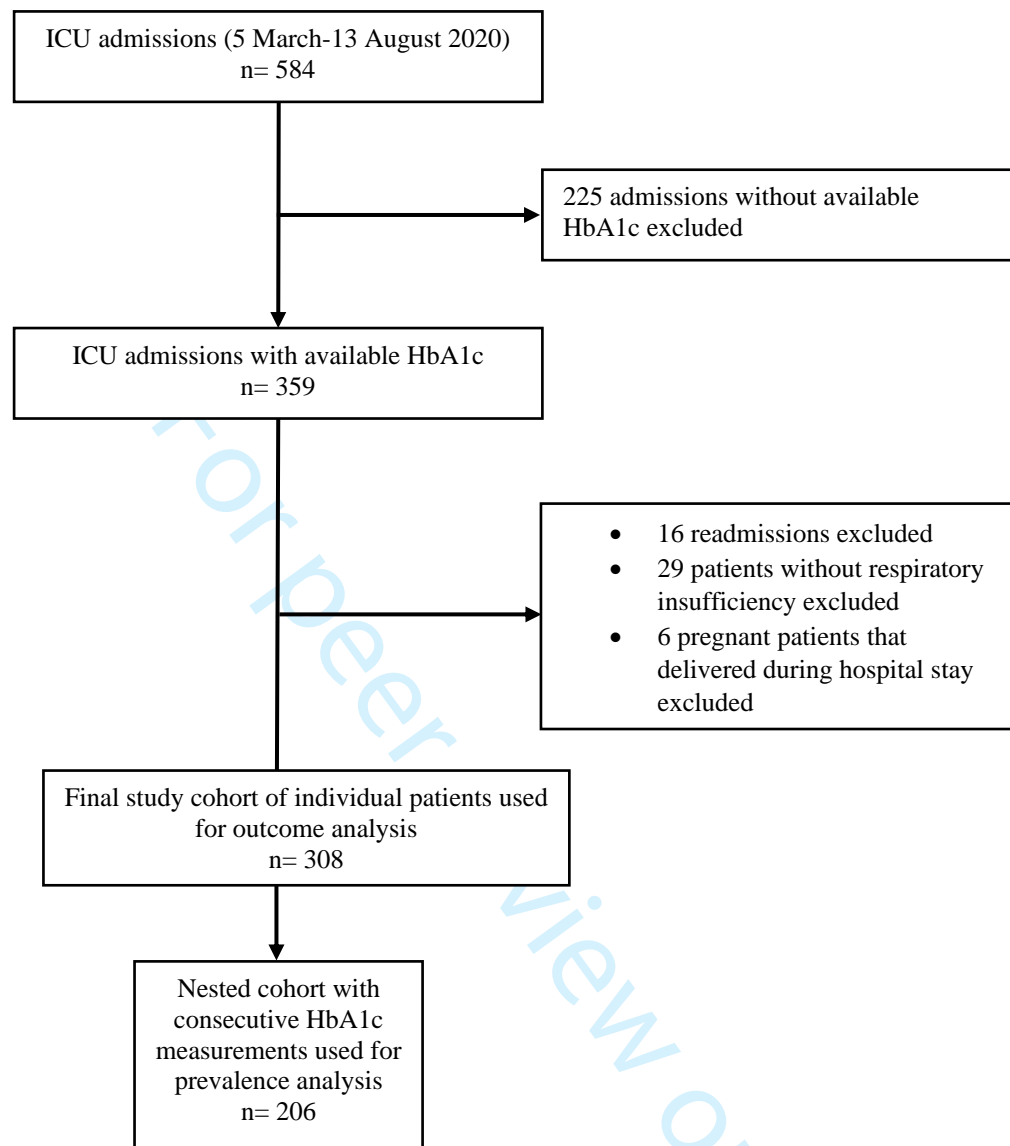

1  
2  
3  
4  
5  
6  
7  
8  
9  
10  
11  
12  
13  
14  
15  
16  
17  
18  
19  
20  
21  
22  
23  
24  
25  
26  
27  
28  
29  
30  
31  
32  
33  
34  
35  
36  
37  
38  
39  
40  
41  
42  
43  
44  
45  
46  
47  
48  
49  
50  
51  
52  
53  
54  
55  
56  
57  
58  
59  
60



Figure 2. Prevalence of prediabetes, unknown diabetes and known diabetes among 206 consecutive ICU patients with Covid-19

144x102mm (144 x 144 DPI)



Figure 3. Probability of survival in no chronic dysglycemia patients and in patients with chronic dysglycemi

770x521mm (144 x 144 DPI)

**Table S1: Post-hoc exploratory comparison between the subgroups for 90 days mortality and Renal replacement therapy**

| Subgroups                                                            | 90 day mortality               |      | Renal replacement therapy      |      |
|----------------------------------------------------------------------|--------------------------------|------|--------------------------------|------|
|                                                                      | N (%)                          | p    | N (%)                          | p    |
| No chronic dysglycemia vs Prediabetes                                | 9/61 (14.7) vs 28/114 (24.5)   | 0.17 | 17/61 (27.8) vs 22/114 (19.2)  | 0.25 |
| No chronic dysglycemia vs Unknown diabetes                           | 9/61 (14.7) vs 12/60 (20.0)    | 0.48 | 17/61 (27.8) vs 11/60 (18.3)   | 0.28 |
| No chronic dysglycemia vs Controlled diabetes                        | 9/61 (14.7) vs 7/25 (28.0)     | 0.22 | 17/61 (27.8) vs 1/25 (4.0)     | 0.01 |
| No chronic dysglycemia vs Uncontrolled diabetes                      | 9/61 (14.7) vs 15/48 (31.2)    | 0.06 | 17/61 (27.8) vs 8/48 (16.6)    | 0.25 |
| Prediabetes vs Unknown diabetes                                      | 28/114 (24.5) vs 12/60 (20.0)  | 0.57 | 22/114 (19.2) vs 11/60 (18.3)  | 1    |
| Prediabetes vs Controlled diabetes                                   | 28/114 (24.5) vs 7/25 (28.0)   | 0.79 | 22/114 (19.2) vs 1/25 (4.0)    | 0.07 |
| Prediabetes vs Uncontrolled diabetes                                 | 28/114 (24.5) vs 15/48 (31.2)  | 0.43 | 22/114 (19.2) vs 8/48 (16.6)   | 0.8  |
| Unknown diabetes vs Controlled diabetes                              | 12/60 (20.0) vs 7/25 (28.0)    | 0.41 | 11/60 (18.3) vs 1/25 (4.0)     | 0.1  |
| Unknown diabetes vs Uncontrolled diabetes                            | 12/60 (20.0) vs 15/48 (31.2)   | 0.18 | 11/60 (18.3) vs 8/48 (16.6)    | 1    |
| Controlled vs Uncontrolled diabetes                                  | 7/25 (28.0) vs 15/48 (31.2)    | 0.77 | 1/25 (4.0) vs 8/48 (16.6)      | 0.01 |
| No chronic dysglycemia and prediabetes vs unknown and known diabetes | 37/175 (21.1) vs 34/133 (25.5) | 0.41 | 39/175 (22.2) vs 20/133 (15.0) | 0.14 |

P values calculated with Fischer's exact test

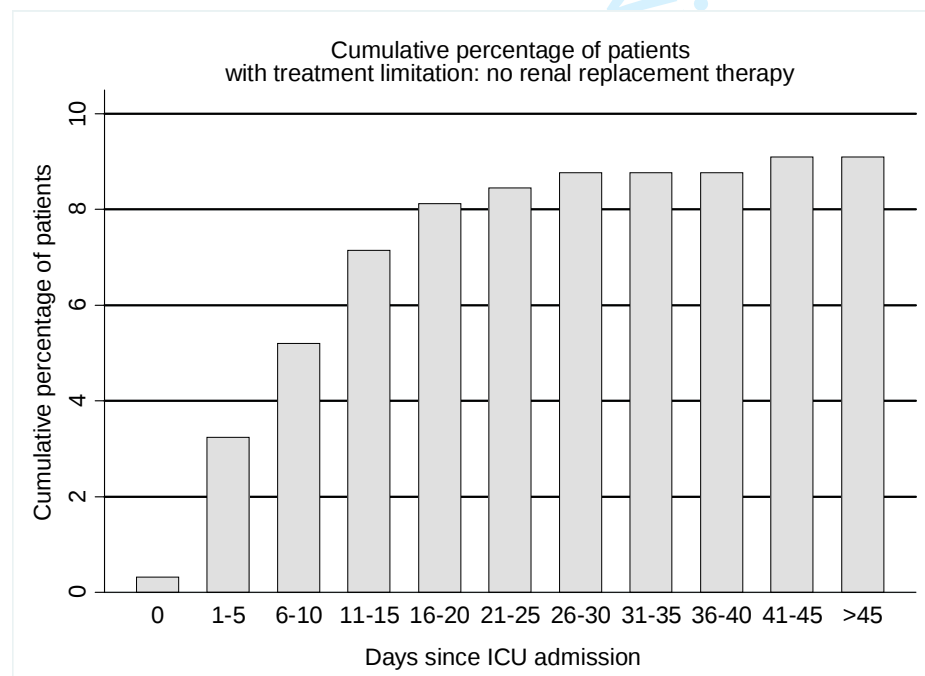

**Figure S1.** Cumulative percentage of patients with a treatment limitation: no renal replacement therapy. Day 0 (zero) denotes the day of admission to the intensive care unit.



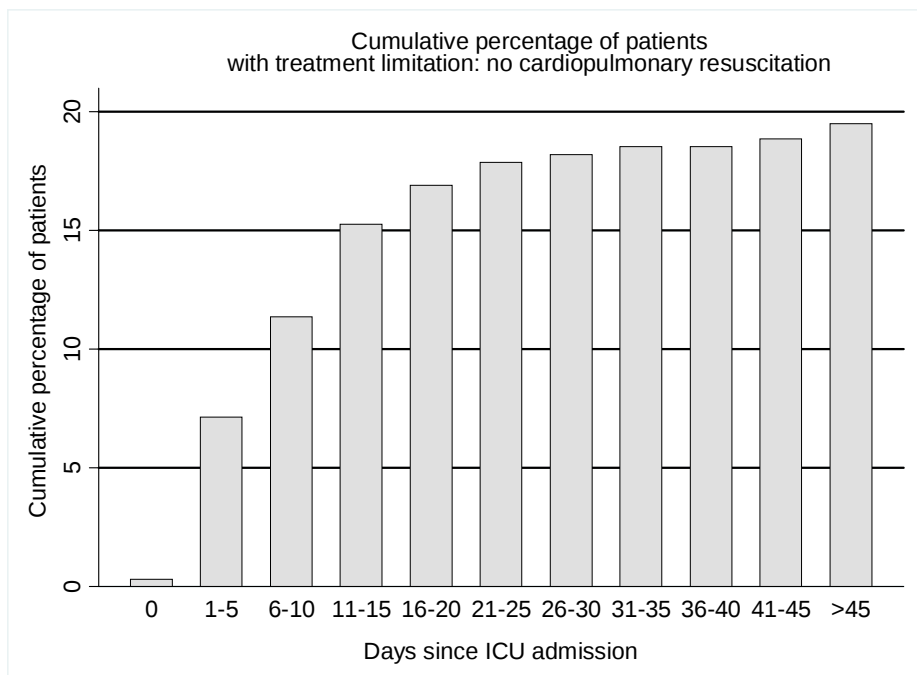

**Figure S2.** Cumulative percentage of patients with a treatment limitation: no cardiopulmonary resuscitation. Day 0 (zero) denotes the day of admission to the intensive care unit.

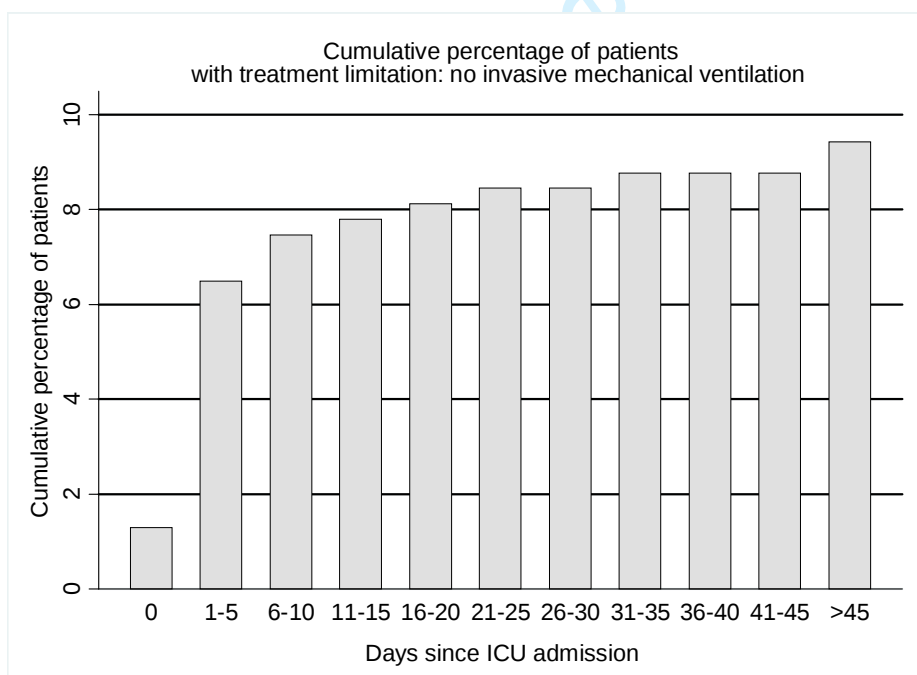

**Figure S3.** Cumulative percentage of patients with a treatment limitation: no invasive mechanical ventilation. Day 0 (zero) denotes the day of admission to the intensive care unit.

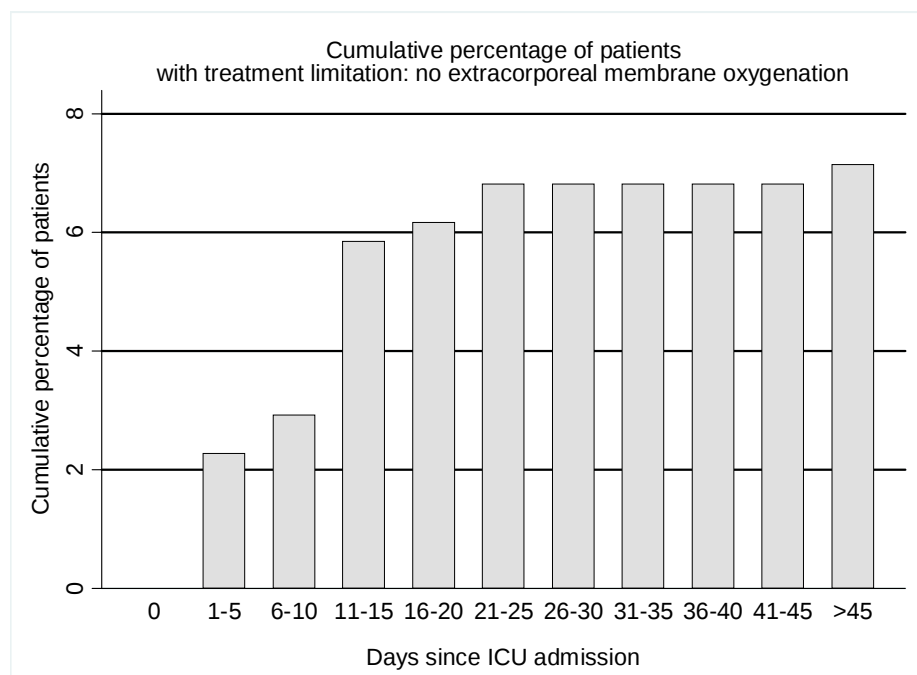

**Figure S4.** Cumulative percentage of patients with a treatment limitation: no extracorporeal membrane oxygenation. Day 0 (zero) denotes the day of admission to the intensive care unit.

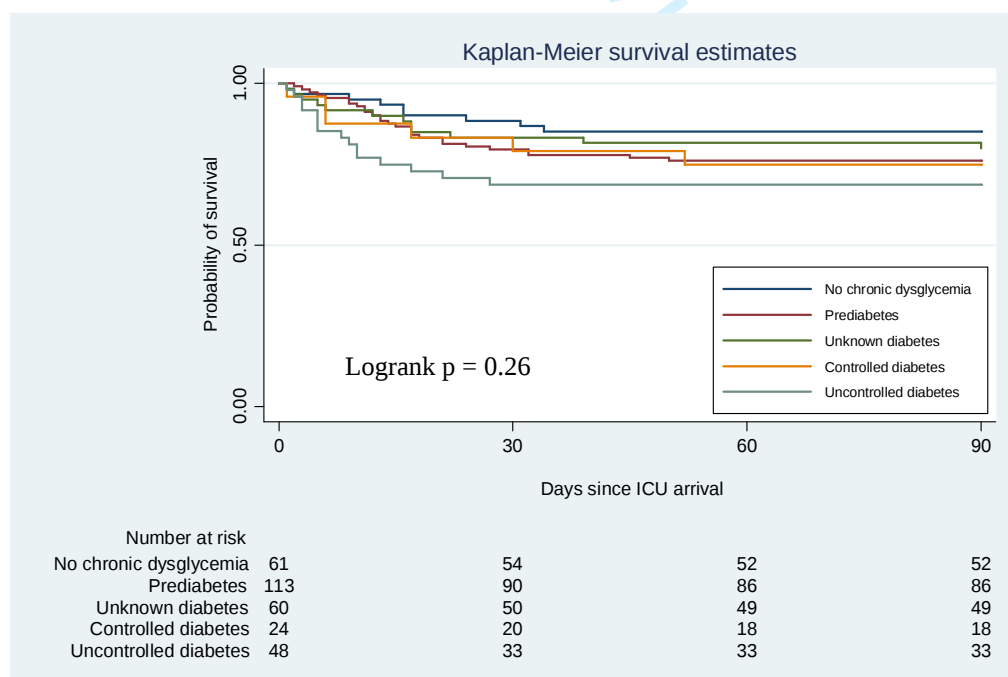

**Figure S5.** Probability of survival in the study groups

STROBE Statement—Checklist of items that should be included in reports of *cohort studies*

Page references for document: **Chronic dysglycemia in critically ill patients with Covid-19 – a retrospective cohort study**

|                              | Item No | Recommendation                                                                                                                                                                                                                                                                                                         | Page No                                  |
|------------------------------|---------|------------------------------------------------------------------------------------------------------------------------------------------------------------------------------------------------------------------------------------------------------------------------------------------------------------------------|------------------------------------------|
| <b>Title and abstract</b>    | 1       | (a) Indicate the study's design with a commonly used term in the title or the abstract<br>(b) Provide in the abstract an informative and balanced summary of what was done and what was found                                                                                                                          | 1<br>2-3                                 |
| <b>Introduction</b>          |         |                                                                                                                                                                                                                                                                                                                        |                                          |
| Background/rationale         | 2       | Explain the scientific background and rationale for the investigation being reported                                                                                                                                                                                                                                   | 3-4                                      |
| Objectives                   | 3       | State specific objectives, including any prespecified hypotheses                                                                                                                                                                                                                                                       | 4                                        |
| <b>Methods<sup>4</sup></b>   |         |                                                                                                                                                                                                                                                                                                                        |                                          |
| Study design                 | 4       | Present key elements of study design early in the paper                                                                                                                                                                                                                                                                | 4, 5                                     |
| Setting                      | 5       | Describe the setting, locations, and relevant dates, including periods of recruitment, exposure, follow-up, and data collection                                                                                                                                                                                        | 5-6                                      |
| Participants                 | 6       | (a) Give the eligibility criteria, and the sources and methods of selection of participants. Describe methods of follow-up<br>(b) For matched studies, give matching criteria and number of exposed and unexposed                                                                                                      | 5-7<br>NA                                |
| Variables                    | 7       | Clearly define all outcomes, exposures, predictors, potential confounders, and effect modifiers. Give diagnostic criteria, if applicable                                                                                                                                                                               | 7-8                                      |
| Data sources/<br>measurement | 8*      | For each variable of interest, give sources of data and details of methods of assessment (measurement). Describe comparability of assessment methods if there is more than one group                                                                                                                                   | 5-7                                      |
| Bias                         | 9       | Describe any efforts to address potential sources of bias                                                                                                                                                                                                                                                              | 5                                        |
| Study size                   | 10      | Explain how the study size was arrived at                                                                                                                                                                                                                                                                              | 5-6,<br>Figure 1                         |
| Quantitative variables       | 11      | Explain how quantitative variables were handled in the analyses. If applicable, describe which groupings were chosen and why                                                                                                                                                                                           | 6-8                                      |
| Statistical methods          | 12      | (a) Describe all statistical methods, including those used to control for confounding<br>(b) Describe any methods used to examine subgroups and interactions<br>(c) Explain how missing data were addressed<br>(d) If applicable, explain how loss to follow-up was addressed<br>(e) Describe any sensitivity analyses | 7<br>7<br>8<br>NA<br>NA                  |
| <b>Results</b>               |         |                                                                                                                                                                                                                                                                                                                        |                                          |
| Participants                 | 13*     | (a) Report numbers of individuals at each stage of study—eg numbers potentially eligible, examined for eligibility, confirmed eligible, included in the study, completing follow-up, and analysed<br>(b) Give reasons for non-participation at each stage<br>(c) Consider use of a flow diagram                        | 8-9,<br>Figure 1<br>Figure 1<br>Figure 1 |

|    |                  |     |                                                                                                                                          |       |
|----|------------------|-----|------------------------------------------------------------------------------------------------------------------------------------------|-------|
| 1  | Descriptive data | 14* | (a) Give characteristics of study participants (eg demographic, clinical, social) and information on exposures and potential confounders | 8-9   |
| 2  |                  |     |                                                                                                                                          | Table |
| 3  |                  |     |                                                                                                                                          | 1     |
| 4  |                  |     | (b) Indicate number of participants with missing data for each variable of interest                                                      | Table |
| 5  |                  |     |                                                                                                                                          | 1     |
| 6  |                  |     | (c) Summarise follow-up time (eg, average and total amount)                                                                              | NA    |
| 7  |                  |     |                                                                                                                                          |       |
| 8  | Outcome data     | 15* | Report numbers of outcome events or summary measures over time                                                                           | 10-11 |
| 9  |                  |     |                                                                                                                                          | Table |
| 10 |                  |     |                                                                                                                                          | 2-3   |

For peer review only

11  
12  
13  
14  
15  
16  
17  
18  
19  
20  
21  
22  
23  
24  
25  
26  
27  
28  
29  
30  
31  
32  
33  
34  
35  
36  
37  
38  
39  
40  
41  
42  
43  
44  
45  
46  
47  
48  
49  
50  
51  
52  
53  
54  
55  
56  
57  
58  
59  
60

|                                      |                          |    |                                                                                                                                                                                                                                                                                                                                                                                                               |                                  |
|--------------------------------------|--------------------------|----|---------------------------------------------------------------------------------------------------------------------------------------------------------------------------------------------------------------------------------------------------------------------------------------------------------------------------------------------------------------------------------------------------------------|----------------------------------|
| 1<br>2<br>3<br>4<br>5<br>6<br>7<br>8 | Main results             | 16 | (a) Give unadjusted estimates and, if applicable, confounder-adjusted estimates and their precision (eg, 95% confidence interval). Make clear which confounders were adjusted for and why they were included<br>(b) Report category boundaries when continuous variables were categorized<br>(c) If relevant, consider translating estimates of relative risk into absolute risk for a meaningful time period | 10-11<br>Table<br>3              |
| 9<br>10<br>11<br>12                  | Other analyses           | 17 | Report other analyses done—eg analyses of subgroups and interactions, and sensitivity analyses                                                                                                                                                                                                                                                                                                                | 11<br>Figure<br>2,3,S1-<br>4, S5 |
| 13                                   | <b>Discussion</b>        |    |                                                                                                                                                                                                                                                                                                                                                                                                               |                                  |
| 14                                   | Key results              | 18 | Summarise key results with reference to study objectives                                                                                                                                                                                                                                                                                                                                                      | 11                               |
| 15<br>16<br>17                       | Limitations              | 19 | Discuss limitations of the study, taking into account sources of potential bias or imprecision. Discuss both direction and magnitude of any potential bias                                                                                                                                                                                                                                                    | 14                               |
| 18<br>19<br>20<br>21                 | Interpretation           | 20 | Give a cautious overall interpretation of results considering objectives, limitations, multiplicity of analyses, results from similar studies, and other relevant evidence                                                                                                                                                                                                                                    | 15                               |
| 22                                   | Generalisability         | 21 | Discuss the generalisability (external validity) of the study results                                                                                                                                                                                                                                                                                                                                         | 13-14                            |
| 23                                   | <b>Other information</b> |    |                                                                                                                                                                                                                                                                                                                                                                                                               |                                  |
| 24<br>25<br>26                       | Funding                  | 22 | Give the source of funding and the role of the funders for the present study and, if applicable, for the original study on which the present article is based                                                                                                                                                                                                                                                 | 15                               |

\*Give information separately for exposed and unexposed groups.

**Note:** An Explanation and Elaboration article discusses each checklist item and gives methodological background and published examples of transparent reporting. The STROBE checklist is best used in conjunction with this article (freely available on the Web sites of PLoS Medicine at <http://www.plosmedicine.org/>, Annals of Internal Medicine at <http://www.annals.org/>, and Epidemiology at <http://www.epidem.com/>). Information on the STROBE Initiative is available at <http://www.strobe-statement.org>.

# BMJ Open

## Prevalence and impact of chronic dysglycemia among patients with Covid-19 in Swedish intensive care units: a multicenter, retrospective cohort study

|                                 |                                                                                                                                                                                                                                                                                                                                                                                                                                                                                                                                                                                                                                                                                                                                                                                                       |
|---------------------------------|-------------------------------------------------------------------------------------------------------------------------------------------------------------------------------------------------------------------------------------------------------------------------------------------------------------------------------------------------------------------------------------------------------------------------------------------------------------------------------------------------------------------------------------------------------------------------------------------------------------------------------------------------------------------------------------------------------------------------------------------------------------------------------------------------------|
| Journal:                        | <i>BMJ Open</i>                                                                                                                                                                                                                                                                                                                                                                                                                                                                                                                                                                                                                                                                                                                                                                                       |
| Manuscript ID                   | bmjopen-2022-071330.R2                                                                                                                                                                                                                                                                                                                                                                                                                                                                                                                                                                                                                                                                                                                                                                                |
| Article Type:                   | Original research                                                                                                                                                                                                                                                                                                                                                                                                                                                                                                                                                                                                                                                                                                                                                                                     |
| Date Submitted by the Author:   | 19-Aug-2023                                                                                                                                                                                                                                                                                                                                                                                                                                                                                                                                                                                                                                                                                                                                                                                           |
| Complete List of Authors:       | Balintescu, Anca; Karolinska Institute, Department of Clinical Science and Education, Södersjukhuset<br>Rysz, Susanne; Karolinska Institute, Department of Perioperative Medicine and Intensive Care<br>Hertz, Carl; Stockholm South General Hospital Anaesthesia Department ICU<br>Grip, Jonathan; Karolinska Institute, Department of Perioperative Medicine and Intensive Care<br>Cronhjort, Maria; Karolinska Institute, Department of Clinical Science and Education Södersjukhuset<br>Oldner, Anders; Karolinska Institute, Department of Perioperative Medicine and Intensive Care<br>Svensen, Christer; Karolinska Institute, Department of Clinical Science and Education Södersjukhuset<br>Mårtensson, Johan; Karolinska Institute, Department of Perioperative Medicine and Intensive Care |
| <b>Primary Subject Heading</b>: | Intensive care                                                                                                                                                                                                                                                                                                                                                                                                                                                                                                                                                                                                                                                                                                                                                                                        |
| Secondary Subject Heading:      | Diabetes and endocrinology                                                                                                                                                                                                                                                                                                                                                                                                                                                                                                                                                                                                                                                                                                                                                                            |
| Keywords:                       | Adult intensive & critical care < INTENSIVE & CRITICAL CARE, COVID-19, DIABETES & ENDOCRINOLOGY, General diabetes < DIABETES & ENDOCRINOLOGY                                                                                                                                                                                                                                                                                                                                                                                                                                                                                                                                                                                                                                                          |
|                                 |                                                                                                                                                                                                                                                                                                                                                                                                                                                                                                                                                                                                                                                                                                                                                                                                       |

SCHOLARONE™  
Manuscripts



I, the Submitting Author has the right to grant and does grant on behalf of all authors of the Work (as defined in the below author licence), an exclusive licence and/or a non-exclusive licence for contributions from authors who are: i) UK Crown employees; ii) where BMJ has agreed a CC-BY licence shall apply, and/or iii) in accordance with the terms applicable for US Federal Government officers or employees acting as part of their official duties; on a worldwide, perpetual, irrevocable, royalty-free basis to BMJ Publishing Group Ltd ("BMJ") its licensees and where the relevant Journal is co-owned by BMJ to the co-owners of the Journal, to publish the Work in this journal and any other BMJ products and to exploit all rights, as set out in our [licence](#).

The Submitting Author accepts and understands that any supply made under these terms is made by BMJ to the Submitting Author unless you are acting as an employee on behalf of your employer or a postgraduate student of an affiliated institution which is paying any applicable article publishing charge ("APC") for Open Access articles. Where the Submitting Author wishes to make the Work available on an Open Access basis (and intends to pay the relevant APC), the terms of reuse of such Open Access shall be governed by a Creative Commons licence – details of these licences and which [Creative Commons](#) licence will apply to this Work are set out in our licence referred to above.

Other than as permitted in any relevant BMJ Author's Self Archiving Policies, I confirm this Work has not been accepted for publication elsewhere, is not being considered for publication elsewhere and does not duplicate material already published. I confirm all authors consent to publication of this Work and authorise the granting of this licence.

# Prevalence and impact of chronic dysglycemia among patients with Covid-19 in Swedish intensive care units: a multicenter, retrospective cohort study

Anca Balintescu, MD, PhD<sup>1, 2</sup>; Susanne Rysz, MD<sup>3, 4</sup>; Carl Hertz, MD<sup>2</sup>; Jonathan Grip, MD, PhD<sup>3, 5</sup>; Maria Cronhjort, MD, PhD<sup>1, 2</sup>; Anders Oldner MD, PhD<sup>3, 6</sup>; Christer Svensen MD, PhD<sup>1, 2</sup>; Johan Mårtensson, MD, PhD<sup>3, 6</sup>

<sup>1</sup> Department of Clinical Science and Education Karolinska Institute, Unit of Anesthesiology and Intensive Care, South General Hospital, Sjukhusbacken 10, 11883 Stockholm, Sweden

<sup>2</sup> Department of Anesthesia and Intensive Care, South General Hospital, Sjukhusbacken 10, 11883 Stockholm, Sweden

<sup>3</sup> Department of Perioperative Medicine and Intensive Care, Karolinska University Hospital, Norrbacka S2:05, SE-17176 Stockholm, Sweden

<sup>4</sup> Department of Medicine, Solna, Karolinska Institute, Stockholm, Sweden

<sup>5</sup> Department of Clinical Science, Intervention and Technology, Karolinska Institute, Stockholm, Sweden

<sup>6</sup> Department of Physiology and Pharmacology, Section of Anaesthesia and Intensive Care, Karolinska Institutet, Norrbacka S2:05, SE-17176 Stockholm, Sweden

## Corresponding Author:

Anca Balintescu, ANOPIVA, South General Hospital, Sjukhusbacken 10, 11883 Stockholm, Sweden. Phone: +46 (0)722 7023 83. Fax: +46 (0)8-616 22 08. Email: [anca.balintescu@ki.se](mailto:anca.balintescu@ki.se)



Keywords: HbA1c, ICU, Covid-19, prevalence, glycemic control, diabetes

## Abstract

**Objective:** Using glycated hemoglobin A1c (HbA1c) screening, we aimed to determine the prevalence of chronic dysglycemia among patients with Covid-19 admitted to the intensive care unit (ICU). Additionally, we aimed to explore the association between chronic dysglycemia and clinical outcomes related to ICU stay.

**Design:** Multicenter retrospective observational study

**Setting:** ICUs in three hospitals in Stockholm, Sweden

**Participants:** Covid-19 patients admitted to the ICU between 5 March and 13 August 2020 with available HbA1c at admission. Chronic dysglycemia was determined based on previous diabetes history and HbA1c.

**Primary and secondary outcomes:** Primary outcome was the actual prevalence of chronic dysglycemia (prediabetes, unknown diabetes, or known diabetes) among Covid-19 patients. Secondary outcome was the association of chronic dysglycemia with 90-day mortality, ICU length of stay, duration of invasive mechanical ventilation (IMV), and renal replacement therapy (RRT), accounting for treatment selection bias.

**Results:** A total of 308 patients with available admission HbA1c were included. Chronic dysglycemia prevalence assessment was restricted to 206 patients admitted ICUs in which HbA1c was measured on all admitted patients. Chronic dysglycemia was present in 82.0% (95% CI 76.1%-87.0%) of patients, with prediabetes present in 40.2% (95% CI 33.5%-47.3%), unknown diabetes in 20.9% (95% CI 15.5%-27.1%), well-controlled diabetes in 7.8% (95% CI 4.5%-12.3%), and uncontrolled diabetes in 13.1% (95% CI 8.8%-18.5%). All patients with available HbA1c were included for the analysis of the relationship between chronic dysglycemia and secondary outcomes.

1  
2  
3 We found no independent association between chronic dysglycemia and 90-day  
4 mortality, ICU length of stay, or duration of IMV. After excluding patients with specific  
5 treatment limitations, no association between chronic dysglycemia and RRT use was  
6 observed.  
7  
8  
9  
10  
11

12 **Conclusions:** In our cohort of critically ill Covid-19 patients, the prevalence of chronic  
13 dysglycemia was 82%. We found no robust associations between chronic dysglycemia  
14 and clinical outcomes when accounting for treatment limitations.  
15  
16  
17  
18  
19  
20  
21  
22  
23

### 24 **Strengths and limitations of this study**

- 25 • Presents prevalence of chronic dysglycemia in an ICU population with Covid-  
26 19 based on additional quantification of admission HbA1c
- 27 • Actual prevalence of chronic dysglycemia calculation in all ICU admitted  
28 patients, reducing the risk of ascertainment bias
- 29 • Treatment limitations were considered in the analysis of clinical outcomes,  
30 thereby reducing the risk of treatment selection bias.
- 31 • We lack data on glycemetic control during ICU stay, that might have influenced  
32 clinical outcomes  
33  
34  
35  
36  
37  
38  
39  
40  
41  
42  
43  
44  
45  
46  
47  
48  
49

### 50 **Background**

51 Diabetes has been identified as a frequent comorbidity in patients with Covid-19, with  
52 a prevalence ranging from 7.4% to 34.3% among those requiring hospitalization [1-  
53 3]. A meta-analysis published in April 2020 found diabetes to be the second most  
54 frequent comorbidity in patients with Covid-19 admitted to the intensive care unit  
55  
56  
57  
58  
59  
60

1  
2  
3 (ICU) [4]. Furthermore, Covid-19 patients with diabetes appear to have a significantly  
4  
5 higher risk of ICU admission and worse prognosis than Covid-19 patients without  
6  
7 diabetes [4-6]. Particularly, a glycated hemoglobin A1c (HbA1c) level above 7% (53  
8  
9 mmol/mol) was identified as risk factor for ICU admission [7].

10  
11  
12 Recent data also indicates that diabetes is associated with worse prognosis among  
13  
14 ICU patients with Covid-19 [8]. However, these studies did not include HbA1c  
15  
16 measurements to identify patients with prediabetes or previously undiagnosed  
17  
18 diabetes. This is an important limitation since both prediabetes and diabetes is  
19  
20 considerably under-diagnosed both in the community [9] and in the ICU [10].

21  
22 Additionally, a history of diabetes diagnosis and HbA1c at ICU admission, measured  
23  
24 in consecutively admitted patients, is important in determining the true prevalence of  
25  
26 chronic dysglycemia in the critically ill Covid-19 population. Finally, information about  
27  
28 limitations of life-sustaining treatment were not considered in previous outcome  
29  
30 analyses. This is unfortunate since the presence of such limitations may introduce  
31  
32 treatment selection bias.

33  
34 We therefore conducted a multicenter observational study using quantification of  
35  
36 HbA1c and information about diabetes history to determine the actual prevalence of  
37  
38 chronic dysglycemia (prediabetes, unknown diabetes, or known diabetes) among  
39  
40 Covid-19 patients admitted to ICU. In addition, we aimed to explore the relationship  
41  
42 of chronic dysglycemia with 90-day mortality, ICU length of stay, duration of invasive  
43  
44 mechanical ventilation (IMV) and severe acute kidney injury requiring renal  
45  
46 replacement therapy (RRT) accounting for treatment selection bias. We hypothesised  
47  
48 that prevalence of chronic dysglycemia in Covid-19 patients admitted to the ICU  
49  
50 exceeds the prevalence of chronic dysglycemia in the non Covid-19 critically ill  
51  
52  
53  
54  
55  
56  
57  
58  
59  
60

1  
2  
3 population. Moreover, we hypothesised that such chronic dysglycemia would be  
4  
5 associated with worse clinical outcomes during ICU stay in patients with Covid-19.  
6  
7  
8  
9

## 10 11 12 **Material and Methods**

13  
14 The study was approved by the Swedish Ethical Review Authority (approval number  
15  
16 2020-01302, amendment 2020-02890) with a waiver of informed consent. The study  
17  
18 was performed in accordance with the Helsinki Declaration and reported in  
19  
20 conformity with the STROBE statement [11]  
21  
22

23  
24 Patient and Public Involvement statement: The study is based on data that was  
25  
26 collected during the ongoing Covid-19 pandemic in a quality register. No intervention  
27  
28 was applied to the individual patient. The public and patients were not involved in the  
29  
30 design of the study. Results are to be disseminated to the public and scientific  
31  
32 community through publication in peer-reviewed journal with open access.  
33  
34  
35  
36

### 37 *Study design*

38  
39 We conducted a multicenter, retrospective observational study of adult ( $\geq 18$  years)  
40  
41 patients with a positive polymerase chain reaction (PCR) for severe acute respiratory  
42  
43 syndrome coronavirus 2 (SARS-CoV-2) admitted to ten ICUs in three hospitals in  
44  
45 Stockholm, Sweden between March 5<sup>th</sup> and August 13<sup>th</sup>, 2020 (first wave). We  
46  
47 excluded patients without HbA1c obtained on admission to the ICU, patients in the  
48  
49 third trimester of pregnancy and patients with a primary admission diagnosis other  
50  
51 than Covid-19. In patients with multiple ICU admissions, only the first admission was  
52  
53 considered. All included patients were assessed in the outcome analyses.  
54  
55  
56  
57

58 Assessment of chronic dysglycemia prevalence was restricted to a nested cohort of  
59  
60

1  
2  
3 patients from ICUs in which HbA1c measurement was included in the routine  
4  
5 laboratory panel performed on all consecutive admissions. In the prevalence  
6  
7 analysis, we therefore excluded patients with available HbA1c who were admitted to  
8  
9 ICUs in which HbA1c was measured only at the discretion of the treating clinicians.  
10  
11  
12  
13

#### 14 *Data collection*

15  
16 HbA1c was measured in whole blood at ICU admission using the VARIANT II  
17  
18 TURBO Hemoglobin Testing System analyzer (Bio-Rad Laboratories GmbH) and  
19  
20 was reported in mmol/mol (IFCC calibrated) and in %. HbA1c was measured as part  
21  
22 of routine care in three ICUs and at the discretion of the treating clinician in seven  
23  
24 ICUs. We collected information on demographics, comorbidity, chronic medication,  
25  
26 HbA1c value, mortality and decision regarding limitation of life-sustaining care from  
27  
28 the patients' medical records (Take Care [CompuGroup Medical, Koblenz,  
29  
30 Germany]). International Classification of Disease (ICD) 10 codes were used to  
31  
32 identify comorbidity and previous history of diabetes. Additionally, data regarding  
33  
34 known diabetes diagnosis was extracted manually from the patients' medical records.  
35  
36  
37  
38  
39 Data on body mass index (BMI), Simplified Acute Physiology Score (SAPS) 3, ICU  
40  
41 length of stay, duration of IMV and RRT were collected from the ICU electronic  
42  
43 patient data management system Clinisoft (GE, Barrington, IL).  
44  
45  
46  
47  
48

#### 49 *Prediabetes and Diabetes definitions*

50  
51 Prediabetes and diabetes were diagnosed based on two complementary methods;  
52  
53 level of HbA1c at admission and previous medical history of diabetes, and  
54  
55 categorized into five groups:  
56  
57

58 (1) no diabetes (HbA1c <42 mmol/mol [6.0%] and no history of diabetes)  
59  
60

1  
2  
3 (2) prediabetes (HbA1c 42-47 mmol/mol [6.0-6.4%] and no history of diabetes)

4  
5 (3) unknown diabetes (HbA1c  $\geq$ 48 mmol/mol [6.5 %] and no history of diabetes)

6  
7 (4) controlled diabetes (HbA1c  $<$ 52 mmol/mol [6.9 %] and previous history of  
8  
9 diabetes)

10  
11 (5) uncontrolled diabetes (HbA1c  $\geq$ 52 mmol/mol [6.9 %] and previous history of  
12  
13 diabetes).

14  
15  
16 In Sweden, the diagnosis of prediabetes and diabetes is based on the World Health  
17  
18 Organisation's (WHO) HbA1c cut off values [12], not the American Diabetes  
19  
20 Association's (ADA). Therefore, we used the WHO criteria to classify the study  
21  
22 groups in our research.

23  
24  
25 Individuals in group (2), (3), (4) and (5) were considered to have chronic dysglycemia  
26  
27 compared to those in group (1) labeled "no chronic dysglycemia".  
28  
29

### 30 31 32 33 *Outcomes*

34  
35 The primary outcome was the prevalence of chronic dysglycemia. Secondary  
36  
37 outcomes included 90-day mortality, ICU length of stay, duration of IMV, and RRT  
38  
39 use.  
40  
41

### 42 43 44 45 *Statistical Analysis*

46  
47 We analyzed data using STATA version 12.1 (Stata Corp., College Station, Texas).  
48  
49 Categorical data is presented as numbers and percentages and compared using the  
50  
51 Fisher's exact test. Continuous data is summarized as median with interquartile  
52  
53 range (IQR) and compared using the Mann-Whitney U test. The prevalence of  
54  
55 chronic dysglycemia (primary outcome) was presented as percentages with 95%  
56  
57 confidence intervals (CI). We displayed time to death within 90 days using Kaplan-  
58  
59  
60

1  
2  
3 Meier curves. Survival curves were compared using a log-rank test. We used  
4  
5 multivariable Cox regression analysis to assess the association between chronic  
6  
7 dysglycemia and 90-day mortality. We used multivariable linear regression analysis  
8  
9 to assess the association with ICU length of stay and duration of IMV. Both these  
10  
11 outcomes were found to be well approximated by log-normal distributions and were  
12  
13 therefore log-transformed before analysis with results presented as geometric means  
14  
15 (95% CI). We used multivariable logistic regression analysis to assess the  
16  
17 association with RRT use, before and after excluding patients with RRT as a  
18  
19 treatment limitation. All regression analyses were conducted using the following  
20  
21 models: adjusted for SAPS 3, age and sex, and adjusted for SAPS 3, age, sex,  
22  
23 hypertension, any malignancy, any treatment limitation on admission and chronic  
24  
25 corticosteroid use. A post-hoc exploratory comparison between subgroups was done  
26  
27 for 90 day mortality and RRT use. A two-sided P-value <0.05 was considered  
28  
29 statistically significant.  
30  
31  
32  
33  
34  
35  
36  
37

## 38 **Results**

### 39 *Patients*

40  
41 A total of 584 patients with positive SARS-CoV-2 test were admitted to the study  
42  
43 ICUs during the study period. We excluded 225 patients without available HbA1c, six  
44  
45 pregnant patients, 16 readmissions and 29 patients without symptoms associated  
46  
47 with Covid-19. Therefore, we included 308 patients with available HbA1c for outcome  
48  
49 analysis. Among those 308 patients, 206 consequently admitted patients in which  
50  
51 HbA1c was included in the admission routine laboratory panel were used for  
52  
53 prevalence calculation (Figure 1). Baseline characteristics and treatment limitations  
54  
55 of the entire study population are detailed in Table 1.  
56  
57  
58  
59  
60

**Table 1.** Baseline characteristics and treatment limitations

| Characteristic                                   | Chronic dysglycemia    |             |                  |                     |                       | P <sup>e</sup> |
|--------------------------------------------------|------------------------|-------------|------------------|---------------------|-----------------------|----------------|
|                                                  | No chronic dysglycemia | Prediabetes | Unknown diabetes | Controlled diabetes | Uncontrolled diabetes |                |
| No. (%)                                          | 61 (19.8)              | 114 (37.0)  | 60 (19.4)        | 25 (8.1)            | 48 (15.5)             |                |
| Age, years                                       | 57 (51.63)             | 61 (53, 68) | 60 (52, 68)      | 63 (57, 71)         | 62 (55.69)            | 0.03           |
| Male sex                                         | 48 (78.6)              | 92 (80.7)   | 47 (78.3)        | 21 (84.0)           | 36 (75.0)             | 1.00           |
| Body mass index <sup>a</sup> , kg/m <sup>2</sup> | 27 (25, 32)            | 27 (25, 30) | 28 (25, 31)      | 29 (26, 32)         | 30 (26, 33)           | 0.97           |
| HbA1c, mmol/mol                                  | 39 (36, 40)            | 44 (43, 46) | 51 (49, 57)      | 47 (44, 49)         | 70 (61, 81)           | <0.001         |
| Diabetes treatment                               |                        |             |                  |                     |                       |                |
| Diet only                                        |                        |             |                  | 6 (24.0)            | 2 (4.1)               |                |
| OAD only                                         |                        |             |                  | 17 (68)             | 19 (39.5)             |                |
| Insulin only                                     |                        |             |                  | 1 (4.0)             | 12 (25.0)             |                |
| OAD+Insulin                                      |                        |             |                  | 1 (4.0)             | 15 (31.2)             |                |
| Comorbidity                                      |                        |             |                  |                     |                       |                |
| Hypertension                                     | 18 (29.5)              | 40 (35.0)   | 23 (38.3)        | 16 (64.0)           | 34 (70.8)             | 0.02           |
| Heart failure                                    | 6 (9.8)                | 5 (4.3)     | 6 (10.0)         | 0 (0.0)             | 3 (6.2)               | 0.24           |
| Previous myocardial infarction                   | 2 (3.2)                | 4 (3.5)     | 6 (10.0)         | 0 (0.0)             | 7 (14.5)              | 0.38           |
| Chronic kidney disease                           | 4 (6.5)                | 13 (11.4)   | 7 (11.6)         | 6 (24.0)            | 11 (22.9)             | 0.09           |
| Liver disease                                    | 2 (3.2)                | 4 (3.5)     | 1 (1.6)          | 1 (4.0)             | 1 (2.0)               | 1.00           |
| Any malignancy                                   | 0 (0.0)                | 8 (7.0)     | 2 (3.3)          | 2 (8.0)             | 4 (8.3)               | 0.04           |
| Asthma/COPD                                      | 13 (21.3)              | 20 (17.5)   | 14 (23.3)        | 5 (20.0)            | 9 (18.7)              | 0.72           |
| SAPS 3 <sup>b</sup>                              | 53 (48, 60)            | 55 (49, 60) | 57 (52, 62)      | 59 (52, 63)         | 56 (52, 69)           | 0.18           |
| Chronic drug use                                 |                        |             |                  |                     |                       |                |
| Corticosteroids <sup>c</sup>                     | 5 (8.20)               | 16 (14.04)  | 8 (13.3)         | 4 (16.0)            | 6 (12.5)              | 0.24           |
| Immunosuppressive therapy <sup>d</sup>           | 1 (1.6)                | 8 (7.0)     | 3 (5.0)          | 1 (4.0)             | 1(2.0)                | 0.31           |
| Treatment limitations <sup>f</sup>               |                        |             |                  |                     |                       |                |
| Any limitation                                   | 14 (22.9)              | 19 (16.6)   | 13 (21.6)        | 8 (32.0)            | 13 (27.0)             | 0.86           |
| No RRT                                           | 5 (8.2)                | 7 (6.1)     | 5 (8.3)          | 5 (20.0)            | 6 (12.5)              | 1.00           |
| No IMV                                           | 6 (9.8)                | 10 (8.7)    | 4 (6.6)          | 4 (16.0)            | 6 (12.5)              | 1.00           |
| No CPR                                           | 9 (14.7)               | 19 (16.6)   | 12 (20.0)        | 8 (32.0)            | 12 (25.0)             | 0.36           |
| No ECMO                                          | 7 (11.4)               | 3 (2.6)     | 5 (8.3)          | 3 (12.0)            | 3 (6.2)               | 0.15           |
| Palliative care <sup>g</sup>                     | 1 (1.6)                | 18 (16.5)   | 7 (12.2)         | 4 (16.6)            | 5 (10.8)              | 0.006          |

Data are n (%) or median (interquartile range)

HbA1c, glycated hemoglobin A1c; OAD, oral hypoglycemic agent; COPD, Chronic obstructive pulmonary disease; SAPS, Simplified Acute Physiology Score, 2 missing values (306 patients with data); RRT, renal replacement therapy; IMV, invasive mechanical ventilation; CPR, cardiopulmonary resuscitation

<sup>a</sup>Missing data in 15 patients (293 patients with data)

<sup>b</sup>Missing data in 2 patients (306 patients with data)

<sup>c</sup>Systemic or inhalatory corticosteroids

<sup>d</sup>Immunosuppressive therapy was defined as: treatment with Metotrexate, Azatioprin, Ciklosporin, Tracolimus, Infliximab

<sup>e</sup>P values for the comparison between no chronic dysglycemia and chronic dysglycemia, Mann-Whitney U test was used for comparison of continuous data and Fischer's exact test for comparison of categorical data

<sup>f</sup>Decision taken any time during ICU stay

<sup>g</sup>Decision to go over to palliative care taken during ICU stay



1  
2  
3 Patients with chronic dysglycemia were older, were more likely to have hypertension,  
4 malignancy and/or chronic kidney disease, and had higher SAPS 3 than patients  
5 without chronic dysglycemia. Overall, 14 (22.9%) patients in the no chronic  
6 dysglycemia group and 53 (21.5%) patients in the chronic dysglycemia group  
7 received one or more limitations of life-supporting therapies during their ICU stay.  
8 “No Cardiopulmonary resuscitation (CPR)” was the most common treatment  
9 limitation. We observed the highest proportion of limitations among patients with  
10 known (controlled or uncontrolled) diabetes. Decision to switch to palliative care was  
11 made in 1 (1.6%) patient in the no chronic dysglycemia group and 34 (13.8%)  
12 patients in the chronic dysglycemia group (P=0.006). Cumulative percentage of  
13 treatment limitations relative ICU admission is displayed in Figures S1-S4.  
14  
15  
16  
17  
18  
19  
20  
21  
22  
23  
24  
25  
26  
27  
28  
29

### 30 *Primary outcome*

31  
32 In the nested cohort of 206 consecutive patients with available HbA1c, 169 (82.0%;  
33 95% CI 76.1%-87.0%) were diagnosed with chronic dysglycemia. Prediabetes was  
34 present in 83 (40.2%, 95% CI 33.5%-47.3%), unknown diabetes in 43 (20.9%, 95%  
35 CI 15.5%-27.1%), well-controlled diabetes in 16 (7.8%, 95% CI 4.5%-12.3%), and  
36 uncontrolled diabetes in 27 (13.1%, 95% CI 8.8%-18.5%) patients (Figure 2).  
37  
38  
39  
40  
41  
42  
43  
44  
45  
46

### 47 *Secondary outcomes*

48  
49 Nine (14.7%) patients in the no chronic dysglycemia group and 62 (25.1%) patients  
50 in the chronic dysglycemia group died within 90 days (P=0.09) (Table 2, Figure 3 and  
51 Figure S5). ICU length of stay and duration of IMV were similar in the two groups.  
52 IMV was delivered to 42 (68.8%) patients without chronic dysglycemia and to 187  
53 (75.7%) patients with chronic dysglycemia (P=0.32). RRT was delivered to 17  
54  
55  
56  
57  
58  
59  
60

(27.9%) no chronic dysglycemia patients and 42 (17.0%) chronic dysglycemia patients (P=0.06) (Table 2 and Table 3).

**Table 2.** Secondary outcomes

| Outcomes                              | Chronic dysglycemia             |                       |                           |                              |                                | P <sup>a</sup> |
|---------------------------------------|---------------------------------|-----------------------|---------------------------|------------------------------|--------------------------------|----------------|
|                                       | No chronic dysglycemia (n = 61) | Prediabetes (n = 114) | Unknown diabetes (n = 60) | Controlled diabetes (n = 25) | Uncontrolled diabetes (n = 48) |                |
| 90-day mortality, n (%)               | 9 (14.7)                        | 28 (24.5)             | 12 (20.0)                 | 7 (28.0)                     | 15 (31.2)                      | 0.09           |
| ICU length of stay, days              | 9 (4, 25)                       | 14 (6, 24)            | 13 (6, 28)                | 8 (5, 21)                    | 11 (7, 22)                     | 0.69           |
| Invasive mechanical ventilation, days | 16 (8, 29)                      | 14 (10, 23)           | 15 (10, 27)               | 15 (6, 21)                   | 14 (9, 22)                     | 0.60           |
| Renal replacement therapy, n (%)      | 17 (27.9)                       | 22 (19.3)             | 11 (18.3)                 | 1 (4.0)                      | 8 (16.6)                       | 0.06           |

Data are n (%) or median (interquartile range)

ICU lengths of stay (4 missing values because of transfer to other hospital)

<sup>a</sup>P values for the comparison between no chronic dysglycemia and chronic dysglycemia, Mann-Whitney U test was used for comparison of continuous data and Fischer's exact test for comparison of categorical data.

**Table 3.** Multivariable regression analyses showing the association of chronic dysglycemia (versus no chronic dysglycemia) with secondary outcomes

| Outcome measure                                       | No Chronic Dysglycemia | Chronic Dysglycemia | Adjusted Risk Estimate (95% CI) <sup>a</sup> | P <sup>a</sup> | Adjusted Risk Estimate (95% CI) <sup>b</sup> | P <sup>b</sup> | Statistical test  |
|-------------------------------------------------------|------------------------|---------------------|----------------------------------------------|----------------|----------------------------------------------|----------------|-------------------|
| <b>90-day mortality n (%)</b>                         | 9/61 (14.7)            | 62/247 (25.1)       | 1.61 (0.79 to 3.26)                          | 0.18           | 1.54 (0.74 to 3.19)                          | 0.24           | Cox regression    |
| <b>ICU length of stay, days</b>                       |                        |                     |                                              |                |                                              |                |                   |
| All patients                                          | 9 (4, 25)              | 13 (6, 23)          | 1.06 (0.78 to 1.43)                          | 0.70           | 1.05 (0.77 to 1.44)                          | 0.71           | Linear regression |
| ICU survivors <sup>c</sup>                            | 9 (5, 27)              | 14 (7, 24)          | 1.04 (0.76 to 1.43)                          | 0.75           | 1.05 (0.76 to 1.44)                          | 0.75           | Linear regression |
| <b>Invasive mechanical ventilation duration, days</b> |                        |                     |                                              |                |                                              |                |                   |
| All patients <sup>d</sup>                             | 16 (8, 29)             | 14 (10, 23)         | 0.92 (0.68 to 1.23)                          | 0.58           | 0.93 (0.69 to 1.24)                          | 0.63           | Linear regression |
| ICU survivors <sup>e</sup>                            | 16 (8, 30)             | 15 (10, 23)         | 0.93 (0.70 to 1.23)                          | 0.61           | 0.92 (0.70 to 1.22)                          | 0.59           | Linear regression |
| <b>Renal replacement therapy, n (%)</b>               |                        |                     |                                              |                |                                              |                |                   |

|                                                 |              |               |                     |      |                     |      |                     |
|-------------------------------------------------|--------------|---------------|---------------------|------|---------------------|------|---------------------|
| All patients                                    | 17/61 (27.9) | 42/247 (17.0) | 0.52 (0.26 to 1.02) | 0.06 | 0.49 (0.24 to 0.99) | 0.04 | Logistic regression |
| Patients without treatment limitation as no RRT | 17/57 (29.8) | 42/224 (18.8) | 0.52 (0.26 to 1.04) | 0.10 | 0.52 (0.25 to 1.07) | 0.08 | Logistic regression |

<sup>a</sup>Multivariable models were adjusted for Simplified Acute Physiology Score (SAPS) 3, age and sex.

<sup>b</sup>Multivariable models were adjusted for Simplified Acute Physiology Score (SAPS) 3, age, sex, hypertension, any malignancy, any treatment limitation on admission and chronic corticosteroid use

<sup>c</sup>ICU length of stay in ICU survivors, 260 observations

<sup>d</sup>Invasive mechanical ventilation duration, 227 observations

<sup>e</sup>Invasive mechanical ventilation duration in ICU survivors, 189 observations

On multivariable regression analysis we observed a numerically higher mortality (adjusted HR 1.54, 95% CI 0.74-3.19, P=0.24) and significantly lower RRT use (adjusted OR 0.49, 95% CI 0.24-0.99, P=0.04) in patients with chronic dysglycemia (Table 3). No association with RRT was observed after exclusion of patients with “No RRT” as treatment limitation. In the post-hoc exploratory comparison between subgroups, RRT use was higher in the no diabetes group compared to the controlled diabetes group, as well as in the uncontrolled diabetes compared to controlled diabetes group (Table S1). Individuals with uncontrolled diabetes had the lowest probability of survival followed by individuals with controlled diabetes and prediabetes. The highest probability of survival was observed among patients with no chronic dysglycemia and prediabetes, respectively (Figure S5). However, we observed no statistically significant differences in mortality in the post-hoc comparison of subgroups (Table S1).

## Discussions

### *Key findings*

We performed a multicenter observational investigation to determine the prevalence of chronic dysglycemia and its impact on clinical outcomes among Covid-19 patients

1  
2  
3 admitted to ICU. Using available information about the patients' diabetic status in  
4  
5 combination with routine HbA1c assessment, we found that 82% had chronic  
6  
7 dysglycemia with two thirds having either prediabetes or undiagnosed diabetes. We  
8  
9 observed numerically higher 90-day mortality in patients with chronic dysglycemia,  
10  
11 with the highest mortality (31%) observed among those with uncontrolled diabetes.  
12  
13 Conversely, the proportion of patients receiving RRT was lower among patients with  
14  
15 chronic dysglycemia even when patients without "No RRT" as treatment limitation  
16  
17 were considered separately. We found no association of chronic dysglycemia with  
18  
19 ICU length of stay or duration of IMV.  
20  
21  
22  
23  
24  
25

### 26 *Relationship with previous studies*

27  
28 A global meta-analysis of more than 16000 ICU patients with Covid-19 suggests a  
29  
30 pooled prevalence of known diabetes between 23-31% [13], close to the observed  
31  
32 prevalence in our study (21%). However, few studies have used additional HbA1c  
33  
34 measurements to assess the actual prevalence of chronic dysglycemia, including  
35  
36 prediabetes and undiagnosed diabetes. One such ICU study from Austria found a  
37  
38 prevalence of chronic dysglycemia of 85%, which is in close agreement with our  
39  
40 findings [14]. However, the Austrian study did not assess consecutive patients and  
41  
42 may therefore be prone to selection bias.  
43  
44  
45

46  
47 Our findings indicate that chronic dysglycemia is more common in Covid-19 patients  
48  
49 than in ICU patients with other admission diagnoses. In fact, in a pre-Covid-19 cohort  
50  
51 of general ICU patients we found a corresponding dysglycemia prevalence of 33%  
52  
53 [10]. The relationship between severe SARS-CoV-2 infection and dysglycemia has  
54  
55 different potential explanations. SARS-CoV-2 enters cells in various organs, including  
56  
57 the pancreas, via angiotensin-converting enzyme II (ACE2). As ACE2 is involved in  
58  
59  
60

1  
2  
3 regulating pancreatic beta-cell function, a link between SARS-CoV-2 infection and  
4 beta-cell dysfunction and diabetes development has been suggested [15].  
5

6  
7 Interestingly, the prevalence of elevated HbA1c below the diabetes diagnostic  
8 threshold (prediabetes) was markedly higher in our Covid-19 cohort than in our  
9 previous pre-Covid-19 cohort (40% vs 9%). It is possible that the duration of Covid-  
10 19 symptoms before ICU admission (typically ten days in the literature [16]) was  
11 sufficient to trigger new onset hyperglycemia with mildly elevated HbA1c.  
12  
13

14  
15 In addition to the above speculations about SARS-CoV-2 as a *cause* of dysglycemia,  
16 there is also evidence suggesting that patients with preexisting dysglycemia are  
17 prone to a more severe course of Covid-19. For example, some studies have shown  
18 that hospitalized SARS-CoV-2 positive with prediabetes, unknown diabetes, and  
19 known poorly controlled diabetes are at increased risk of SARS-CoV-2 associated  
20 respiratory failure requiring intensive care [17]. A higher burden of comorbidities,  
21 hyperglycemia *per se*, and chronic low-grade inflammation in diabetes may explain  
22 this observation [18].  
23  
24

25  
26 Wang et al identifies fasting glucose as an independent predictor for 28-day mortality  
27 in hospitalized individuals with Covid-19 and previously unknown diabetes. However,  
28 HbA1c was not assessed and interference from stress hyperglycemia might have led  
29 to the different results compared to our study [19].  
30  
31

32  
33 Others [20], identified an increased risk of death in individuals with diabetes and  
34 increasing levels of HbA1c above 48 mmol/mol and known diabetes in a large cohort  
35 of hospitalized patients, but not in critically ill individuals.  
36  
37

38  
39 Whether chronic dysglycemia is associated with worse outcomes among Covid-19  
40 patients admitted to ICU remains uncertain. Dennis et al [21] found increased  
41 mortality risk at 30 days (HR 1.23 [95% CI 1.14, 1.32]) compared to patients with no  
42  
43  
44  
45  
46  
47  
48  
49  
50  
51  
52  
53  
54  
55  
56  
57  
58  
59  
60

1  
2  
3 diabetes in patients admitted to the high Dependency Unit or ICU, but did not take  
4  
5 HbA1c into consideration. A multicenter study from France including 410 ICU  
6  
7 patients with Covid-19, found no association between the severity of dysglycemia  
8  
9 and tracheal intubation and/or death within 7 days of admission in patients with  
10  
11 diabetes than in those without diabetes [22]. This is in accordance with the findings of  
12  
13 our study. In contrast, others found higher mortality in the subgroup of mechanically  
14  
15 ventilated patients with diabetes [14].  
16  
17

18  
19 We previously demonstrated an independent association between chronic  
20  
21 dysglycemia and need for RRT in critically ill non-Covid-19 patients [10]. This  
22  
23 association was, however, not found in the present study. In fact, we observed a  
24  
25 higher proportion of patients requiring RRT among our patients without chronic  
26  
27 dysglycemia and an inverse association between chronic dysglycemia and RRT use.  
28  
29 Only one individual in the controlled diabetes subgroup received RRT during ICU  
30  
31 stay. We believe this surprising finding may be due to treatment limitations. In fact,  
32  
33 after exclusion of patients with treatment limitation “not for RRT”, we observed no  
34  
35 statistically significant association between chronic dysglycemia and RRT use.  
36  
37  
38 Limitations in life-sustaining care were more common in the known diabetes groups  
39  
40 (well controlled and uncontrolled diabetes) than in all other groups. We cannot  
41  
42 exclude the possibility that patients with severe acute or chronic kidney injury did not  
43  
44 reach the ICU because of treatment limitation decisions made at hospital arrival or on  
45  
46 the medical ward. This might have influenced the number of patients with kidney  
47  
48 injury reaching the ICU, affecting predominantly patients with chronic dysglycemia,  
49  
50 as they are usually older and have multiple comorbidities.  
51  
52  
53  
54  
55  
56  
57

### 58 *Strengths and limitations*

59  
60

1  
2  
3 Our study has several strengths. It is the first to assess the prevalence of chronic  
4 dysglycemia in an ICU population with Covid-19 based on additional quantification of  
5 admission HbA1c. This approach reduced bias due to events that would have  
6 influenced HbA1c values obtained before ICU admission. We restricted the  
7 prevalence assessment to a cohort of patients who were admitted to ICUs where  
8 HbA1c was part of the routine laboratory panel, thereby reducing the risk of  
9 ascertainment bias. Additionally, by measuring HbA1c in all patients admitted to the  
10 ICU we identified 169 (82%) individuals with chronic dysglycemia and 86 (41.7%)  
11 with diabetes. If HbA1c would not have been measured routinely at ICU admission,  
12 we would only have identified 43 (20.9%) individuals with diabetes. Furthermore, we  
13 considered treatment limitations in our analysis of clinical outcomes, thereby  
14 reducing the risk of treatment selection bias. Finally, we included patients admitted to  
15 ten ICUs in three University hospitals, thus providing a degree of external validity for  
16 applying our findings to similar settings.

17  
18 Our study has limitations. We lack data on conditions and treatment that might have  
19 influenced admission HbA1c, such as haemoglobinopathies and blood transfusion  
20 before ICU admission. Since interviews with patients or relatives were not performed,  
21 a degree of misclassification due to non-documented dysglycemia diagnoses cannot  
22 be ruled out. However, such interviews would have been logistically difficult during  
23 the ongoing pandemic. We used an HbA1c cutoff of 42-47 mmol/mol (6.0-6.4%) to  
24 classify prediabetes. If we instead had used the cutoff suggested by the ADA (39-47  
25 mmol/mol [5.7-6.4%]), our prevalence of chronic dysglycemia would have increased  
26 from 82.0% to 91.3%. This approach did not, however, alter the association with the  
27 secondary outcomes (data not shown). In addition, we lack information about  
28 glycemic control during intensive care, which might have modified clinical outcomes.

1  
2  
3 The observational nature of the study does not imply causation. Generalizability of  
4 our results is limited to populations with similar health care systems and similar legal  
5 frame-works for decisions on treatment limitations. Finally, the limited sample size  
6 may limit the conclusion regarding secondary outcomes that can be drawn from the  
7 data.  
8  
9  
10  
11  
12  
13  
14  
15  
16

## 17 **Conclusion**

18  
19 In our multicenter cohort of Covid-19 patients admitted to the ICU, HbA1c screening  
20 diagnosed chronic dysglycemia in four out of five patients with the majority having  
21 either prediabetes or previously undiagnosed diabetes. Chronic dysglycemia was not  
22 significantly associated with mortality, ICU length of stay, duration of invasive  
23 mechanical ventilation or renal replacement therapy use after considering treatment  
24 limitations. These findings indicate that chronic dysglycemia may be a risk factor for  
25 severe Covid-19. However, Covid-19 prognosis in the ICU does not appear to be  
26 modified by chronic dysglycemia.  
27  
28  
29  
30  
31  
32  
33  
34  
35  
36  
37  
38  
39  
40

## 41 **Author Contributions:**

42 AB, SR, MC, JG, AO, CS and JM contributed to the concept and design of the study.

43  
44  
45  
46  
47 AB, SR, CH and JM collected data.

48  
49  
50  
51  
52  
53  
54  
55  
56  
57  
58  
59  
60  
61  
62  
63  
64  
65  
66  
67  
68  
69  
70  
71  
72  
73  
74  
75  
76  
77  
78  
79  
80  
81  
82  
83  
84  
85  
86  
87  
88  
89  
90  
91  
92  
93  
94  
95  
96  
97  
98  
99  
100  
101  
102  
103  
104  
105  
106  
107  
108  
109  
110  
111  
112  
113  
114  
115  
116  
117  
118  
119  
120  
121  
122  
123  
124  
125  
126  
127  
128  
129  
130  
131  
132  
133  
134  
135  
136  
137  
138  
139  
140  
141  
142  
143  
144  
145  
146  
147  
148  
149  
150  
151  
152  
153  
154  
155  
156  
157  
158  
159  
160  
161  
162  
163  
164  
165  
166  
167  
168  
169  
170  
171  
172  
173  
174  
175  
176  
177  
178  
179  
180  
181  
182  
183  
184  
185  
186  
187  
188  
189  
190  
191  
192  
193  
194  
195  
196  
197  
198  
199  
200  
201  
202  
203  
204  
205  
206  
207  
208  
209  
210  
211  
212  
213  
214  
215  
216  
217  
218  
219  
220  
221  
222  
223  
224  
225  
226  
227  
228  
229  
230  
231  
232  
233  
234  
235  
236  
237  
238  
239  
240  
241  
242  
243  
244  
245  
246  
247  
248  
249  
250  
251  
252  
253  
254  
255  
256  
257  
258  
259  
260  
261  
262  
263  
264  
265  
266  
267  
268  
269  
270  
271  
272  
273  
274  
275  
276  
277  
278  
279  
280  
281  
282  
283  
284  
285  
286  
287  
288  
289  
290  
291  
292  
293  
294  
295  
296  
297  
298  
299  
300  
301  
302  
303  
304  
305  
306  
307  
308  
309  
310  
311  
312  
313  
314  
315  
316  
317  
318  
319  
320  
321  
322  
323  
324  
325  
326  
327  
328  
329  
330  
331  
332  
333  
334  
335  
336  
337  
338  
339  
340  
341  
342  
343  
344  
345  
346  
347  
348  
349  
350  
351  
352  
353  
354  
355  
356  
357  
358  
359  
360  
361  
362  
363  
364  
365  
366  
367  
368  
369  
370  
371  
372  
373  
374  
375  
376  
377  
378  
379  
380  
381  
382  
383  
384  
385  
386  
387  
388  
389  
390  
391  
392  
393  
394  
395  
396  
397  
398  
399  
400  
401  
402  
403  
404  
405  
406  
407  
408  
409  
410  
411  
412  
413  
414  
415  
416  
417  
418  
419  
420  
421  
422  
423  
424  
425  
426  
427  
428  
429  
430  
431  
432  
433  
434  
435  
436  
437  
438  
439  
440  
441  
442  
443  
444  
445  
446  
447  
448  
449  
450  
451  
452  
453  
454  
455  
456  
457  
458  
459  
460  
461  
462  
463  
464  
465  
466  
467  
468  
469  
470  
471  
472  
473  
474  
475  
476  
477  
478  
479  
480  
481  
482  
483  
484  
485  
486  
487  
488  
489  
490  
491  
492  
493  
494  
495  
496  
497  
498  
499  
500  
501  
502  
503  
504  
505  
506  
507  
508  
509  
510  
511  
512  
513  
514  
515  
516  
517  
518  
519  
520  
521  
522  
523  
524  
525  
526  
527  
528  
529  
530  
531  
532  
533  
534  
535  
536  
537  
538  
539  
540  
541  
542  
543  
544  
545  
546  
547  
548  
549  
550  
551  
552  
553  
554  
555  
556  
557  
558  
559  
560  
561  
562  
563  
564  
565  
566  
567  
568  
569  
570  
571  
572  
573  
574  
575  
576  
577  
578  
579  
580  
581  
582  
583  
584  
585  
586  
587  
588  
589  
590  
591  
592  
593  
594  
595  
596  
597  
598  
599  
600  
601  
602  
603  
604  
605  
606  
607  
608  
609  
610  
611  
612  
613  
614  
615  
616  
617  
618  
619  
620  
621  
622  
623  
624  
625  
626  
627  
628  
629  
630  
631  
632  
633  
634  
635  
636  
637  
638  
639  
640  
641  
642  
643  
644  
645  
646  
647  
648  
649  
650  
651  
652  
653  
654  
655  
656  
657  
658  
659  
660  
661  
662  
663  
664  
665  
666  
667  
668  
669  
670  
671  
672  
673  
674  
675  
676  
677  
678  
679  
680  
681  
682  
683  
684  
685  
686  
687  
688  
689  
690  
691  
692  
693  
694  
695  
696  
697  
698  
699  
700  
701  
702  
703  
704  
705  
706  
707  
708  
709  
710  
711  
712  
713  
714  
715  
716  
717  
718  
719  
720  
721  
722  
723  
724  
725  
726  
727  
728  
729  
730  
731  
732  
733  
734  
735  
736  
737  
738  
739  
740  
741  
742  
743  
744  
745  
746  
747  
748  
749  
750  
751  
752  
753  
754  
755  
756  
757  
758  
759  
760  
761  
762  
763  
764  
765  
766  
767  
768  
769  
770  
771  
772  
773  
774  
775  
776  
777  
778  
779  
780  
781  
782  
783  
784  
785  
786  
787  
788  
789  
790  
791  
792  
793  
794  
795  
796  
797  
798  
799  
800  
801  
802  
803  
804  
805  
806  
807  
808  
809  
810  
811  
812  
813  
814  
815  
816  
817  
818  
819  
820  
821  
822  
823  
824  
825  
826  
827  
828  
829  
830  
831  
832  
833  
834  
835  
836  
837  
838  
839  
840  
841  
842  
843  
844  
845  
846  
847  
848  
849  
850  
851  
852  
853  
854  
855  
856  
857  
858  
859  
860  
861  
862  
863  
864  
865  
866  
867  
868  
869  
870  
871  
872  
873  
874  
875  
876  
877  
878  
879  
880  
881  
882  
883  
884  
885  
886  
887  
888  
889  
890  
891  
892  
893  
894  
895  
896  
897  
898  
899  
900  
901  
902  
903  
904  
905  
906  
907  
908  
909  
910  
911  
912  
913  
914  
915  
916  
917  
918  
919  
920  
921  
922  
923  
924  
925  
926  
927  
928  
929  
930  
931  
932  
933  
934  
935  
936  
937  
938  
939  
940  
941  
942  
943  
944  
945  
946  
947  
948  
949  
950  
951  
952  
953  
954  
955  
956  
957  
958  
959  
960  
961  
962  
963  
964  
965  
966  
967  
968  
969  
970  
971  
972  
973  
974  
975  
976  
977  
978  
979  
980  
981  
982  
983  
984  
985  
986  
987  
988  
989  
990  
991  
992  
993  
994  
995  
996  
997  
998  
999  
1000

AB and JM drafted the manuscript.

All authors critical reviewed and approved the final manuscript.



1  
2  
3 AB accepts full responsibility for the work and the conduct of the study, had access to  
4  
5 the data, and controlled the decision to publish.  
6  
7  
8  
9  
10

11  
12 **Funding** AB and JM were supported by Region Stockholm (clinical research  
13  
14 appointment and ALF project grants), grant number 580282.  
15  
16

17  
18 A non-peer-reviewed version of this article has been a part of a publicly defended PhD  
19  
20 thesis ISBN 978-91-8016-719-2 and was submitted to Karolinska Institute Open  
21  
22 Archive, available at <https://openarchive.ki.se/xmlui/handle/10616/48203> on 19  
23  
24 [September 2022](#).  
25  
26

27  
28 **Competing interest:** The authors have no competing interest relevant to this work.  
29

30  
31 **Data availability:** The data that support the findings of this study are available from  
32  
33 the corresponding author upon reasonable request.  
34

35  
36 **Ethics Approval Statement:** The study was approved by the Swedish Ethical  
37  
38 Review Authority (approval number 2020-01302).  
39

## 40 41 **References**

- 42  
43 [1] Yang J, Zheng Y, Gou X, Pu K, Chen Z, Guo Q, et al. Prevalence of comorbidities  
44 and its effects in patients infected with SARS-CoV-2: a systematic review and meta-  
45 analysis. *International Journal of Infectious Diseases* 2020;94:91-5.  
46 doi:10.1016/j.ijid.2020.03.017
- 47 [2] Liu Y, Lu R, Wang J, Cheng Q, Zhang R, Zhang S, et al. Diabetes, even newly  
48 defined by HbA1c testing, is associated with an increased risk of in-hospital death in  
49 adults with COVID-19. *BMC Endocrine Disorders* 2021;21(1):1-10.  
50 doi:10.1186/s12902-021-00717-6
- 51 [3] Guan W-j, Liang W-h, Zhao Y, Liang H-r, Chen Z-s, Li Y-m, et al. Comorbidity and  
52 its impact on 1590 patients with COVID-19 in China: a nationwide analysis. *European*  
53 *Respiratory Journal* 2020;55(5):2000547. doi:10.1183/13993003.00547-2020
- 54 [4] Roncon L, Zuin M, Rigatelli G, Zuliani G. Diabetic patients with COVID-19 infection  
55 are at higher risk of ICU admission and poor short-term outcome. *J Clin Virol*  
56 2020;127:104354. doi:10.1016/j.jcv.2020.104354  
57  
58  
59  
60

- 1  
2  
3 [5] Zhou F, Yu T, Du R, Fan G, Liu Y, Liu Z, et al. Clinical course and risk factors for  
4 mortality of adult inpatients with COVID-19 in Wuhan, China: a retrospective cohort  
5 study. *The Lancet* 2020;395. doi:10.1016/S0140-6736(20)30566-3  
6  
7 [6] Guo W, Li M, Dong Y, Zhou H, Zhang Z, Tian C, et al. Diabetes is a risk factor for  
8 the progression and prognosis of COVID-19. *Diabetes/metabolism research and*  
9 *reviews* 2020:e3319.  
10  
11 [7] Lei M, Lin K, Pi Y, Huang X, Fan L, Huang J, et al. Clinical Features and Risk  
12 Factors of ICU Admission for COVID-19 Patients with Diabetes. *Journal of Diabetes*  
13 *Research* 2020;2020:5237840. doi:10.1155/2020/5237840  
14  
15 [8] Grasselli G, Greco M, Zanella A, Albano G, Antonelli M, Bellani G, et al. Risk  
16 Factors Associated With Mortality Among Patients With COVID-19 in Intensive Care  
17 Units in Lombardy, Italy. *JAMA internal medicine* 2020;180(10):1345-55.  
18 doi:10.1001/jamainternmed.2020.3539  
19  
20 [9] Beagley J, Guariguata L, Weil C, Motala AA. Global estimates of undiagnosed  
21 diabetes in adults. *Diabetes Research and Clinical Practice* 2014;103(2):150-60.  
22 doi:https://doi.org/10.1016/j.diabres.2013.11.001  
23  
24 [10] Balintescu A, Palmgren I, Lipcsey M, Oldner A, Larsson A, Cronhjort M, et al.  
25 Prevalence and impact of chronic dysglycemia in intensive care unit patients-A  
26 retrospective cohort study. *Acta Anaesthesiol Scand* 2021;65(1):82-91.  
27 doi:10.1111/aas.13695  
28  
29 [11] Erik von Elm DGA, Matthias Egger, Stuart J. Pocock, Peter C. Gøtzsche, and Jan P.  
30 Vandenbroucke. The Strengthening the Reporting of Observational Studies in  
31 Epidemiology (STROBE) Statement: Guidelines for Reporting Observational Studies.  
32 *Annals of Internal Medicine* 2007;147(8):573-7. doi:10.7326/0003-4819-147-8-  
33 200710160-00010 %m 17938396  
34  
35 [12] Organisation WH. World Health Organisation. Use of Glycated Haemoglobin  
36 (HbA1c) in the Diagnosis of Diabetes Mellitus,  
37 [https://www.who.int/publications/i/item/use-of-glycated-haemoglobin-\(-hba1c\)-in-](https://www.who.int/publications/i/item/use-of-glycated-haemoglobin-(-hba1c)-in-diagnosis-of-diabetes-mellitus)  
38 [diagnosis-of-diabetes-mellitus](https://www.who.int/publications/i/item/use-of-glycated-haemoglobin-(-hba1c)-in-diagnosis-of-diabetes-mellitus); [accessed 07 Fenruary 2022].  
39  
40 [13] Tan E, Song J, Deane AM, Plummer MP. Global Impact of Coronavirus Disease 2019  
41 Infection Requiring Admission to the ICU: A Systematic Review and Meta-analysis.  
42 *Chest* 2021;159(2):524-36. doi:https://doi.org/10.1016/j.chest.2020.10.014  
43  
44 [14] Klein SJ, Mayerhöfer T, Fries D, Preuß Hernández C, Joannidis M, Collaborators, et  
45 al. Elevated HbA1c remains a predominant finding in severe COVID-19 and may be  
46 associated with increased mortality in patients requiring mechanical ventilation.  
47 *Critical Care* 2021;25(1):1-4. doi:10.1186/s13054-021-03730-2  
48  
49 [15] Memon B, Abdelalim EM. ACE2 function in the pancreatic islet: Implications for  
50 relationship between SARS-CoV-2 and diabetes. *Acta Physiologica* 2021;233(4):1-13.  
51 doi:10.1111/apha.13733  
52  
53 [16] Larsson E, Brattstrom O, Agvald-Ohman C, Grip J, Jalde FC, Stralin K, et al.  
54 Characteristics and outcomes of patients with COVID-19 admitted to ICU in a tertiary  
55 hospital in Stockholm, Sweden. *Acta anaesthesiologica Scandinavica* 2021;65(1):76-  
56 81. doi:10.1111/aas.13694  
57  
58 [17] Rysz S, Jonsson Fagerlund M, Rimes-Stigare C, Larsson E, Campoccia Jalde F,  
59 Mårtensson J. Chronic dysglycemia and risk of SARS-CoV-2 associated respiratory  
60 failure in hospitalized patients. *Acta anaesthesiologica Scandinavica* 2022;66(1):48-  
55. doi:10.1136/bjsports-2021-104080.  
61  
62 [18] Landstra CP, de Koning EJP. COVID-19 and Diabetes: Understanding the  
63 Interrelationship and Risks for a Severe Course. *Frontiers in endocrinology*  
64 2021;12:649525. doi:10.3389/fendo.2021.649525

- 1  
2  
3 [19] Wang S, Ma P, Zhang S, Song S, Wang Z, Ma Y, et al. Fasting blood glucose at  
4 admission is an independent predictor for 28-day mortality in patients with COVID-19  
5 without previous diagnosis of diabetes: a multi-centre retrospective study.  
6 *Diabetologia* 2020;63(10):2102-11. doi:10.1007/s00125-020-05209-1  
7  
8 [20] Holman N, Knighton P, Kar P, O'Keefe J, Curley M, Weaver A, et al. Risk factors for  
9 COVID-19-related mortality in people with type 1 and type 2 diabetes in England: a  
10 population-based cohort study. *The lancet Diabetes & endocrinology* 2020;8(10):823-  
11 33. doi:10.1016/S2213-8587(20)30271-0  
12  
13 [21] Dennis JM, Mateen BA, Sonabend R, Thomas NJ, Patel KA, Hattersley AT, et al.  
14 Type 2 Diabetes and COVID-19-Related Mortality in the Critical Care Setting: A  
15 National Cohort Study in England, March-July 2020. *Diabetes Care* 2021;44(1):50-7.  
16 doi:10.2337/dc20-1444  
17  
18 [22] Cariou B, Hadjadj S, Wargny M, Pichelin M, Al-Salameh A, Allix I, et al. Phenotypic  
19 characteristics and prognosis of inpatients with COVID-19 and diabetes: the  
20 CORONADO study. *Diabetologia* 2020;63(8):1500-15. doi:10.1007/s00125-020-  
21 05180-x  
22

### Figure legends

23  
24  
25 **Figure 1.** Flow chart of study population

26  
27 **Figure 2.** Prevalence of prediabetes, unknown diabetes and known diabetes among 206  
28 consecutive ICU patients with Covid-19

29  
30 **Figure 3.** Probability of survival in no chronic dysglycemia patients and in patients with  
31 chronic dysglycemia  
32  
33  
34  
35  
36  
37  
38  
39  
40  
41  
42  
43  
44  
45  
46  
47  
48  
49  
50  
51  
52  
53  
54  
55  
56  
57  
58  
59  
60



1  
2  
3  
4  
5  
6  
7  
8  
9  
10  
11  
12  
13  
14  
15  
16  
17  
18  
19  
20  
21  
22  
23  
24  
25  
26  
27  
28  
29  
30  
31  
32  
33  
34  
35  
36  
37  
38  
39  
40  
41  
42  
43  
44  
45  
46  
47  
48  
49  
50  
51  
52  
53  
54  
55  
56  
57  
58  
59  
60



Figure 2. Prevalence of prediabetes, unknown diabetes and known diabetes among 206 consecutive ICU patients with Covid-19

144x102mm (144 x 144 DPI)



Figure 3. Probability of survival in no chronic dysglycemia patients and in patients with chronic dysglycemi

770x521mm (144 x 144 DPI)

**Table S1: Post-hoc exploratory comparison between the subgroups for 90 days mortality and Renal replacement therapy**

| Subgroups                                                            | 90 day mortality               |      | Renal replacement therapy      |      |
|----------------------------------------------------------------------|--------------------------------|------|--------------------------------|------|
|                                                                      | N (%)                          | p    | N (%)                          | p    |
| No chronic dysglycemia vs Prediabetes                                | 9/61 (14.7) vs 28/114 (24.5)   | 0.17 | 17/61 (27.8) vs 22/114 (19.2)  | 0.25 |
| No chronic dysglycemia vs Unknown diabetes                           | 9/61 (14.7) vs 12/60 (20.0)    | 0.48 | 17/61 (27.8) vs 11/60 (18.3)   | 0.28 |
| No chronic dysglycemia vs Controlled diabetes                        | 9/61 (14.7) vs 7/25 (28.0)     | 0.22 | 17/61 (27.8) vs 1/25 (4.0)     | 0.01 |
| No chronic dysglycemia vs Uncontrolled diabetes                      | 9/61 (14.7) vs 15/48 (31.2)    | 0.06 | 17/61 (27.8) vs 8/48 (16.6)    | 0.25 |
| Prediabetes vs Unknown diabetes                                      | 28/114 (24.5) vs 12/60 (20.0)  | 0.57 | 22/114 (19.2) vs 11/60 (18.3)  | 1    |
| Prediabetes vs Controlled diabetes                                   | 28/114 (24.5) vs 7/25 (28.0)   | 0.79 | 22/114 (19.2) vs 1/25 (4.0)    | 0.07 |
| Prediabetes vs Uncontrolled diabetes                                 | 28/114 (24.5) vs 15/48 (31.2)  | 0.43 | 22/114 (19.2) vs 8/48 (16.6)   | 0.8  |
| Unknown diabetes vs Controlled diabetes                              | 12/60 (20.0) vs 7/25 (28.0)    | 0.41 | 11/60 (18.3) vs 1/25 (4.0)     | 0.1  |
| Unknown diabetes vs Uncontrolled diabetes                            | 12/60 (20.0) vs 15/48 (31.2)   | 0.18 | 11/60 (18.3) vs 8/48 (16.6)    | 1    |
| Controlled vs Uncontrolled diabetes                                  | 7/25 (28.0) vs 15/48 (31.2)    | 0.77 | 1/25 (4.0) vs 8/48 (16.6)      | 0.01 |
| No chronic dysglycemia and prediabetes vs unknown and known diabetes | 37/175 (21.1) vs 34/133 (25.5) | 0.41 | 39/175 (22.2) vs 20/133 (15.0) | 0.14 |

P values calculated with Fischer's exact test



**Figure S1.** Cumulative percentage of patients with a treatment limitation: no renal replacement therapy. Day 0 (zero) denotes the day of admission to the intensive care unit.



**Figure S2.** Cumulative percentage of patients with a treatment limitation: no cardiopulmonary resuscitation. Day 0 (zero) denotes the day of admission to the intensive care unit.



**Figure S3.** Cumulative percentage of patients with a treatment limitation: no invasive mechanical ventilation. Day 0 (zero) denotes the day of admission to the intensive care unit.



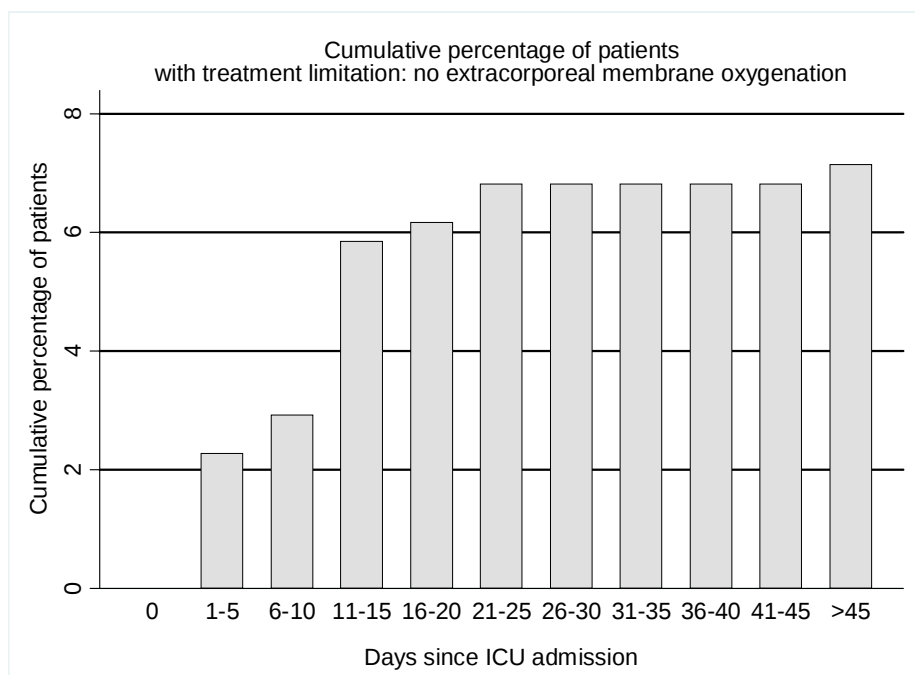

**Figure S4.** Cumulative percentage of patients with a treatment limitation: no extracorporeal membrane oxygenation. Day 0 (zero) denotes the day of admission to the intensive care unit.

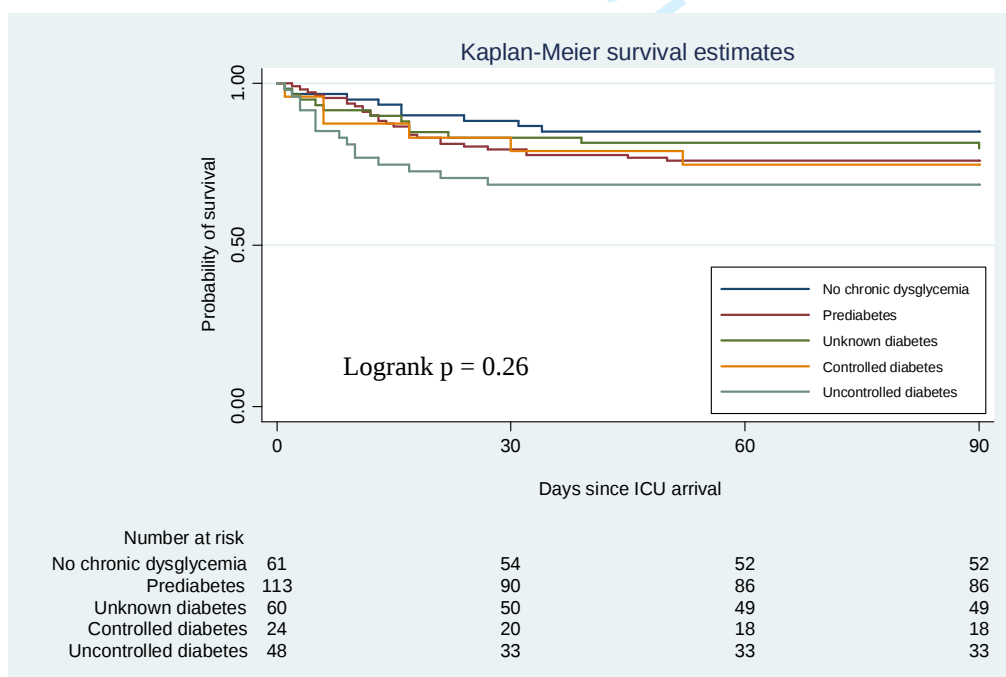

**Figure S5.** Probability of survival in the study groups

STROBE Statement—Checklist of items that should be included in reports of *cohort studies*

Page references for document: **Chronic dysglycemia in critically ill patients with Covid-19 – a retrospective cohort study**

|                              | Item No | Recommendation                                                                                                                                                                                                                                                                                                         | Page No                                  |
|------------------------------|---------|------------------------------------------------------------------------------------------------------------------------------------------------------------------------------------------------------------------------------------------------------------------------------------------------------------------------|------------------------------------------|
| <b>Title and abstract</b>    | 1       | (a) Indicate the study's design with a commonly used term in the title or the abstract<br>(b) Provide in the abstract an informative and balanced summary of what was done and what was found                                                                                                                          | 1<br>2-3                                 |
| <b>Introduction</b>          |         |                                                                                                                                                                                                                                                                                                                        |                                          |
| Background/rationale         | 2       | Explain the scientific background and rationale for the investigation being reported                                                                                                                                                                                                                                   | 3-4                                      |
| Objectives                   | 3       | State specific objectives, including any prespecified hypotheses                                                                                                                                                                                                                                                       | 4                                        |
| <b>Methods<sup>4</sup></b>   |         |                                                                                                                                                                                                                                                                                                                        |                                          |
| Study design                 | 4       | Present key elements of study design early in the paper                                                                                                                                                                                                                                                                | 4, 5                                     |
| Setting                      | 5       | Describe the setting, locations, and relevant dates, including periods of recruitment, exposure, follow-up, and data collection                                                                                                                                                                                        | 5-6                                      |
| Participants                 | 6       | (a) Give the eligibility criteria, and the sources and methods of selection of participants. Describe methods of follow-up<br>(b) For matched studies, give matching criteria and number of exposed and unexposed                                                                                                      | 5-7<br>NA                                |
| Variables                    | 7       | Clearly define all outcomes, exposures, predictors, potential confounders, and effect modifiers. Give diagnostic criteria, if applicable                                                                                                                                                                               | 7-8                                      |
| Data sources/<br>measurement | 8*      | For each variable of interest, give sources of data and details of methods of assessment (measurement). Describe comparability of assessment methods if there is more than one group                                                                                                                                   | 5-7                                      |
| Bias                         | 9       | Describe any efforts to address potential sources of bias                                                                                                                                                                                                                                                              | 5                                        |
| Study size                   | 10      | Explain how the study size was arrived at                                                                                                                                                                                                                                                                              | 5-6,<br>Figure 1                         |
| Quantitative variables       | 11      | Explain how quantitative variables were handled in the analyses. If applicable, describe which groupings were chosen and why                                                                                                                                                                                           | 6-8                                      |
| Statistical methods          | 12      | (a) Describe all statistical methods, including those used to control for confounding<br>(b) Describe any methods used to examine subgroups and interactions<br>(c) Explain how missing data were addressed<br>(d) If applicable, explain how loss to follow-up was addressed<br>(e) Describe any sensitivity analyses | 7<br>7<br>8<br>NA<br>NA                  |
| <b>Results</b>               |         |                                                                                                                                                                                                                                                                                                                        |                                          |
| Participants                 | 13*     | (a) Report numbers of individuals at each stage of study—eg numbers potentially eligible, examined for eligibility, confirmed eligible, included in the study, completing follow-up, and analysed<br>(b) Give reasons for non-participation at each stage<br>(c) Consider use of a flow diagram                        | 8-9,<br>Figure 1<br>Figure 1<br>Figure 1 |

|    |                  |     |                                                                                                                                          |       |
|----|------------------|-----|------------------------------------------------------------------------------------------------------------------------------------------|-------|
| 1  | Descriptive data | 14* | (a) Give characteristics of study participants (eg demographic, clinical, social) and information on exposures and potential confounders | 8-9   |
| 2  |                  |     |                                                                                                                                          | Table |
| 3  |                  |     |                                                                                                                                          | 1     |
| 4  |                  |     | (b) Indicate number of participants with missing data for each variable of interest                                                      | Table |
| 5  |                  |     |                                                                                                                                          | 1     |
| 6  |                  |     | (c) Summarise follow-up time (eg, average and total amount)                                                                              | NA    |
| 7  |                  |     |                                                                                                                                          |       |
| 8  | Outcome data     | 15* | Report numbers of outcome events or summary measures over time                                                                           | 10-11 |
| 9  |                  |     |                                                                                                                                          | Table |
| 10 |                  |     |                                                                                                                                          | 2-3   |

For peer review only

11  
12  
13  
14  
15  
16  
17  
18  
19  
20  
21  
22  
23  
24  
25  
26  
27  
28  
29  
30  
31  
32  
33  
34  
35  
36  
37  
38  
39  
40  
41  
42  
43  
44  
45  
46  
47  
48  
49  
50  
51  
52  
53  
54  
55  
56  
57  
58  
59  
60

|                                      |                          |    |                                                                                                                                                                                                                                                                                                                                                                                                                       |                                  |
|--------------------------------------|--------------------------|----|-----------------------------------------------------------------------------------------------------------------------------------------------------------------------------------------------------------------------------------------------------------------------------------------------------------------------------------------------------------------------------------------------------------------------|----------------------------------|
| 1<br>2<br>3<br>4<br>5<br>6<br>7<br>8 | Main results             | 16 | (a) Give unadjusted estimates and, if applicable, confounder-adjusted estimates and their precision (eg, 95% confidence interval). Make clear which confounders were adjusted for and why they were included<br><br>(b) Report category boundaries when continuous variables were categorized<br><br>(c) If relevant, consider translating estimates of relative risk into absolute risk for a meaningful time period | 10-11<br>Table<br>3              |
| 9<br>10<br>11<br>12                  | Other analyses           | 17 | Report other analyses done—eg analyses of subgroups and interactions, and sensitivity analyses                                                                                                                                                                                                                                                                                                                        | 11<br>Figure<br>2,3,S1-<br>4, S5 |
| 13                                   | <b>Discussion</b>        |    |                                                                                                                                                                                                                                                                                                                                                                                                                       |                                  |
| 14                                   | Key results              | 18 | Summarise key results with reference to study objectives                                                                                                                                                                                                                                                                                                                                                              | 11                               |
| 15<br>16<br>17                       | Limitations              | 19 | Discuss limitations of the study, taking into account sources of potential bias or imprecision. Discuss both direction and magnitude of any potential bias                                                                                                                                                                                                                                                            | 14                               |
| 18<br>19<br>20<br>21                 | Interpretation           | 20 | Give a cautious overall interpretation of results considering objectives, limitations, multiplicity of analyses, results from similar studies, and other relevant evidence                                                                                                                                                                                                                                            | 15                               |
| 22                                   | Generalisability         | 21 | Discuss the generalisability (external validity) of the study results                                                                                                                                                                                                                                                                                                                                                 | 13-14                            |
| 23                                   | <b>Other information</b> |    |                                                                                                                                                                                                                                                                                                                                                                                                                       |                                  |
| 24<br>25<br>26                       | Funding                  | 22 | Give the source of funding and the role of the funders for the present study and, if applicable, for the original study on which the present article is based                                                                                                                                                                                                                                                         | 15                               |

\*Give information separately for exposed and unexposed groups.

**Note:** An Explanation and Elaboration article discusses each checklist item and gives methodological background and published examples of transparent reporting. The STROBE checklist is best used in conjunction with this article (freely available on the Web sites of PLoS Medicine at <http://www.plosmedicine.org/>, Annals of Internal Medicine at <http://www.annals.org/>, and Epidemiology at <http://www.epidem.com/>). Information on the STROBE Initiative is available at <http://www.strobe-statement.org>.
