# Supplementary material for: Prevalence and impact of chronic dysglycaemia among patients with COVID-19 in Swedish intensive care units: a multicentre, retrospective cohort study
Source: PubMed Central journal article supplement (PMC10510869; doi:10.1136/bmjopen-2022-071330), 2023-09-19
Supplement: bmjopen-2022-071330supp001.pdf [file bmjopen-2022-071330supp001.pdf]

**Table S1: Post-hoc exploratory comparison between the subgroups for 90 days mortality and Renal replacement therapy**

| Subgroups                                                            | 90 day mortality               |      | Renal replacement therapy      |      |
|----------------------------------------------------------------------|--------------------------------|------|--------------------------------|------|
|                                                                      | N (%)                          | p    | N (%)                          | p    |
| No chronic dysglycemia vs Prediabetes                                | 9/61 (14.7) vs 28/114 (24.5)   | 0.17 | 17/61 (27.8) vs 22/114 (19.2)  | 0.25 |
| No chronic dysglycemia vs Unknown diabetes                           | 9/61 (14.7) vs 12/60 (20.0)    | 0.48 | 17/61 (27.8) vs 11/60 (18.3)   | 0.28 |
| No chronic dysglycemia vs Controlled diabetes                        | 9/61 (14.7) vs 7/25 (28.0)     | 0.22 | 17/61 (27.8) vs 1/25 (4.0)     | 0.01 |
| No chronic dysglycemia vs Uncontrolled diabetes                      | 9/61 (14.7) vs 15/48 (31.2)    | 0.06 | 17/61(27.8) vs 8/48 (16.6)     | 0.25 |
| Prediabetes vs Unknown diabetes                                      | 28/114 (24.5) vs 12/60 (20.0)  | 0.57 | 22/114 (19.2) vs 11/60 (18.3)  | 1    |
| Prediabetes vs Controlled diabetes                                   | 28/114 (24.5) vs 7/25 (28.0)   | 0.79 | 22/114 (19.2) vs 1/ 25 (4.0)   | 0.07 |
| Prediabetes vs Uncontrolled diabetes                                 | 28/114 (24.5) vs 15/48 (31.2)  | 0.43 | 22/114 (19.2) vs 8/48 (16.6)   | 0.8  |
| Unknown diabetes vs Controlled diabetes                              | 12/60 (20.0) vs 7/25 (28.0)    | 0.41 | 11/60 (18.3) vs 1/25 (4.0)     | 0.1  |
| Unknown diabetes vs Uncontrolled diabetes                            | 12/60 (20.0) vs 15/48 (31.2)   | 0.18 | 11/60 (18.3) vs 8/48 (16.6)    | 1    |
| Controlled vs Uncontrolled diabetes                                  | 7/25 (28.0) vs 15/48 (31.2)    | 0.77 | 1/25 (4.0) vs 8/48 (16.6)      | 0.01 |
| No chronic dysglycemia and prediabetes vs unknown and known diabetes | 37/175 (21.1) vs 34/133 (25.5) | 0.41 | 39/175 (22.2) vs 20/133 (15.0) | 0.14 |

P values calculated with Fischer's exact test

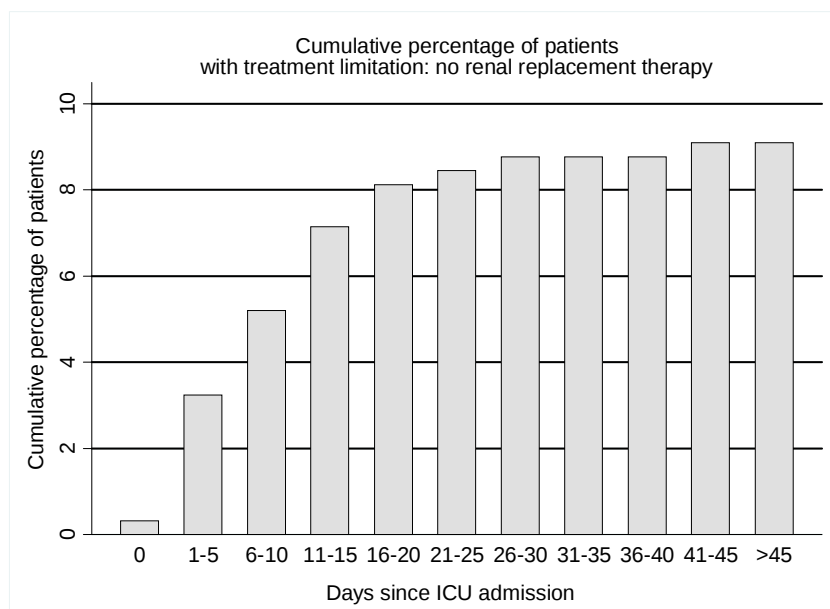

**Figure S1.** Cumulative percentage of patients with a treatment limitation: no renal replacement therapy. Day 0 (zero) denotes the day of admission to the intensive care unit.

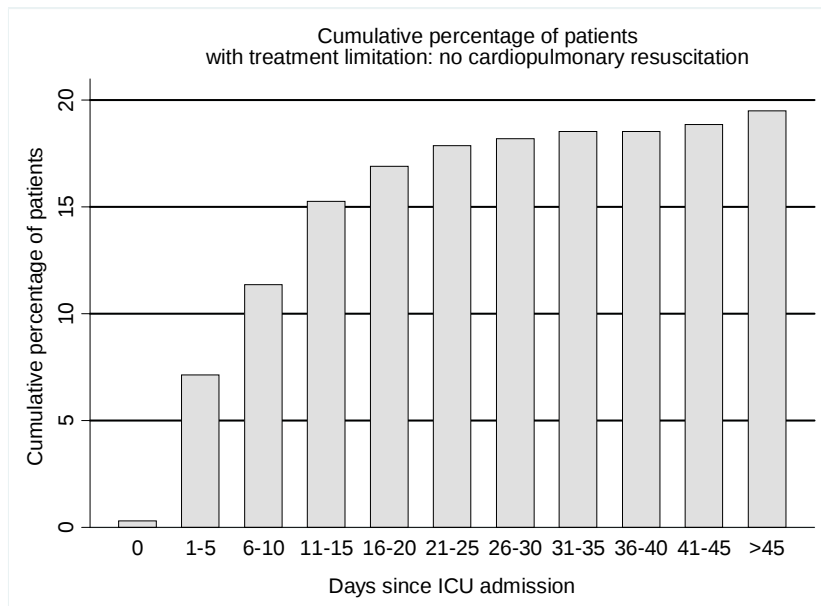

**Figure S2.** Cumulative percentage of patients with a treatment limitation: no cardiopulmonary resuscitation. Day 0 (zero) denotes the day of admission to the intensive care unit.

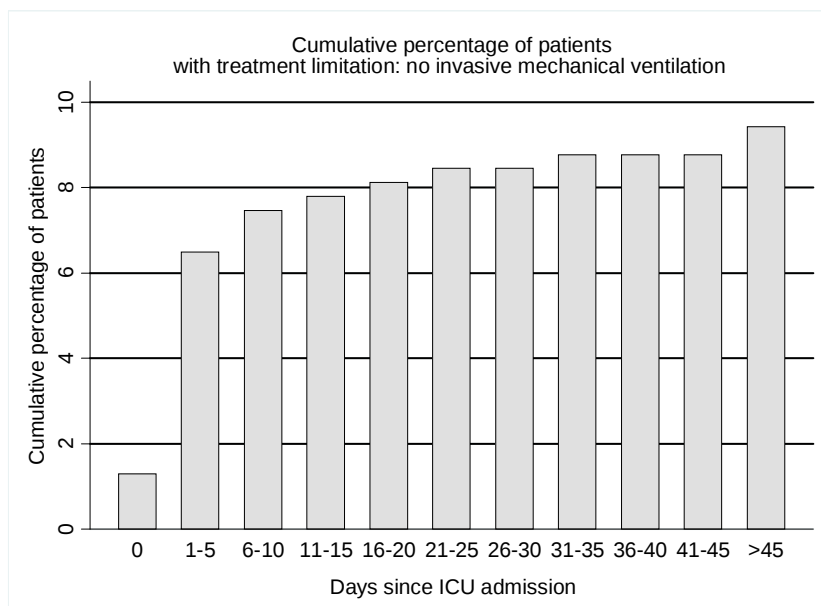

**Figure S3.** Cumulative percentage of patients with a treatment limitation: no invasive mechanical ventilation. Day 0 (zero) denotes the day of admission to the intensive care unit.

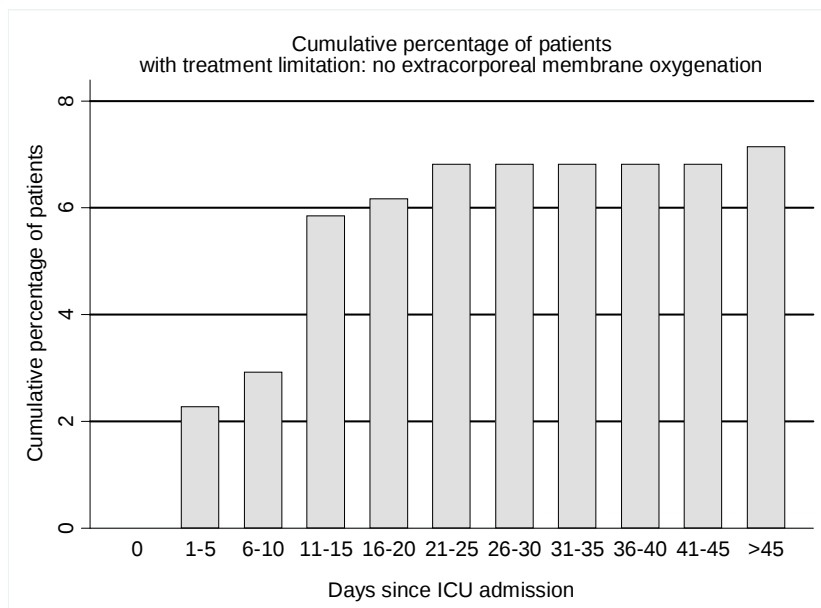

**Figure S4.** Cumulative percentage of patients with a treatment limitation: no extracorporeal membrane oxygenation. Day 0 (zero) denotes the day of admission to the intensive care unit.

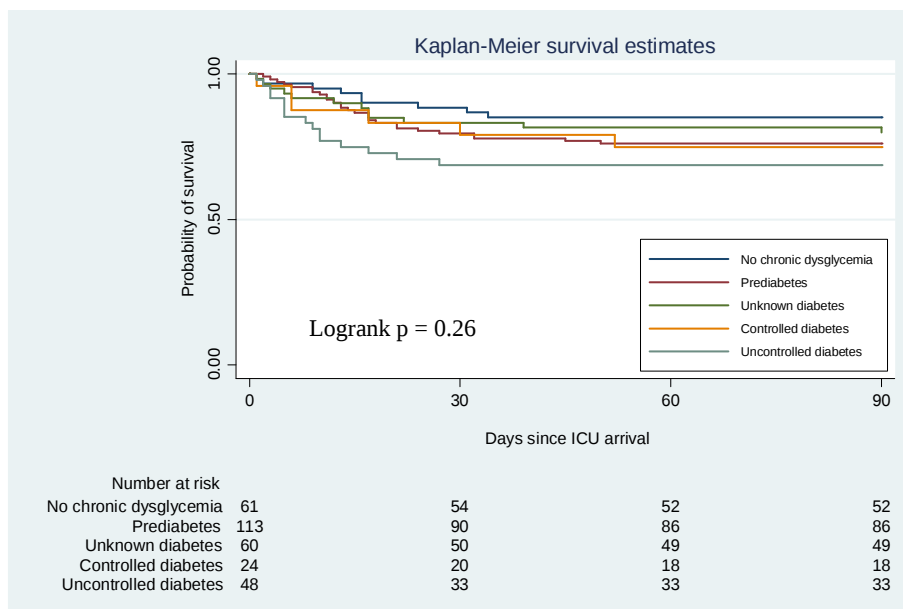

**Figure S5.** Probability of survival in the study groups
